# Supplementary material for: Effectiveness of low-level laser therapy in reducing pain score and healing time of recurrent aphthous stomatitis: a systematic review and meta-analysis
Source: PubMed Central journal article supplement (PMC11264394; doi:10.1186/s13643-024-02595-0), 2024-07-22
Supplement: 13643_2024_2595_MOESM1_ESM.pdf [file 13643_2024_2595_MOESM1_ESM.pdf]

|    | A                        | B                | C               | D                       | E                       | F                   | G                 | H                      | I              |
|----|--------------------------|------------------|-----------------|-------------------------|-------------------------|---------------------|-------------------|------------------------|----------------|
| 1  | <b>Basic information</b> |                  |                 |                         |                         |                     |                   |                        |                |
| 2  | <b>Time</b>              | <b>Unique ID</b> | <b>Assessor</b> | <b>Study ID</b>         | <b>Reference</b>        | <b>Experimental</b> | <b>Comparator</b> | <b>Outcome</b>         | <b>Results</b> |
| 3  | 2022/08/31 11.29         | RCT1             | SRP/FYM/DR      | Zand et al., 2009       | Zand et al., 2009       | CO2 laser           | Placebo           | Reduced pain           | MD             |
| 4  | 2022/08/28 12.17         | RCT2             | SRP/FYM/DR      | De Souza et al., 2010   | De Souza et al., 2010   | InGaIP laser        | Triamcinolone ace | Reduced pain           | MD             |
| 5  | 2022/08/28 19.10         | RCT3             | SRP/FYM/DR      | Zand et al., 2012       | Zand et al., 2012       | CO2 laser           | Placebo           | Reduced healing time   | MD             |
| 6  | 2022/08/30 06.36         | RCT4             | SRP/FYM/DR      | Prasad et al., 2013     | Prasad et al., 2013     | CO2 laser           | Placebo           | Reduced pain & healing | MD             |
| 7  | 2022/08/28 12.48         | RCT5             | SRP/FYM/DR      | Albrektson et al., 2014 | Albrektson et al., 2014 | GaAlAs laser        | Placebo           | Reduced pain           | MD             |
| 8  | 2022/08/28 12.54         | RCT6             | SRP/FYM/DR      | Lalabonova et al., 2014 | Lalabonova et al., 2014 | Nd:YAG laser        | Granofurin Solcos | Reduced pain           | MD             |
| 9  | 2022/08/28 12.58         | RCT7             | SRP/FYM/DR      | Rezvaninez et al., 2016 | Rezvaninez et al., 2016 | InGaAIP laser       | Betamethasone, F  | Reduced pain           | MD             |
| 10 | 2022/08/28 13.06         | RCT8             | SRP/FYM/DR      | Jahromi et al., 2017    | Jahromi et al., 2017    | InGaAIP             | Placebo           | Reduced pain           | MD             |
| 11 | 2022/08/28 13.02         | RCT9             | SRP/FYM/DR      | Yilmaz et al., 2017     | Yilmaz et al., 2017     | Er,Cr:YSGG Laser    | Placebo           | Reduced pain & healing | MD             |
| 12 | 2022/08/28 13.16         | RCT10            | SRP/FYM/DR      | Mustafa et al., 2018    | Mustafa et al., 2018    | Er,Cy:YSGG laser    | Triamcinolone ace | Reduced pain           | MD             |
| 13 | 2022/08/28 13.20         | RCT11            | SRP/FYM/DR      | Soliman et al., 2019    | Soliman et al., 2019    | Diode laser         | Sodium bicarbona  | Reduced pain           | MD             |
| 14 | 2022/08/28 13.25         | RCT12            | SRP/FYM/DR      | Bardellini et al., 2020 | Bardellini et al., 2020 | Diode laser         | Placebo           | Reduced pain           | MD             |
| 15 | 2022/08/28 19.00         | RCT13            | SRP/FYM/DR      | Huo et al., 2020        | Huo et al., 2020        | Diode laser         | Triamcinolone ace | Reduced pain           | MD             |
| 16 | 2022/08/28 13.32         | RCT14            | SRP/FYM/DR      | Ghali et al., 2022      | Ghali et al., 2022      | Diode laser         | Anginovag, Placeb | Reduced pain & healing | MD             |

|    | J                                                            | K                  | L      | M                  | N   | O   | P                |
|----|--------------------------------------------------------------|--------------------|--------|--------------------|-----|-----|------------------|
| 1  |                                                              |                    |        |                    |     |     |                  |
| 2  | Aim                                                          | Effect of adhering | Weight | Sources            | 1.1 | 1.2 | Note for 1.1&1.2 |
| 3  | assignment to intervention (the 'intention-to-treat' effect) | NA                 | 1      | Journal article(s) | Y   | PY  |                  |
| 4  | assignment to intervention (the 'intention-to-treat' effect) | NA                 | 1      | Journal article(s) | Y   | PY  |                  |
| 5  | assignment to intervention (the 'intention-to-treat' effect) | NA                 | 1      | Journal article(s) | NI  | PY  |                  |
| 6  | assignment to intervention (the 'intention-to-treat' effect) | NA                 | 1      | Journal article(s) | Y   | PY  |                  |
| 7  | assignment to intervention (the 'intention-to-treat' effect) | NA                 | 1      | Journal article(s) | Y   | PY  |                  |
| 8  | assignment to intervention (the 'intention-to-treat' effect) | NA                 | 1      | Journal article(s) | Y   | NI  |                  |
| 9  | assignment to intervention (the 'intention-to-treat' effect) | NA                 | 1      | Journal article(s) | Y   | NI  |                  |
| 10 | assignment to intervention (the 'intention-to-treat' effect) | NA                 | 1      | Journal article(s) | Y   | NI  |                  |
| 11 | assignment to intervention (the 'intention-to-treat' effect) | NA                 | 1      | Journal article(s) | Y   | Y   |                  |
| 12 | assignment to intervention (the 'intention-to-treat' effect) | NA                 | 1      | Journal article(s) | NI  | NI  |                  |
| 13 | assignment to intervention (the 'intention-to-treat' effect) | NA                 | 1      | Journal article(s) | Y   | Y   |                  |
| 14 | assignment to intervention (the 'intention-to-treat' effect) | NA                 | 1      | Journal article(s) | Y   | Y   |                  |
| 15 | assignment to intervention (the 'intention-to-treat' effect) | NA                 | 1      | Journal article(s) | Y   | PY  |                  |
| 16 | assignment to intervention (the 'intention-to-treat' effect) | NA                 | 1      | Journal article(s) | NI  | NI  |                  |

|    | Q                                      | R                   | S                           | T                               | U                       | V                             | W                            | X          | Y          |
|----|----------------------------------------|---------------------|-----------------------------|---------------------------------|-------------------------|-------------------------------|------------------------------|------------|------------|
| 1  | <b>Domain 1. Randomization process</b> |                     |                             |                                 |                         |                               |                              |            |            |
| 2  | <b>1.3</b>                             | <b>Note for 1.3</b> | <b>1.0 Algorithm result</b> | <b>1.0 Assessor's Judgement</b> | <b>1.0 General note</b> | <b>1.0 Optional Questions</b> | <b>1.0 Note for optional</b> | <b>2.1</b> | <b>2.2</b> |
| 3  | PN                                     |                     | Low                         | Low                             |                         |                               |                              | N          | Y          |
| 4  | NI                                     |                     | Low                         | Low                             |                         |                               |                              | NI         | NI         |
| 5  | PN                                     |                     | Low                         | Low                             |                         |                               |                              | PN         | N          |
| 6  | PN                                     |                     | Low                         | Low                             |                         |                               |                              | N          | N          |
| 7  | PN                                     |                     | Low                         | Low                             |                         |                               |                              | PN         | Y          |
| 8  | PN                                     |                     | Some concerns               | Some concerns                   |                         |                               |                              | NI         | NI         |
| 9  | PN                                     |                     | Some concerns               | Some concerns                   |                         |                               |                              | NI         | NI         |
| 10 | N                                      |                     | Some concerns               | Some concerns                   |                         |                               |                              | NI         | N          |
| 11 | N                                      |                     | Low                         | Low                             |                         |                               |                              | PN         | PY         |
| 12 | NI                                     |                     | Some concerns               | Some concerns                   |                         |                               |                              | PY         | PY         |
| 13 | N                                      |                     | Low                         | Low                             |                         |                               |                              | NI         | NI         |
| 14 | N                                      |                     | Low                         | Low                             |                         |                               |                              | PN         | Y          |
| 15 | NI                                     |                     | Low                         | Low                             |                         |                               |                              | NI         | NI         |
| 16 | NI                                     |                     | Some concerns               | Some concerns                   |                         |                               |                              | NI         | NI         |

|    | Z                                                       | AA         | AB                  | AC         | AD                  | AE         | AF                  | AG         | AH                  | AI         | AJ                  |
|----|---------------------------------------------------------|------------|---------------------|------------|---------------------|------------|---------------------|------------|---------------------|------------|---------------------|
| 1  | <b>Domain 2. Deviations from intended interventions</b> |            |                     |            |                     |            |                     |            |                     |            |                     |
| 2  | <b>Note for 2.1&amp;2.2</b>                             | <b>2.3</b> | <b>Note for 2.3</b> | <b>2.4</b> | <b>Note for 2.4</b> | <b>2.5</b> | <b>Note for 2.5</b> | <b>2.6</b> | <b>Note for 2.6</b> | <b>2.7</b> | <b>Note for 2.7</b> |
| 3  |                                                         | N          |                     | NA         |                     | NA         |                     | Y          |                     | NA         |                     |
| 4  |                                                         | NI         |                     | NA         |                     | NA         |                     | NI         |                     | NI         |                     |
| 5  |                                                         | NA         |                     | NA         |                     | NA         |                     | PY         |                     | NA         |                     |
| 6  |                                                         | NA         |                     | NA         |                     | NA         |                     | Y          |                     | NA         |                     |
| 7  |                                                         | N          |                     | NA         |                     | NA         |                     | Y          |                     | NA         |                     |
| 8  |                                                         | NI         |                     | NA         |                     | NA         |                     | PY         |                     | NA         |                     |
| 9  |                                                         | NI         |                     | NA         |                     | NA         |                     | PY         |                     | NA         |                     |
| 10 |                                                         | NI         |                     | NA         |                     | NA         |                     | PY         |                     | NA         |                     |
| 11 |                                                         | NI         |                     | NA         |                     | NA         |                     | PY         |                     | NA         |                     |
| 12 |                                                         | NI         |                     | NA         |                     | NA         |                     | PY         |                     | NA         |                     |
| 13 |                                                         | PN         |                     | NA         |                     | NA         |                     | PY         |                     | NA         |                     |
| 14 |                                                         | PN         |                     | NA         |                     | NA         |                     | Y          |                     | NA         |                     |
| 15 |                                                         | NI         |                     | NA         |                     | NA         |                     | Y          |                     | NA         |                     |
| 16 |                                                         | NI         |                     | PN         |                     | NA         |                     | PN         |                     | PN         |                     |

|    | AK                          | AL                              | AM                | AN                       | AO                        | AP         | AQ                  | AR         | AS                  | AT         |
|----|-----------------------------|---------------------------------|-------------------|--------------------------|---------------------------|------------|---------------------|------------|---------------------|------------|
| 1  |                             |                                 |                   |                          |                           |            |                     |            |                     |            |
| 2  | <b>2.0 Algorithm result</b> | <b>2.0 Assessor's Judgement</b> | <b>2.0 Genera</b> | <b>2.0 Optional Ques</b> | <b>2.0 Note for optio</b> | <b>3.1</b> | <b>Note for 3.1</b> | <b>3.2</b> | <b>Note for 3.2</b> | <b>3.3</b> |
| 3  | Low                         | Low                             |                   |                          |                           | Y          |                     | NA         |                     | NA         |
| 4  | High                        | High                            |                   |                          |                           | Y          |                     | NA         |                     | NA         |
| 5  | Low                         | Low                             |                   |                          |                           | NI         |                     | PN         |                     | NI         |
| 6  | Low                         | Low                             |                   |                          |                           | NI         |                     | N          |                     | NI         |
| 7  | Low                         | Low                             |                   |                          |                           | PY         |                     | NA         |                     | NA         |
| 8  | Some concerns               | Some concerns                   |                   |                          |                           | Y          |                     | NA         |                     | NA         |
| 9  | Some concerns               | Some concerns                   |                   |                          |                           | N          |                     | N          |                     | PY         |
| 10 | Some concerns               | Some concerns                   |                   |                          |                           | Y          |                     | NA         |                     | NA         |
| 11 | Some concerns               | Some concerns                   |                   |                          |                           | Y          |                     | NA         |                     | NA         |
| 12 | Some concerns               | Some concerns                   |                   |                          |                           | Y          |                     | NA         |                     | NA         |
| 13 | Low                         | Low                             |                   |                          |                           | Y          |                     | NA         |                     | NA         |
| 14 | Low                         | Low                             |                   |                          |                           | Y          |                     | NA         |                     | NA         |
| 15 | Some concerns               | Some concerns                   |                   |                          |                           | N          |                     | PN         |                     | NI         |
| 16 | Some concerns               | Some concerns                   |                   |                          |                           | NI         |                     | N          |                     | NI         |

|    | AU                                    | AV         | AX                          | AY                              | AZ                       | BA                            | BB                           | BC         | BD                  | BE         |
|----|---------------------------------------|------------|-----------------------------|---------------------------------|--------------------------|-------------------------------|------------------------------|------------|---------------------|------------|
| 1  | <b>Domain 3. Missing outcome data</b> |            |                             |                                 |                          |                               |                              |            |                     |            |
| 2  | <b>Note for 3.3&amp;3.4</b>           | <b>3.4</b> | <b>3.0 Algorithm result</b> | <b>3.0 Assessor's judgement</b> | <b>3.0 General notes</b> | <b>3.0 Optional Questions</b> | <b>3.0 Note for optional</b> | <b>4.1</b> | <b>Note for 4.1</b> | <b>4.2</b> |
| 3  |                                       | NA         | Low                         | Low                             |                          |                               |                              | N          |                     | N          |
| 4  |                                       | NA         | Low                         | Low                             |                          |                               |                              | NI         |                     | PN         |
| 5  |                                       | NI         | High                        | High                            |                          |                               |                              | PN         |                     | PN         |
| 6  |                                       | NI         | High                        | High                            |                          |                               |                              | N          |                     | N          |
| 7  |                                       | NA         | Low                         | Low                             |                          |                               |                              | N          |                     | N          |
| 8  |                                       | NA         | Low                         | Low                             |                          |                               |                              | N          |                     | N          |
| 9  |                                       | NI         | High                        | High                            |                          |                               |                              | N          |                     | N          |
| 10 |                                       | NA         | Low                         | Low                             |                          |                               |                              | N          |                     | N          |
| 11 |                                       | NA         | Low                         | Low                             |                          |                               |                              | N          |                     | N          |
| 12 |                                       | NA         | Low                         | Low                             |                          |                               |                              | N          |                     | N          |
| 13 |                                       | NA         | Low                         | Low                             |                          |                               |                              | N          |                     | N          |
| 14 |                                       | NA         | Low                         | Low                             |                          |                               |                              | N          |                     | N          |
| 15 |                                       | NI         | High                        | High                            |                          |                               |                              | N          |                     | N          |
| 16 |                                       | NA         | High                        | High                            |                          |                               |                              | N          |                     | N          |

|    | BF                                          | BG         | BH                  | BI         | BJ                          | BK         | BM                          | BN                              | BO                      | BP                        |
|----|---------------------------------------------|------------|---------------------|------------|-----------------------------|------------|-----------------------------|---------------------------------|-------------------------|---------------------------|
| 1  | <b>Domain 4. Measurement of the outcome</b> |            |                     |            |                             |            |                             |                                 |                         |                           |
| 2  | <b>Note for 4.2</b>                         | <b>4.3</b> | <b>Note for 4.3</b> | <b>4.4</b> | <b>Note for 4.4&amp;4.5</b> | <b>4.5</b> | <b>4.0 Algorithm result</b> | <b>4.0 Assessor's Judgement</b> | <b>4.0 General note</b> | <b>4.0 Optional Quest</b> |
| 3  |                                             | N          |                     | NA         |                             | NA         | Low                         | Low                             |                         |                           |
| 4  |                                             | Y          |                     | N          |                             | NA         | Low                         | Low                             |                         |                           |
| 5  |                                             | N          |                     | NA         |                             | NA         | Low                         | Low                             |                         |                           |
| 6  |                                             | N          |                     | NA         |                             | NA         | Low                         | Low                             |                         |                           |
| 7  |                                             | N          |                     | NA         |                             | NA         | Low                         | Low                             |                         |                           |
| 8  |                                             | NI         |                     | N          |                             | NA         | Low                         | Low                             |                         |                           |
| 9  |                                             | NI         |                     | N          |                             | NA         | Low                         | Low                             |                         |                           |
| 10 |                                             | N          |                     | NA         |                             | NA         | Low                         | Low                             |                         |                           |
| 11 |                                             | PY         |                     | PN         |                             | NA         | Low                         | Low                             |                         |                           |
| 12 |                                             | NI         |                     | PN         |                             | NA         | Low                         | Low                             |                         |                           |
| 13 |                                             | NI         |                     | N          |                             | NA         | Low                         | Low                             |                         |                           |
| 14 |                                             | Y          |                     | N          |                             | NA         | Low                         | Low                             |                         |                           |
| 15 |                                             | NI         |                     | NI         |                             | NI         | High                        | High                            |                         |                           |
| 16 |                                             | NI         |                     | PY         |                             | PY         | High                        | High                            |                         |                           |

|    | BQ                    | BR                                         | BS           | BT  | BU           | BV  | BW           | BX                   | BY                       | BZ          |
|----|-----------------------|--------------------------------------------|--------------|-----|--------------|-----|--------------|----------------------|--------------------------|-------------|
| 1  |                       | Domain 5. Selection of the reported result |              |     |              |     |              |                      |                          |             |
| 2  | 4.0 Note for optional | 5.1                                        | Note for 5.1 | 5.2 | Note for 5.2 | 5.3 | Note for 5.3 | 5.0 Algorithm result | 5.0 Assessor's Judgement | 5.0 General |
| 3  |                       | Y                                          |              | N   |              | N   |              | Low                  | Low                      |             |
| 4  |                       | NI                                         |              | N   |              | PN  |              | Some concerns        | Some concerns            |             |
| 5  |                       | Y                                          |              | N   |              | N   |              | Low                  | Low                      |             |
| 6  |                       | PY                                         |              | N   |              | PN  |              | Low                  | Low                      |             |
| 7  |                       | PY                                         |              | PN  |              | PN  |              | Low                  | Low                      |             |
| 8  |                       | NI                                         |              | N   |              | PY  |              | High                 | High                     |             |
| 9  |                       | Y                                          |              | N   |              | N   |              | Low                  | Low                      |             |
| 10 |                       | N                                          |              | N   |              | N   |              | Some concerns        | Some concerns            |             |
| 11 |                       | PY                                         |              | PN  |              | PN  |              | Low                  | Low                      |             |
| 12 |                       | PY                                         |              | PN  |              | PN  |              | Low                  | Low                      |             |
| 13 |                       | Y                                          |              | N   |              | N   |              | Low                  | Low                      |             |
| 14 |                       | Y                                          |              | N   |              | N   |              | Low                  | Low                      |             |
| 15 |                       | Y                                          |              | N   |              | N   |              | Low                  | Low                      |             |
| 16 |                       | PY                                         |              | N   |              | N   |              | Low                  | Low                      |             |



|    | CA                        | CB                          | CC                               | CD                              | CE                      | CF                           | CG                        | CH |  |
|----|---------------------------|-----------------------------|----------------------------------|---------------------------------|-------------------------|------------------------------|---------------------------|----|--|
| 1  |                           |                             | <b>Domain 6. Overall Bias</b>    |                                 |                         |                              |                           |    |  |
|    | <b>5.0 Optional Quest</b> | <b>5.0 Note for optiona</b> | <b>Algorithm's overall Judge</b> | <b>Assessor's overall Judge</b> | <b>6.0 General Note</b> | <b>6.0 Optional Question</b> | <b>6.0 Note for optio</b> |    |  |
| 2  |                           |                             |                                  |                                 |                         |                              |                           |    |  |
| 3  |                           |                             | Low                              | Low                             |                         |                              |                           |    |  |
| 4  |                           |                             | High                             | High                            |                         |                              |                           |    |  |
| 5  |                           |                             | High                             | High                            |                         |                              |                           |    |  |
| 6  |                           |                             | High                             | High                            |                         |                              |                           |    |  |
| 7  |                           |                             | Low                              | Low                             |                         |                              |                           |    |  |
| 8  |                           |                             | High                             | High                            |                         |                              |                           |    |  |
| 9  |                           |                             | High                             | High                            |                         |                              |                           |    |  |
| 10 |                           |                             | Some concerns                    | Some concerns                   |                         |                              |                           |    |  |
| 11 |                           |                             | Some concerns                    | Some concerns                   |                         |                              |                           |    |  |
| 12 |                           |                             | Some concerns                    | Some concerns                   |                         |                              |                           |    |  |
| 13 |                           |                             | Low                              | Low                             |                         |                              |                           |    |  |
| 14 |                           |                             | Low                              | Low                             |                         |                              |                           |    |  |
| 15 |                           |                             | High                             | High                            |                         |                              |                           |    |  |
| 16 |                           |                             | High                             | High                            |                         |                              |                           |    |  |

|    | Cl |
|----|----|
| 1  |    |
| 2  |    |
| 3  |    |
| 4  |    |
| 5  |    |
| 6  |    |
| 7  |    |
| 8  |    |
| 9  |    |
| 10 |    |
| 11 |    |
| 12 |    |
| 13 |    |
| 14 |    |
| 15 |    |
| 16 |    |

Revised Cochrane risk-of-bias tool for randomized trials (RoB 2)  
TEMPLATE FOR COMPLETION

Edited by Julian PT Higgins, Jelena Savović, Matthew J Page, Jonathan AC Sterne  
on behalf of the RoB2 Development Group

**Version of 22 August 2019**

**Low Risk**

The development of the RoB 2 tool was supported by the MRC Network of Hubs for Trials Methodology Research (MR/L004933/2- N61), with the support of the host MRC ConDuCT-II Hub (Collaboration and innovation for Difficult and Complex randomised controlled Trials In Invasive procedures - MR/K025643/1), by MRC research grant MR/M025209/1, and by a grant from The Cochrane Collaboration.

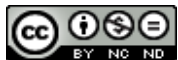

This work is licensed under a [Creative Commons Attribution-NonCommercial-NoDerivatives 4.0 International License](https://creativecommons.org/licenses/by-nc-nd/4.0/).

## Study details

### Reference

Zand, N. and Ataie-fashtami, L. (2009) 'Relieving pain in minor aphthous stomatitis by a single session of non-thermal carbon dioxide laser irradiation', pp. 515–520. doi: 10.1007/s10103-008-0555-1.

### Study design

- Individually-randomized parallel-group trial
- Cluster-randomized parallel-group trial
- Individually randomized cross-over (or other matched) trial

### For the purposes of this assessment, the interventions being compared are defined as

Experimental:

CO2 Laser

Comparator:

Placebo

### Specify which outcome is being assessed for risk of bias

Pain score

**Specify the numerical result being assessed.** In case of multiple alternative analyses being presented, specify the numeric result (e.g. RR = 1.52 (95% CI 0.83 to 2.77) and/or a reference (e.g. to a table, figure or paragraph) that uniquely defines the result being assessed.

Figure 1 95% confidence interval for mean score or idiopathic pain (VAS) in the placebo and laser groups

### Is the review team's aim for this result...?

- to assess the effect of *assignment to intervention* (the 'intention-to-treat' effect)
- to assess the effect of *adhering to intervention* (the 'per-protocol' effect)

**If the aim is to assess the effect of *adhering to intervention*, select the deviations from intended intervention that should be addressed (at least one must be checked):**

- occurrence of non-protocol interventions
- failures in implementing the intervention that could have affected the outcome
- non-adherence to their assigned intervention by trial participants

**Which of the following sources were obtained to help inform the risk-of-bias assessment? (tick as many as apply)**

- Journal article(s) with results of the trial
- Trial protocol
- Statistical analysis plan (SAP)
- Non-commercial trial registry record (e.g. ClinicalTrials.gov record)
- Company-owned trial registry record (e.g. GSK Clinical Study Register record)
- "Grey literature" (e.g. unpublished thesis)
- Conference abstract(s) about the trial
- Regulatory document (e.g. Clinical Study Report, Drug Approval Package)
- Research ethics application
- Grant database summary (e.g. NIH RePORTER or Research Councils UK Gateway to Research)
- Personal communication with trialist
- Personal communication with the sponsor

## Risk of bias assessment

Responses underlined in green are potential markers for low risk of bias, and responses in **red** are potential markers for a risk of bias. Where questions relate only to sign posts to other questions, no formatting is used.

### Domain 1: Risk of bias arising from the randomization process

| Signalling questions                                                                                       | Comments                                                                                                                                                                   | Response options                                                                               |
|------------------------------------------------------------------------------------------------------------|----------------------------------------------------------------------------------------------------------------------------------------------------------------------------|------------------------------------------------------------------------------------------------|
| 1.1 Was the allocation sequence random?                                                                    | In each patient, one of the aphthous ulcers was randomly allocated to be treated with laser, and the other one served as a placebo.                                        | <u>Y</u> / PY / PN / N / NI                                                                    |
| 1.2 Was the allocation sequence concealed until participants were enrolled and assigned to interventions?  | The study was designed so that the patients did not know which of the lesions was going to be treated by laser.                                                            | Y / <u>APY</u> / PN / N / NI                                                                   |
| 1.3 Did baseline differences between intervention groups suggest a problem with the randomization process? | There was no statistically significant difference in baseline idiopathic and contact pain between the laser group and the placebo group (P=0.11 and P=0.08, respectively). | Y / PY / <u>PN</u> / N / NI                                                                    |
| Risk-of-bias judgement                                                                                     | randomization, patient was blinded so the VAS assessment will not be affected, no significant difference on baseline statistically                                         | <u>Low</u> / High / Some concerns                                                              |
| Optional: What is the predicted direction of bias arising from the randomization process?                  | -                                                                                                                                                                          | NA / Favours experimental / Favours comparator / Towards null / Away from null / Unpredictable |

Domain 2: Risk of bias due to deviations from the intended interventions (*effect of assignment to intervention*)

| Signalling questions                                                                                                                                                           | Comments                                                                                                                                                                                                                                                                                                              | Response options                                                                               |
|--------------------------------------------------------------------------------------------------------------------------------------------------------------------------------|-----------------------------------------------------------------------------------------------------------------------------------------------------------------------------------------------------------------------------------------------------------------------------------------------------------------------|------------------------------------------------------------------------------------------------|
| 2.1. Were participants aware of their assigned intervention during the trial?                                                                                                  | In each patient the placebo lesion was irradiated with the same laser, but with an inactive probe. The study was designed so that the patients did not know which of the lesions was going to be treated by laser<br><br>Operator might not be blinded because responsible in delivering laser treatment and placebo. | Y / PY / <u>PN</u> / NI                                                                        |
| 2.2. Were carers and people delivering the interventions aware of participants' assigned intervention during the trial?                                                        |                                                                                                                                                                                                                                                                                                                       | <u>Y</u> / PY / <u>PN</u> / N / NI                                                             |
| 2.3. If <u>Y/PY/NI</u> to 2.1 or 2.2: Were there deviations from the intended intervention that arose because of the trial context?                                            | Not informed not but very unlikely to happened since the assessment was using VAS based on patient perception of pain, meanwhile the patients were blinded from the treatment.                                                                                                                                        | NA / Y / PY / <u>PN</u> / NI                                                                   |
| 2.4. If <u>Y/PY</u> to 2.3: Were these deviations likely to have affected the outcome?                                                                                         | -                                                                                                                                                                                                                                                                                                                     | NA / Y / PY / <u>PN</u> / NI                                                                   |
| 2.5. If <u>Y/PY/NI</u> to 2.4: Were these deviations from intended intervention balanced between groups?                                                                       | -                                                                                                                                                                                                                                                                                                                     | <u>NA</u> / <u>Y</u> / PY / PN / N / NI                                                        |
| 2.6. Was an appropriate analysis used to estimate the effect of assignment to intervention?                                                                                    | The results were expressed as means ± standard deviations. Statistical significance was tested with Student's t-test for paired samples.                                                                                                                                                                              | <u>Y</u> / PY / PN / N / NI                                                                    |
| 2.7. If <u>N/PN/NI</u> to 2.6: Was there potential for a substantial impact (on the result) of the failure to analyse participants in the group to which they were randomized? | -                                                                                                                                                                                                                                                                                                                     | NA / Y / PY / <u>PN</u> / NI                                                                   |
| Risk-of-bias judgement                                                                                                                                                         |                                                                                                                                                                                                                                                                                                                       | <u>Low</u> / High / Some concerns                                                              |
| Optional: What is the predicted direction of bias due to deviations from intended interventions?                                                                               | -                                                                                                                                                                                                                                                                                                                     | NA / Favours experimental / Favours comparator / Towards null / Away from null / Unpredictable |

Domain 2: Risk of bias due to deviations from the intended interventions (*effect of adhering to intervention*)

| Signalling questions                                                                                                                              | Comments | Response options                                                                               |
|---------------------------------------------------------------------------------------------------------------------------------------------------|----------|------------------------------------------------------------------------------------------------|
| 2.1. Were participants aware of their assigned intervention during the trial?                                                                     |          | Y / PY / <u>PN / N</u> / NI                                                                    |
| 2.2. Were carers and people delivering the interventions aware of participants' assigned intervention during the trial?                           |          | Y / PY / <u>PN / N</u> / NI                                                                    |
| 2.3. [If applicable:] <u>If Y/PY/NI to 2.1 or 2.2:</u> Were important non-protocol interventions balanced across intervention groups?             |          | NA / <u>Y / PY</u> / PN / N / NI                                                               |
| 2.4. [If applicable:] Were there failures in implementing the intervention that could have affected the outcome?                                  |          | NA / Y / PY / <u>PN / N</u> / NI                                                               |
| 2.5. [If applicable:] Was there non-adherence to the assigned intervention regimen that could have affected participants' outcomes?               |          | NA / Y / PY / <u>PN / N</u> / NI                                                               |
| 2.6. <u>If N/PN/NI to 2.3, or Y/PY/NI to 2.4 or 2.5:</u> Was an appropriate analysis used to estimate the effect of adhering to the intervention? |          | NA / <u>Y / PY</u> / PN / N / NI                                                               |
| Risk-of-bias judgement                                                                                                                            |          | Low / High / Some concerns                                                                     |
| Optional: What is the predicted direction of bias due to deviations from intended interventions?                                                  |          | NA / Favours experimental / Favours comparator / Towards null / Away from null / Unpredictable |



Domain 3: Missing outcome data

| Signalling questions                                                                                           | Comments                                                                                            | Response options                                                                                                                                             |
|----------------------------------------------------------------------------------------------------------------|-----------------------------------------------------------------------------------------------------|--------------------------------------------------------------------------------------------------------------------------------------------------------------|
| <b>3.1 Were data for this outcome available for all, or nearly all, participants randomized?</b>               | Fifteen adults (13 women and two men) with 30 minor aphthous lesions completed the study. (Table 1) | <input checked="" type="checkbox"/> Y / <input type="checkbox"/> PY / <input type="checkbox"/> PN / <input type="checkbox"/> N / <input type="checkbox"/> NI |
| <b>3.2 If <u>N/PN/NI</u> to 3.1: Is there evidence that the result was not biased by missing outcome data?</b> | -                                                                                                   | NA / <input type="checkbox"/> Y / <input type="checkbox"/> PY / <input type="checkbox"/> PN / <input type="checkbox"/> N                                     |
| <b>3.3 If <u>N/PN</u> to 3.2: Could missingness in the outcome depend on its true value?</b>                   | -                                                                                                   | NA / <input type="checkbox"/> Y / <input type="checkbox"/> PY / <input type="checkbox"/> PN / <input type="checkbox"/> N / <input type="checkbox"/> NI       |
| <b>3.4 If <u>Y/PY/NI</u> to 3.3: Is it likely that missingness in the outcome depended on its true value?</b>  | -                                                                                                   | NA / <input type="checkbox"/> Y / <input type="checkbox"/> PY / <input type="checkbox"/> PN / <input type="checkbox"/> N / <input type="checkbox"/> NI       |
| <b>Risk-of-bias judgement</b>                                                                                  | All participant met inclusion criteria had completed the study.                                     | <input checked="" type="checkbox"/> Low / High / Some concerns                                                                                               |
| Optional: What is the predicted direction of bias due to missing outcome data?                                 | -                                                                                                   | NA / Favours experimental / Favours comparator / Towards null / Away from null / Unpredictable                                                               |

Domain 4: Risk of bias in measurement of the outcome

| Signalling questions                                                                                                            | Comments                                                                                                                                                                                                                                                                                                                                                                                              | Response options                                                                               |
|---------------------------------------------------------------------------------------------------------------------------------|-------------------------------------------------------------------------------------------------------------------------------------------------------------------------------------------------------------------------------------------------------------------------------------------------------------------------------------------------------------------------------------------------------|------------------------------------------------------------------------------------------------|
| 4.1 Was the method of measuring the outcome inappropriate?                                                                      | The patients were requested to grade the contact and idiopathic (non-contact) pain of their ulcers on a horizontal, 10 cm, visual analog scale (VAS) before and immediately after laser treatment. In addition, these scores were also recorded post-operatively at 4 h, 8 h, 12 h, 24 h, 48 h, 72 h and 96 h. VAS=0 represented no pain and VAS=10 was used to describe maximum and unbearable pain. | Y / PY / <u>PN</u> / <u>N</u> / NI                                                             |
| 4.2 Could measurement or ascertainment of the outcome have differed between intervention groups?                                | No because intervention was performed based on patient was blinded to the intervention.                                                                                                                                                                                                                                                                                                               | Y / PY / <u>PN</u> / <u>N</u> / NI                                                             |
| 4.3 If <u>N/PN/NI</u> to 4.1 and 4.2: Were outcome assessors aware of the intervention received by study participants?          | The study was designed so that the patients did not know which of the lesions was going to be treated by laser.                                                                                                                                                                                                                                                                                       | NA / Y / PY / <u>PN</u> / <u>N</u> / NI                                                        |
| 4.4 If <u>Y/PY/NI</u> to 4.3: Could assessment of the outcome have been influenced by knowledge of intervention received?       | -                                                                                                                                                                                                                                                                                                                                                                                                     | NA / Y / PY / <u>PN</u> / <u>N</u> / NI                                                        |
| 4.5 If <u>Y/PY/NI</u> to 4.4: Is it likely that assessment of the outcome was influenced by knowledge of intervention received? | -                                                                                                                                                                                                                                                                                                                                                                                                     | NA / Y / PY / <u>PN</u> / <u>N</u> / NI                                                        |
| Risk-of-bias judgement                                                                                                          | Participant assessed their own pain and was blinded to the intervention so it is very unlikely biased.                                                                                                                                                                                                                                                                                                | <u>Low</u> / High / Some concerns                                                              |
| Optional: What is the predicted direction of bias in measurement of the outcome?                                                | -                                                                                                                                                                                                                                                                                                                                                                                                     | NA / Favours experimental / Favours comparator / Towards null / Away from null / Unpredictable |

Domain 5: Risk of bias in selection of the reported result

| Signalling questions                                                                                                                                                                       | Comments                                                                                                                                                     | Response options                                                                               |
|--------------------------------------------------------------------------------------------------------------------------------------------------------------------------------------------|--------------------------------------------------------------------------------------------------------------------------------------------------------------|------------------------------------------------------------------------------------------------|
| <b>5.1 Were the data that produced this result analysed in accordance with a pre-specified analysis plan that was finalized before unblinded outcome data were available for analysis?</b> | Statistical significance was tested with Student's t-test for paired samples. The level of statistical significance was set at a two-tailed P value of 0.05. | <input checked="" type="checkbox"/> Y / PY / PN / N / NI                                       |
| <b>Is the numerical result being assessed likely to have been selected, on the basis of the results, from...</b>                                                                           |                                                                                                                                                              |                                                                                                |
| <b>5.2. ... multiple eligible outcome measurements (e.g. scales, definitions, time points) within the outcome domain?</b>                                                                  | Only VAS. recorded post-operatively at 4 h, 8 h, 12 h, 24 h, 48 h, 72 h and 96 h.                                                                            | Y / PY / PN / <input checked="" type="checkbox"/> NI / NI                                      |
| <b>5.3 ... multiple eligible analyses of the data?</b>                                                                                                                                     | Only assessing difference of vas score before and after laser treatment. Statistical significance was tested with Student's t-test for paired samples.       | Y / PY / PN / <input checked="" type="checkbox"/> NI / NI                                      |
| <b>Risk-of-bias judgement</b>                                                                                                                                                              |                                                                                                                                                              | <input checked="" type="checkbox"/> Low / High / Some concerns                                 |
| Optional: What is the predicted direction of bias due to selection of the reported result?                                                                                                 |                                                                                                                                                              | NA / Favours experimental / Favours comparator / Towards null / Away from null / Unpredictable |

Overall risk of bias

|                                                                             |                    |                                                                                                |
|-----------------------------------------------------------------------------|--------------------|------------------------------------------------------------------------------------------------|
| <b>Risk-of-bias judgement</b>                                               | Low in all domain. | Low / High / Some concerns                                                                     |
| Optional: What is the overall predicted direction of bias for this outcome? |                    | NA / Favours experimental / Favours comparator / Towards null / Away from null / Unpredictable |

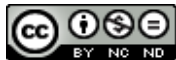

This work is licensed under a [Creative Commons Attribution-NonCommercial-NoDerivatives 4.0 International License](https://creativecommons.org/licenses/by-nc-nd/4.0/).

Revised Cochrane risk-of-bias tool for randomized trials (RoB 2)  
TEMPLATE FOR COMPLETION

Some Concern

Edited by Julian PT Higgins, Jelena Savović, Matthew J Page, Jonathan AC Sterne  
on behalf of the RoB2 Development Group

**Version of 22 August 2019**

The development of the RoB 2 tool was supported by the MRC Network of Hubs for Trials Methodology Research (MR/L004933/2- N61), with the support of the host MRC ConDuCT-II Hub (Collaboration and innovation for Difficult and Complex randomised controlled Trials In Invasive procedures - MR/K025643/1), by MRC research grant MR/M025209/1, and by a grant from The Cochrane Collaboration.



This work is licensed under a [Creative Commons Attribution-NonCommercial-NoDerivatives 4.0 International License](https://creativecommons.org/licenses/by-nc-nd/4.0/).

## Study details

### Reference

De Souza TOF, Martins MAT, Bussadori SK, Fernandes KPS, Tanji EY, Mesquita-Ferrari RA, et al. Clinical evaluation of low-level laser treatment for recurring aphthous stomatitis. *Photomed Laser Surg.* 2010;28(SUPPL. 2):10–3.

### Study design

- Individually-randomized parallel-group trial
- Cluster-randomized parallel-group trial
- Individually randomized cross-over (or other matched) trial

### For the purposes of this assessment, the interventions being compared are defined as

Experimental: InGalP Laser

Comparator: Triamcinolone acetonide

### Specify which outcome is being assessed for risk of bias

Pain score

**Specify the numerical result being assessed.** In case of multiple alternative analyses being presented, specify the numeric result (e.g. RR = 1.52 (95% CI 0.83 to 2.77) and/or a reference (e.g. to a table, figure or paragraph) that uniquely defines the result being assessed.

The majority of the patients (n = 17; p < 0.0001) reported severe symptoms at the first evaluation.

The results revealed no significant difference in RAS regression time between the patients treated with corticoid agent and those treated with laser (p = 0.4345).

### Is the review team's aim for this result...?

- to assess the effect of *assignment to intervention* (the 'intention-to-treat' effect)
- to assess the effect of *adhering to intervention* (the 'per-protocol' effect)

If the aim is to assess the effect of *adhering to intervention*, select the deviations from intended intervention that should be addressed (at least one must be checked):

- occurrence of non-protocol interventions
- failures in implementing the intervention that could have affected the outcome
- non-adherence to their assigned intervention by trial participants

Which of the following sources were obtained to help inform the risk-of-bias assessment? (tick as many as apply)

- Journal article(s) with results of the trial
- Trial protocol
- Statistical analysis plan (SAP)
- Non-commercial trial registry record (e.g. ClinicalTrials.gov record)
- Company-owned trial registry record (e.g. GSK Clinical Study Register record)
- "Grey literature" (e.g. unpublished thesis)
- Conference abstract(s) about the trial
- Regulatory document (e.g. Clinical Study Report, Drug Approval Package)
- Research ethics application
- Grant database summary (e.g. NIH RePORTER or Research Councils UK Gateway to Research)
- Personal communication with trialist
- Personal communication with the sponsor

## Risk of bias assessment

Responses underlined in green are potential markers for low risk of bias, and responses in **red** are potential markers for a risk of bias. Where questions relate only to sign posts to other questions, no formatting is used.

### Domain 1: Risk of bias arising from the randomization process

| Signalling questions                                                                                       | Comments                                                                                                                                          | Response options                                                                               |
|------------------------------------------------------------------------------------------------------------|---------------------------------------------------------------------------------------------------------------------------------------------------|------------------------------------------------------------------------------------------------|
| 1.1 Was the allocation sequence random?                                                                    | The patients were randomly selected, and among 40 patients who began treatment,                                                                   | <u>Y</u> / PY / PN / N / NI                                                                    |
| 1.2 Was the allocation sequence concealed until participants were enrolled and assigned to interventions?  | Not reported.                                                                                                                                     | Y / <u>PY</u> / PN / N / NI                                                                    |
| 1.3 Did baseline differences between intervention groups suggest a problem with the randomization process? | Majority of patients reported severe symptoms at the first evaluation.                                                                            | Y / PY / <u>PN</u> / N / <u>NI</u>                                                             |
| Risk-of-bias judgement                                                                                     | No information whether patient enrolled were aware of intertention that might influence the self-assessed outcome so this should be some concern. | Low / High / <u>Some concerns</u>                                                              |
| Optional: What is the predicted direction of bias arising from the randomization process?                  | -                                                                                                                                                 | NA / Favours experimental / Favours comparator / Towards null / Away from null / Unpredictable |



Domain 2: Risk of bias due to deviations from the intended interventions (*effect of assignment to intervention*)

| Signalling questions                                                                                                                                                           | Comments                                                                                                                                                                                                                                                                                                                                                                                                   | Response options                                                                               |
|--------------------------------------------------------------------------------------------------------------------------------------------------------------------------------|------------------------------------------------------------------------------------------------------------------------------------------------------------------------------------------------------------------------------------------------------------------------------------------------------------------------------------------------------------------------------------------------------------|------------------------------------------------------------------------------------------------|
| 2.1. Were participants aware of their assigned intervention during the trial?                                                                                                  | No information.                                                                                                                                                                                                                                                                                                                                                                                            | Y / PY / <u>PN / N</u> / <u>NI</u>                                                             |
| 2.2. Were carers and people delivering the interventions aware of participants' assigned intervention during the trial?                                                        | No information but probably yes.                                                                                                                                                                                                                                                                                                                                                                           | Y / PY / <u>PN / N</u> / <u>NI</u>                                                             |
| 2.3. If <u>Y/PY/NI</u> to 2.1 or 2.2: Were there deviations from the intended intervention that arose because of the trial context?                                            | No information.                                                                                                                                                                                                                                                                                                                                                                                            | NA / Y / PY / <u>PN / N</u> / <u>NI</u>                                                        |
| 2.4. If <u>Y/PY</u> to 2.3: Were these deviations likely to have affected the outcome?                                                                                         | No information                                                                                                                                                                                                                                                                                                                                                                                             | NA / Y / PY / <u>PN / N</u> / <u>NI</u>                                                        |
| 2.5. If <u>Y/PY/NI</u> to 2.4: Were these deviations from intended intervention balanced between groups?                                                                       | -                                                                                                                                                                                                                                                                                                                                                                                                          | NA / <u>Y</u> / PY / PN / N / NI                                                               |
| 2.6. Was an appropriate analysis used to estimate the effect of assignment to intervention?                                                                                    | Statistical analysis of the data was performed by using tests for proportions for gender, predisposing factors for RAS, duration of time intervals between recurrences, symptoms, and lesions. A contingency table was used for the comparison between regression times in both groups, by using Fisher's Exact test. The level of significance was set at 5% of probability or the corresponding p value. | <u>Y / PY</u> / PN / N / <u>NI</u>                                                             |
| 2.7. If <u>N/PN/NI</u> to 2.6: Was there potential for a substantial impact (on the result) of the failure to analyse participants in the group to which they were randomized? | -                                                                                                                                                                                                                                                                                                                                                                                                          | NA / Y / PY / <u>PN / N</u> / <u>NI</u>                                                        |
| Risk-of-bias judgement                                                                                                                                                         |                                                                                                                                                                                                                                                                                                                                                                                                            | Low / High / <u>Some concerns</u>                                                              |
| Optional: What is the predicted direction of bias due to deviations from intended interventions?                                                                               |                                                                                                                                                                                                                                                                                                                                                                                                            | NA / Favours experimental / Favours comparator / Towards null / Away from null / Unpredictable |

Domain 2: Risk of bias due to deviations from the intended interventions (*effect of adhering to intervention*)

| Signalling questions                                                                                                                              | Comments | Response options                                                                               |
|---------------------------------------------------------------------------------------------------------------------------------------------------|----------|------------------------------------------------------------------------------------------------|
| 2.1. Were participants aware of their assigned intervention during the trial?                                                                     |          | Y / PY / <u>PN / N</u> / NI                                                                    |
| 2.2. Were carers and people delivering the interventions aware of participants' assigned intervention during the trial?                           |          | Y / PY / <u>PN / N</u> / NI                                                                    |
| 2.3. [If applicable:] <u>If Y/PY/NI to 2.1 or 2.2:</u> Were important non-protocol interventions balanced across intervention groups?             |          | NA / <u>Y / PY</u> / PN / N / NI                                                               |
| 2.4. [If applicable:] Were there failures in implementing the intervention that could have affected the outcome?                                  |          | NA / Y / PY / <u>PN / N</u> / NI                                                               |
| 2.5. [If applicable:] Was there non-adherence to the assigned intervention regimen that could have affected participants' outcomes?               |          | NA / Y / PY / <u>PN / N</u> / NI                                                               |
| 2.6. <u>If N/PN/NI to 2.3, or Y/PY/NI to 2.4 or 2.5:</u> Was an appropriate analysis used to estimate the effect of adhering to the intervention? |          | NA / <u>Y / PY</u> / PN / N / NI                                                               |
| Risk-of-bias judgement                                                                                                                            |          | Low / High / Some concerns                                                                     |
| Optional: What is the predicted direction of bias due to deviations from intended interventions?                                                  |          | NA / Favours experimental / Favours comparator / Towards null / Away from null / Unpredictable |

Domain 3: Missing outcome data

| Signalling questions                                                                                           | Comments                                                                                                                                                                                                                                             | Response options                                                                                  |
|----------------------------------------------------------------------------------------------------------------|------------------------------------------------------------------------------------------------------------------------------------------------------------------------------------------------------------------------------------------------------|---------------------------------------------------------------------------------------------------|
| <b>3.1 Were data for this outcome available for all, or nearly all, participants randomized?</b>               | No. Twenty participant completed the intervention.                                                                                                                                                                                                   | <input checked="" type="checkbox"/> Y / PY / PN / N / NI                                          |
| <b>3.2 If <u>N/PN/NI</u> to 3.1: Is there evidence that the result was not biased by missing outcome data?</b> | The patients were randomly selected, and among 40 patients who began treatment, only 20 completed he protocol. These were allocated into two groups: Group I, treatment with topical corticoid (n ¼ 5); and Group II, treatment with laser (n ¼ 15). | NA / <input checked="" type="checkbox"/> Y / PY / PN / N                                          |
| <b>3.3 If <u>N/PN</u> to 3.2: Could missingness in the outcome depend on its true value?</b>                   | No because the participant did not complete the intervention protocol.                                                                                                                                                                               | NA / <input checked="" type="checkbox"/> Y / PY / <input checked="" type="checkbox"/> PN / N / NI |
| <b>3.4 If <u>Y/PY/NI</u> to 3.3: Is it likely that missingness in the outcome depended on its true value?</b>  | -                                                                                                                                                                                                                                                    | NA / <input checked="" type="checkbox"/> Y / PY / <input checked="" type="checkbox"/> PN / N / NI |
| <b>Risk-of-bias judgement</b>                                                                                  | Some concern because number of participant in two group was different.                                                                                                                                                                               | <input checked="" type="checkbox"/> Low / High / Some concerns                                    |
| Optional: What is the predicted direction of bias due to missing outcome data?                                 | -                                                                                                                                                                                                                                                    | NA / Favours experimental / Favours comparator / Towards null / Away from null / Unpredictable    |

Domain 4: Risk of bias in measurement of the outcome

| Signalling questions                                                                                                            | Comments                                                                                                                                                                                          | Response options                                                                               |
|---------------------------------------------------------------------------------------------------------------------------------|---------------------------------------------------------------------------------------------------------------------------------------------------------------------------------------------------|------------------------------------------------------------------------------------------------|
| 4.1 Was the method of measuring the outcome inappropriate?                                                                      | pain intensity before and after therapy: 0 (no pain), 1 (mild pain), 2 (moderate pain), and 3 (severe pain). The measurement of lesion size was determined every day, by using a millimeter ruler | Y / PY / <u>PN / N</u> / NI                                                                    |
| 4.2 Could measurement or ascertainment of the outcome have differed between intervention groups?                                | No because measurement had been defined.                                                                                                                                                          | Y / PY / <u>PN</u> / N / NI                                                                    |
| 4.3 If <u>N/PN/NI</u> to 4.1 and 4.2: Were outcome assessors aware of the intervention received by study participants?          | Since it was self assessed, it was not informed in the article whether patient was aware there are two different treatment.                                                                       | NA <u>Y</u> / PY / <u>PN / N</u> / NI                                                          |
| 4.4 If <u>Y/PY/NI</u> to 4.3: Could assessment of the outcome have been influenced by knowledge of intervention received?       | Probably no since patient would assess pain intensity on their own.                                                                                                                               | NA / Y / PY / <u>PN / N</u> / NI                                                               |
| 4.5 If <u>Y/PY/NI</u> to 4.4: Is it likely that assessment of the outcome was influenced by knowledge of intervention received? | -                                                                                                                                                                                                 | NA / Y / PY / <u>PN</u> / N / NI                                                               |
| Risk-of-bias judgement                                                                                                          | Although patient will report the outcome based on the pain they experience, it would be less bias if the patient not know the intervention they receive.                                          | Low / High / <u>Some concerns</u>                                                              |
| Optional: What is the predicted direction of bias in measurement of the outcome?                                                | -                                                                                                                                                                                                 | NA / Favours experimental / Favours comparator / Towards null / Away from null / Unpredictable |

Domain 5: Risk of bias in selection of the reported result

| Signalling questions                                                                                                                                                                              | Comments                                                                                                                                                                                                              | Response options                                                                                      |
|---------------------------------------------------------------------------------------------------------------------------------------------------------------------------------------------------|-----------------------------------------------------------------------------------------------------------------------------------------------------------------------------------------------------------------------|-------------------------------------------------------------------------------------------------------|
| <p><b>5.1 Were the data that produced this result analysed in accordance with a pre-specified analysis plan that was finalized before unblinded outcome data were available for analysis?</b></p> | <p>Yes. contingency table was used for the comparison between regression times in both groups, by using Fisher's Exact test. The level of significance was set at 5% of probability or the corresponding p value.</p> | <p><u>Y</u> / <u>PY</u> / <u>PN</u> / <u>N</u> / <u>NI</u></p>                                        |
| <p><b>Is the numerical result being assessed likely to have been selected, on the basis of the results, from...</b></p>                                                                           |                                                                                                                                                                                                                       |                                                                                                       |
| <p><b>5.2. ... multiple eligible outcome measurements (e.g. scales, definitions, time points) within the outcome domain?</b></p>                                                                  | <p>No, pain intensity to assess changes before and after intervention. Lesion regression time for healing time of the ulcer.</p>                                                                                      | <p><u>Y</u> / <u>PY</u> / <u>PN</u> / <u>N</u> / <u>NI</u></p>                                        |
| <p><b>5.3 ... multiple eligible analyses of the data?</b></p>                                                                                                                                     | <p>No. Only comparison between regression times in both groups</p>                                                                                                                                                    | <p><u>Y</u> / <u>PY</u> / <u>PN</u> / <u>N</u> / <u>NI</u></p>                                        |
| <p><b>Risk-of-bias judgement</b></p>                                                                                                                                                              | <p>Only reported pain intensity before treatment and only mention that there was regression in pain in the same session. But no comparison between intervention group.</p>                                            | <p>Low / High / <u>Some concerns</u></p>                                                              |
| <p>Optional: What is the predicted direction of bias due to selection of the reported result?</p>                                                                                                 |                                                                                                                                                                                                                       | <p>NA / Favours experimental / Favours comparator / Towards null / Away from null / Unpredictable</p> |

Overall risk of bias

|                                                                             |  |                                                                                                |
|-----------------------------------------------------------------------------|--|------------------------------------------------------------------------------------------------|
| <b>Risk-of-bias judgement</b>                                               |  | Low / High / Some concerns                                                                     |
| Optional: What is the overall predicted direction of bias for this outcome? |  | NA / Favours experimental / Favours comparator / Towards null / Away from null / Unpredictable |



This work is licensed under a [Creative Commons Attribution-NonCommercial-NoDerivatives 4.0 International License](https://creativecommons.org/licenses/by-nc-nd/4.0/).

Revised Cochrane risk-of-bias tool for randomized trials (RoB 2)  
TEMPLATE FOR COMPLETION

Some Concern

Edited by Julian PT Higgins, Jelena Savović, Matthew J Page, Jonathan AC Sterne  
on behalf of the RoB2 Development Group

**Version of 22 August 2019**

The development of the RoB 2 tool was supported by the MRC Network of Hubs for Trials Methodology Research (MR/L004933/2- N61), with the support of the host MRC ConDuCT-II Hub (Collaboration and innovation for Difficult and Complex randomised controlled Trials In Invasive procedures - MR/K025643/1), by MRC research grant MR/M025209/1, and by a grant from The Cochrane Collaboration.



This work is licensed under a [Creative Commons Attribution-NonCommercial-NoDerivatives 4.0 International License](https://creativecommons.org/licenses/by-nc-nd/4.0/).

## Study details

### Reference

Zand N, Fateh M, Ataie-Fashtami L, Djavid GE, Fatemi SM, Shirkavand A. Promoting wound healing in minor recurrent aphthous stomatitis by non-thermal, non-ablative CO2 laser therapy: A pilot study. *Photomed Laser Surg.* 2012;30(12):719–23.

### Study design

- Individually-randomized parallel-group trial
- Cluster-randomized parallel-group trial
- Individually randomized cross-over (or other matched) trial

### For the purposes of this assessment, the interventions being compared are defined as

Experimental:

CO2

Comparator:

Placebo

### Specify which outcome is being assessed for risk of bias

Healing Time

**Specify the numerical result being assessed.** In case of multiple alternative analyses being presented, specify the numeric result (e.g. RR = 1.52 (95% CI 0.83 to 2.77) and/or a reference (e.g. to a table, figure or paragraph) that uniquely defines the result being assessed.

Healing time after treatment were 4.8 – 2.4 day in the laser group and 7.6 – 2.5 day in the placebo group, which was statistically significantly shorter in laser group (  $p = 0.02$ ) (Fig. 1).

### Is the review team's aim for this result...?

- to assess the effect of *assignment to intervention* (the 'intention-to-treat' effect)
- to assess the effect of *adhering to intervention* (the 'per-protocol' effect)



**If the aim is to assess the effect of *adhering to intervention*, select the deviations from intended intervention that should be addressed (at least one must be checked):**

- occurrence of non-protocol interventions
- failures in implementing the intervention that could have affected the outcome
- non-adherence to their assigned intervention by trial participants

**Which of the following sources were obtained to help inform the risk-of-bias assessment? (tick as many as apply)**

- Journal article(s) with results of the trial
- Trial protocol
- Statistical analysis plan (SAP)
- Non-commercial trial registry record (e.g. ClinicalTrials.gov record)
- Company-owned trial registry record (e.g. GSK Clinical Study Register record)
- "Grey literature" (e.g. unpublished thesis)
- Conference abstract(s) about the trial
- Regulatory document (e.g. Clinical Study Report, Drug Approval Package)
- Research ethics application
- Grant database summary (e.g. NIH RePORTER or Research Councils UK Gateway to Research)
- Personal communication with trialist
- Personal communication with the sponsor

## Risk of bias assessment

Responses underlined in green are potential markers for low risk of bias, and responses in **red** are potential markers for a risk of bias. Where questions relate only to sign posts to other questions, no formatting is used.

### Domain 1: Risk of bias arising from the randomization process

| Signalling questions                                                                                              | Comments                                                                                                                                                                                                                                                                                                                           | Response options                                                                               |
|-------------------------------------------------------------------------------------------------------------------|------------------------------------------------------------------------------------------------------------------------------------------------------------------------------------------------------------------------------------------------------------------------------------------------------------------------------------|------------------------------------------------------------------------------------------------|
| <b>1.1 Was the allocation sequence random?</b>                                                                    | Not informed.                                                                                                                                                                                                                                                                                                                      | <u>Y</u> / PY / PN / N / <b>NI</b>                                                             |
| <b>1.2 Was the allocation sequence concealed until participants were enrolled and assigned to interventions?</b>  | Not informed.                                                                                                                                                                                                                                                                                                                      | <u>Y</u> / <b>PY</b> / PN / N / NI                                                             |
| <b>1.3 Did baseline differences between intervention groups suggest a problem with the randomization process?</b> | The duration of lesions before enrolling in the study, were 2.2 – 0.42 and 2.5 – 0.71 days in laser and placebo groups, respectively, and there was no significant difference between study groups ( p = 0.26). in the size of lesions between the study groups (4.4 – 1.7 mm in laser group versus 4.4 – 1.4 mm in placebo group) | Y / PY / <b>PN</b> / <u>N</u> / NI                                                             |
| <b>Risk-of-bias judgement</b>                                                                                     | No information about randomization.                                                                                                                                                                                                                                                                                                | Low / High / <b>Some concerns</b>                                                              |
| Optional: What is the predicted direction of bias arising from the randomization process?                         |                                                                                                                                                                                                                                                                                                                                    | NA / Favours experimental / Favours comparator / Towards null / Away from null / Unpredictable |

Domain 2: Risk of bias due to deviations from the intended interventions (*effect of assignment to intervention*)

| Signalling questions                                                                                                                                                           | Comments                                                                                                                                       | Response options                                                                               |
|--------------------------------------------------------------------------------------------------------------------------------------------------------------------------------|------------------------------------------------------------------------------------------------------------------------------------------------|------------------------------------------------------------------------------------------------|
| 2.1. Were participants aware of their assigned intervention during the trial?                                                                                                  | Not informed.                                                                                                                                  | Y / PY / <b>PN</b> / N / NI                                                                    |
| 2.2. Were carers and people delivering the interventions aware of participants' assigned intervention during the trial?                                                        | Blinded physician                                                                                                                              | Y / PY / <b>PN</b> / <b>N</b> / NI                                                             |
| 2.3. If <b>Y/PY/NI</b> to 2.1 or 2.2: Were there deviations from the intended intervention that arose because of the trial context?                                            | -                                                                                                                                              | NA / Y / PY / <b>PN</b> / N / NI                                                               |
| 2.4. If <b>Y/PY</b> to 2.3: Were these deviations likely to have affected the outcome?                                                                                         | -                                                                                                                                              | NA / Y / PY / <b>PN</b> / N / NI                                                               |
| 2.5. If <b>Y/PY/NI</b> to 2.4: Were these deviations from intended intervention balanced between groups?                                                                       | -                                                                                                                                              | NA / <b>Y/PY</b> / <b>PN</b> / N / NI                                                          |
| 2.6. Was an appropriate analysis used to estimate the effect of assignment to intervention?                                                                                    | Statistical significance was tested using the Student's t test. The level of statistical significance was set at a two-tailed p-value of 0.05. | <b>Y</b> / <b>PN</b> / N / NI                                                                  |
| 2.7. If <b>N/PN/NI</b> to 2.6: Was there potential for a substantial impact (on the result) of the failure to analyse participants in the group to which they were randomized? | -                                                                                                                                              | NA / Y / PY / <b>PN</b> / N / NI                                                               |
| <b>Risk-of-bias judgement</b>                                                                                                                                                  | Since healing time was assessed by blinded physician it was very unlikely to be biased.                                                        | <b>Low</b> / High / Some concerns                                                              |
| Optional: What is the predicted direction of bias due to deviations from intended interventions?                                                                               | -                                                                                                                                              | NA / Favours experimental / Favours comparator / Towards null / Away from null / Unpredictable |

Domain 2: Risk of bias due to deviations from the intended interventions (*effect of adhering to intervention*)

| Signalling questions                                                                                                                              | Comments | Response options                                                                               |
|---------------------------------------------------------------------------------------------------------------------------------------------------|----------|------------------------------------------------------------------------------------------------|
| 2.1. Were participants aware of their assigned intervention during the trial?                                                                     |          | Y / PY / <u>PN / N</u> / NI                                                                    |
| 2.2. Were carers and people delivering the interventions aware of participants' assigned intervention during the trial?                           |          | Y / PY / <u>PN / N</u> / NI                                                                    |
| 2.3. [If applicable:] <u>If Y/PY/NI to 2.1 or 2.2:</u> Were important non-protocol interventions balanced across intervention groups?             |          | NA / <u>Y / PY</u> / PN / N / NI                                                               |
| 2.4. [If applicable:] Were there failures in implementing the intervention that could have affected the outcome?                                  |          | NA / Y / PY / <u>PN / N</u> / NI                                                               |
| 2.5. [If applicable:] Was there non-adherence to the assigned intervention regimen that could have affected participants' outcomes?               |          | NA / Y / PY / <u>PN / N</u> / NI                                                               |
| 2.6. <u>If N/PN/NI to 2.3, or Y/PY/NI to 2.4 or 2.5:</u> Was an appropriate analysis used to estimate the effect of adhering to the intervention? |          | NA / <u>Y / PY</u> / PN / N / NI                                                               |
| Risk-of-bias judgement                                                                                                                            |          | Low / High / Some concerns                                                                     |
| Optional: What is the predicted direction of bias due to deviations from intended interventions?                                                  |          | NA / Favours experimental / Favours comparator / Towards null / Away from null / Unpredictable |

Domain 3: Missing outcome data

| Signalling questions                                                                                           | Comments                                                                                                                                                                   | Response options                                                                               |
|----------------------------------------------------------------------------------------------------------------|----------------------------------------------------------------------------------------------------------------------------------------------------------------------------|------------------------------------------------------------------------------------------------|
| <b>3.1 Were data for this outcome available for all, or nearly all, participants randomized?</b>               | Ten patients (one man and nine women), with 20 minor aphthous ulcers recruited in the study. But no information whether all data from included participant were available. | <u>Y / PY</u> / <u>PN</u> / <u>N</u> / <b>NI</b>                                               |
| <b>3.2 If <u>N/PN/NI</u> to 3.1: Is there evidence that the result was not biased by missing outcome data?</b> | -                                                                                                                                                                          | NA / <u>Y / PY</u> / <u>PN</u> / <u>N</u>                                                      |
| <b>3.3 If <u>N/PN</u> to 3.2: Could missingness in the outcome depend on its true value?</b>                   | -                                                                                                                                                                          | NA / <u>Y / PY</u> / <u>PN</u> / <u>N</u> / NI                                                 |
| <b>3.4 If <u>Y/PY/NI</u> to 3.3: Is it likely that missingness in the outcome depended on its true value?</b>  | -                                                                                                                                                                          | NA / <u>Y / PY</u> / <u>PN</u> / <u>N</u> / NI                                                 |
| <b>Risk-of-bias judgement</b>                                                                                  |                                                                                                                                                                            | Low / High / <b>Some concerns</b>                                                              |
| Optional: What is the predicted direction of bias due to missing outcome data?                                 |                                                                                                                                                                            | NA / Favours experimental / Favours comparator / Towards null / Away from null / Unpredictable |

Domain 4: Risk of bias in measurement of the outcome

| Signalling questions                                                                                                            | Comments                                                                        | Response options                                                                               |
|---------------------------------------------------------------------------------------------------------------------------------|---------------------------------------------------------------------------------|------------------------------------------------------------------------------------------------|
| 4.1 Was the method of measuring the outcome inappropriate?                                                                      | Probably no because healing time was evaluated per day based on size of lesion. | Y / PY / <b>PN</b> / N / NI                                                                    |
| 4.2 Could measurement or ascertainment of the outcome have differed between intervention groups?                                | No because measurement had been predefined in protocol.                         | Y / PY / <b>PN</b> / N / NI                                                                    |
| 4.3 If <b>N/PN/NI</b> to 4.1 and 4.2: Were outcome assessors aware of the intervention received by study participants?          | No, physician was blinded.                                                      | NA / Y / PY / <b>PN</b> / <b>N</b> / NI                                                        |
| 4.4 If <b>Y/PY/NI</b> to 4.3: Could assessment of the outcome have been influenced by knowledge of intervention received?       | -                                                                               | NA / Y / PY / <b>PN</b> / N / NI                                                               |
| 4.5 If <b>Y/PY/NI</b> to 4.4: Is it likely that assessment of the outcome was influenced by knowledge of intervention received? | -                                                                               | NA / Y / PY / <b>PN</b> / N / NI                                                               |
| Risk-of-bias judgement                                                                                                          |                                                                                 | <b>Low</b> / High / Some concerns                                                              |
| Optional: What is the predicted direction of bias in measurement of the outcome?                                                |                                                                                 | NA / Favours experimental / Favours comparator / Towards null / Away from null / Unpredictable |

Domain 5: Risk of bias in selection of the reported result

| Signalling questions                                                                                                                                                                              | Comments                                                                                                                                                                                                       | Response options                                                                                      |
|---------------------------------------------------------------------------------------------------------------------------------------------------------------------------------------------------|----------------------------------------------------------------------------------------------------------------------------------------------------------------------------------------------------------------|-------------------------------------------------------------------------------------------------------|
| <p><b>5.1 Were the data that produced this result analysed in accordance with a pre-specified analysis plan that was finalized before unblinded outcome data were available for analysis?</b></p> | <p>he results were expressed as mean – standard deviations. Statistical significance was tested using the Student’s t test. The level of statistical significance was set at a two-tailed p-value of 0.05.</p> | <p><input checked="" type="checkbox"/> Y / PY / PN / N / NI</p>                                       |
| <p><b>Is the numerical result being assessed likely to have been selected, on the basis of the results, from...</b></p>                                                                           |                                                                                                                                                                                                                |                                                                                                       |
| <p><b>5.2. ... multiple eligible outcome measurements (e.g. scales, definitions, time points) within the outcome domain?</b></p>                                                                  | <p>No. Only healing time in days</p>                                                                                                                                                                           | <p>Y / PY / PN / <input checked="" type="checkbox"/> NI</p>                                           |
| <p><b>5.3 ... multiple eligible analyses of the data?</b></p>                                                                                                                                     | <p>No. Only comparison of healing time between treatment group.</p>                                                                                                                                            | <p>Y / PY / PN / <input checked="" type="checkbox"/> NI</p>                                           |
| <p><b>Risk-of-bias judgement</b></p>                                                                                                                                                              |                                                                                                                                                                                                                | <p><input checked="" type="checkbox"/> Low / High / Some concerns</p>                                 |
| <p>Optional: What is the predicted direction of bias due to selection of the reported result?</p>                                                                                                 |                                                                                                                                                                                                                | <p>NA / Favours experimental / Favours comparator / Towards null / Away from null / Unpredictable</p> |

Overall risk of bias

|                                                                             |                                                                                                                                           |                                                                                                |
|-----------------------------------------------------------------------------|-------------------------------------------------------------------------------------------------------------------------------------------|------------------------------------------------------------------------------------------------|
| <b>Risk-of-bias judgement</b>                                               | Because allocation of participant and randomization were not informed in the article, so we would decide this article with some concerns. | Low / High / Some concerns                                                                     |
| Optional: What is the overall predicted direction of bias for this outcome? |                                                                                                                                           | NA / Favours experimental / Favours comparator / Towards null / Away from null / Unpredictable |



This work is licensed under a [Creative Commons Attribution-NonCommercial-NoDerivatives 4.0 International License](https://creativecommons.org/licenses/by-nc-nd/4.0/).



# Revised Cochrane risk-of-bias tool for randomized trials (RoB TEMPLATE FOR COMPLETION

Edited by Julian PT Higgins, Jelena Savović, Matthew J Page, Jonathan AC Sterne  
on behalf of the RoB2 Development Group

**Version of 22 August 2019**

Some Concerns

The development of the RoB 2 tool was supported by the MRC Network of Hubs for Trials Methodology Research (MR/L004933/2- N61), with the support of the host MRC ConDuCT-II Hub (Collaboration and innovation for Difficult and Complex randomised controlled Trials In Invasive procedures - MR/K025643/1), by MRC research grant MR/M025209/1, and by a grant from The Cochrane Collaboration.



This work is licensed under a [Creative Commons Attribution-NonCommercial-NoDerivatives 4.0 International License](https://creativecommons.org/licenses/by-nc-nd/4.0/).

## Study details

### Reference

Prasad R. S, Pai A. Assessment of immediate pain relief with laser treatment in recurrent aphthous stomatitis. Oral Surg Oral Med Oral Pathol Oral Radiol [Internet]. 2013;116(2):189–93. Available from: <http://dx.doi.org/10.1016/j.oooo.2013.02.011>

### Study design

- Individually-randomized parallel-group trial
- Cluster-randomized parallel-group trial
- Individually randomized cross-over (or other matched) trial

### For the purposes of this assessment, the interventions being compared are defined as

Experimental:

Co2

Comparator:

Placebo

### Specify which outcome is being assessed for risk of bias

Reduced pain and healing time

**Specify the numerical result being assessed.** In case of multiple alternative analyses being presented, specify the numeric result (e.g. RR = 1.52 (95% CI 0.83 to 2.77) and/or a reference (e.g. to a table, figure or paragraph) that uniquely defines the result being assessed.

Fig. 1. Mean healing time (in days).

Fig. 2. Box plots showing comparison between laser and placebo groups before treatment, immediately after treatment and 24 h after treatment.

### Is the review team's aim for this result...?

- to assess the effect of *assignment to intervention* (the 'intention-to-treat' effect)
- to assess the effect of *adhering to intervention* (the 'per-protocol' effect)

If the aim is to assess the effect of *adhering to intervention*, select the deviations from intended intervention that should be addressed (at least one must be checked):

- occurrence of non-protocol interventions
- failures in implementing the intervention that could have affected the outcome
- non-adherence to their assigned intervention by trial participants

Which of the following sources were obtained to help inform the risk-of-bias assessment? (tick as many as apply)

- Journal article(s) with results of the trial
- Trial protocol
- Statistical analysis plan (SAP)
- Non-commercial trial registry record (e.g. ClinicalTrials.gov record)
- Company-owned trial registry record (e.g. GSK Clinical Study Register record)
- "Grey literature" (e.g. unpublished thesis)
- Conference abstract(s) about the trial
- Regulatory document (e.g. Clinical Study Report, Drug Approval Package)
- Research ethics application
- Grant database summary (e.g. NIH RePORTER or Research Councils UK Gateway to Research)
- Personal communication with trialist
- Personal communication with the sponsor

## Risk of bias assessment

Responses underlined in green are potential markers for low risk of bias, and responses in **red** are potential markers for a risk of bias. Where questions relate only to sign posts to other questions, no formatting is used.

### Domain 1: Risk of bias arising from the randomization process

| Signalling questions                                                                                              | Comments                                                                                                                                                                                                                                                                                                                                                                                      | Response options                                                                               |
|-------------------------------------------------------------------------------------------------------------------|-----------------------------------------------------------------------------------------------------------------------------------------------------------------------------------------------------------------------------------------------------------------------------------------------------------------------------------------------------------------------------------------------|------------------------------------------------------------------------------------------------|
| <b>1.1 Was the allocation sequence random?</b>                                                                    | In each of these patients, 2 ulcers as measured by the investigator, of dimension approximately 1 cm or less were selected in different locations in the oral cavity. One of them was randomly allocated to be treated with CO2 laser (Union Medical Engineering Co., UM-L25 special edition, Korea), and the other served as a placebo.<br><br>Probably yes because there was placebo group. | <u>Y</u> / PY / PN / N / NI                                                                    |
| <b>1.2 Was the allocation sequence concealed until participants were enrolled and assigned to interventions?</b>  |                                                                                                                                                                                                                                                                                                                                                                                               | <u>Y</u> / PY / PN / N / NI                                                                    |
| <b>1.3 Did baseline differences between intervention groups suggest a problem with the randomization process?</b> | The mean pretreatment pain scores in the laser and placebo groups were observed to be 8.48 0.71 and 8.08 0.70 respectively (Table I).                                                                                                                                                                                                                                                         | Y / PY / <u>PN</u> / N / NI                                                                    |
| <b>Risk-of-bias judgement</b>                                                                                     |                                                                                                                                                                                                                                                                                                                                                                                               | <u>Low</u> / High / Some concerns                                                              |
| Optional: What is the predicted direction of bias arising from the randomization process?                         |                                                                                                                                                                                                                                                                                                                                                                                               | NA / Favours experimental / Favours comparator / Towards null / Away from null / Unpredictable |

Domain 2: Risk of bias due to deviations from the intended interventions (*effect of assignment to intervention*)

| Signalling questions                                                                                                                                                          | Comments                                                                                                                                                                                                                                                                                                  | Response options                                                                               |
|-------------------------------------------------------------------------------------------------------------------------------------------------------------------------------|-----------------------------------------------------------------------------------------------------------------------------------------------------------------------------------------------------------------------------------------------------------------------------------------------------------|------------------------------------------------------------------------------------------------|
| 2.1. Were participants aware of their assigned intervention during the trial?                                                                                                 | a single-blind study designed in a manner such that the patients were unaware as to which of the lesions was going to be treated with laser and which one would be selected as a placebo.                                                                                                                 | Y / PY / <u>PN</u> / <u>N</u> / NI                                                             |
| 2.2. Were carers and people delivering the interventions aware of participants' assigned intervention during the trial?                                                       | Yes the investigator was aware of the intervention.                                                                                                                                                                                                                                                       | Y / PY / <u>PN</u> / <u>N</u> / NI                                                             |
| 2.3. If <u>Y/PY/NI</u> to 2.1 or 2.2: Were there deviations from the intended intervention that arose because of the trial context?                                           | No because procedure had been defined, the outcome has been defined presented with total reduction of erythema and absence of ulcer.                                                                                                                                                                      | NA / Y / PY / <u>PN</u> / <u>N</u> / NI                                                        |
| 2.4 If <u>Y/PY</u> to 2.3: Were these deviations likely to have affected the outcome?                                                                                         | -                                                                                                                                                                                                                                                                                                         | NA / Y / PY / <u>PN</u> / <u>N</u> / NI                                                        |
| 2.5. If <u>Y/PY/NI</u> to 2.4: Were these deviations from intended intervention balanced between groups?                                                                      | -                                                                                                                                                                                                                                                                                                         | NA / <u>Y</u> / PY / <u>PN</u> / <u>N</u> / NI                                                 |
| 2.6 Was an appropriate analysis used to estimate the effect of assignment to intervention?                                                                                    | Mann-Whitney test was used to statistically analyze and compare mean pain scores between the 2 groups. Wilcoxon-signed ranks test was used to compare the change in mean pain scores from baseline to other time intervals within each group. A P value of <.05 was considered statistically significant. | <u>Y</u> / PY / <u>PN</u> / <u>N</u> / NI                                                      |
| 2.7 If <u>N/PN/NI</u> to 2.6: Was there potential for a substantial impact (on the result) of the failure to analyse participants in the group to which they were randomized? | -                                                                                                                                                                                                                                                                                                         | NA / Y / PY / <u>PN</u> / <u>N</u> / NI                                                        |
| Risk-of-bias judgement                                                                                                                                                        |                                                                                                                                                                                                                                                                                                           | <u>Low</u> / High / Some concerns                                                              |
| Optional: What is the predicted direction of bias due to deviations from intended interventions?                                                                              |                                                                                                                                                                                                                                                                                                           | NA / Favours experimental / Favours comparator / Towards null / Away from null / Unpredictable |

Domain 2: Risk of bias due to deviations from the intended interventions (*effect of adhering to intervention*)

| Signalling questions                                                                                                                              | Comments | Response options                                                                               |
|---------------------------------------------------------------------------------------------------------------------------------------------------|----------|------------------------------------------------------------------------------------------------|
| 2.1. Were participants aware of their assigned intervention during the trial?                                                                     |          | Y / PY / <u>PN / N</u> / NI                                                                    |
| 2.2. Were carers and people delivering the interventions aware of participants' assigned intervention during the trial?                           |          | Y / PY / <u>PN / N</u> / NI                                                                    |
| 2.3. [If applicable:] <u>If Y/PY/NI to 2.1 or 2.2:</u> Were important non-protocol interventions balanced across intervention groups?             |          | NA / <u>Y / PY</u> / PN / N / NI                                                               |
| 2.4. [If applicable:] Were there failures in implementing the intervention that could have affected the outcome?                                  |          | NA / Y / PY / <u>PN / N</u> / NI                                                               |
| 2.5. [If applicable:] Was there non-adherence to the assigned intervention regimen that could have affected participants' outcomes?               |          | NA / Y / PY / <u>PN / N</u> / NI                                                               |
| 2.6. <u>If N/PN/NI to 2.3, or Y/PY/NI to 2.4 or 2.5:</u> Was an appropriate analysis used to estimate the effect of adhering to the intervention? |          | NA / <u>Y / PY</u> / PN / N / NI                                                               |
| Risk-of-bias judgement                                                                                                                            |          | Low / High / Some concerns                                                                     |
| Optional: What is the predicted direction of bias due to deviations from intended interventions?                                                  |          | NA / Favours experimental / Favours comparator / Towards null / Away from null / Unpredictable |

Domain 3: Missing outcome data

| Signalling questions                                                                                           | Comments                                                                                 | Response options                                                                               |
|----------------------------------------------------------------------------------------------------------------|------------------------------------------------------------------------------------------|------------------------------------------------------------------------------------------------|
| <b>3.1 Were data for this outcome available for all, or nearly all, participants randomized?</b>               | Probably yes because in the result it was mentioned outcome of all included participant. | <u>Y</u> / <u>PY</u> / <u>PN</u> / <u>N</u> / <b>NI</b>                                        |
| <b>3.2 If <u>N/PN/NI</u> to 3.1: Is there evidence that the result was not biased by missing outcome data?</b> | No                                                                                       | NA / <u>Y</u> / <u>PY</u> / <u>PN</u> / <u>N</u>                                               |
| <b>3.3 If <u>N/PN</u> to 3.2: Could missingness in the outcome depend on its true value?</b>                   | Not informed                                                                             | NA / <u>Y</u> / <u>PY</u> / <u>PN</u> / <u>N</u> / NI                                          |
| <b>3.4 If <u>Y/PY/NI</u> to 3.3: Is it likely that missingness in the outcome depended on its true value?</b>  | Not informed                                                                             | NA / <u>Y</u> / <u>PY</u> / <u>PN</u> / <u>N</u> / NI                                          |
| <b>Risk-of-bias judgement</b>                                                                                  | No evidence of no missing outcome                                                        | Low / High / <b>Some concerns</b>                                                              |
| Optional: What is the predicted direction of bias due to missing outcome data?                                 |                                                                                          | NA / Favours experimental / Favours comparator / Towards null / Away from null / Unpredictable |

Domain 4: Risk of bias in measurement of the outcome

| Signalling questions                                                                                                            | Comments                                                                                                                                                                                                                                                                                                                                                                     | Response options                                                                               |
|---------------------------------------------------------------------------------------------------------------------------------|------------------------------------------------------------------------------------------------------------------------------------------------------------------------------------------------------------------------------------------------------------------------------------------------------------------------------------------------------------------------------|------------------------------------------------------------------------------------------------|
| 4.1 Was the method of measuring the outcome inappropriate?                                                                      | The patients were requested to grade the pain of their ulcers on a numerical rating scale of 1-10, [score '0' indicated no pain and score '10' indicated maximum pain] before and immediately after the procedure. The patients were evaluated every 2 days for the next weeks. Total reduction of erythema and the absence of an ulcer clinically was considered as healed. | Y / PY / <u>PN</u> / <u>N</u> / NI                                                             |
| 4.2 Could measurement or ascertainment of the outcome have differed between intervention groups?                                | No because one investigator was assigned and measurement method had been defined.                                                                                                                                                                                                                                                                                            | Y / PY / <u>PN</u> / <u>N</u> / NI                                                             |
| 4.3 If <u>N/PN/NI</u> to 4.1 and 4.2: Were outcome assessors aware of the intervention received by study participants?          | Investigator was aware of the intervention for healing time. and for pain was assessed by participants who were not aware of the invention.                                                                                                                                                                                                                                  | NA / Y / PY / <u>PN</u> / <u>N</u> / NI                                                        |
| 4.4 If <u>Y/PY/NI</u> to 4.3: Could assessment of the outcome have been influenced by knowledge of intervention received?       | No because the assessment based on clinical manifestation.                                                                                                                                                                                                                                                                                                                   | NA / Y / PY / <u>PN</u> / <u>N</u> / NI                                                        |
| 4.5 If <u>Y/PY/NI</u> to 4.4: Is it likely that assessment of the outcome was influenced by knowledge of intervention received? | -                                                                                                                                                                                                                                                                                                                                                                            | NA / Y / PY / <u>PN</u> / <u>N</u> / NI                                                        |
| Risk-of-bias judgement                                                                                                          | Very unlikely to biased.                                                                                                                                                                                                                                                                                                                                                     | <u>Low</u> / High / Some concerns                                                              |
| Optional: What is the predicted direction of bias in measurement of the outcome?                                                |                                                                                                                                                                                                                                                                                                                                                                              | NA / Favours experimental / Favours comparator / Towards null / Away from null / Unpredictable |



Domain 5: Risk of bias in selection of the reported result

| Signalling questions                                                                                                                                                                              | Comments                                                                                                                                                                                                                                             | Response options                                                                                      |
|---------------------------------------------------------------------------------------------------------------------------------------------------------------------------------------------------|------------------------------------------------------------------------------------------------------------------------------------------------------------------------------------------------------------------------------------------------------|-------------------------------------------------------------------------------------------------------|
| <p><b>5.1 Were the data that produced this result analysed in accordance with a pre-specified analysis plan that was finalized before unblinded outcome data were available for analysis?</b></p> | <p>ManneWhitney test was used to statistically analyze and compare mean pain scores between the 2 groups. Wilcoxon-signed ranks test was used to compare the change in mean pain scores from baseline to other time intervals within each group.</p> | <p>Y / <b>PY</b> / PN / N / NI</p>                                                                    |
| <p><b>Is the numerical result being assessed likely to have been selected, on the basis of the results, from...</b></p>                                                                           |                                                                                                                                                                                                                                                      |                                                                                                       |
| <p><b>5.2. ... multiple eligible outcome measurements (e.g. scales, definitions, time points) within the outcome domain?</b></p>                                                                  | <p>No because pain score only using numerical scale and healing time using clinical assessment per 2 days.</p>                                                                                                                                       | <p>Y / PY / <b>PN</b> / N / <b>NI</b></p>                                                             |
| <p><b>5.3 ... multiple eligible analyses of the data?</b></p>                                                                                                                                     | <p>No because pain score was compare between group and healing time was only compared between group.</p>                                                                                                                                             | <p>Y / PY / <b>PN</b> / N / NI</p>                                                                    |
| <p><b>Risk-of-bias judgement</b></p>                                                                                                                                                              |                                                                                                                                                                                                                                                      | <p>Low / High / <b>Some concerns</b></p>                                                              |
| <p>Optional: What is the predicted direction of bias due to selection of the reported result?</p>                                                                                                 |                                                                                                                                                                                                                                                      | <p>NA / Favours experimental / Favours comparator / Towards null / Away from null / Unpredictable</p> |

Overall risk of bias

|                                                                             |  |                                                                                                |
|-----------------------------------------------------------------------------|--|------------------------------------------------------------------------------------------------|
| <b>Risk-of-bias judgement</b>                                               |  | Low / High / <u>Some concerns</u>                                                              |
| Optional: What is the overall predicted direction of bias for this outcome? |  | NA / Favours experimental / Favours comparator / Towards null / Away from null / Unpredictable |

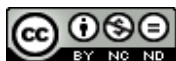

This work is licensed under a [Creative Commons Attribution-NonCommercial-NoDerivatives 4.0 International License](https://creativecommons.org/licenses/by-nc-nd/4.0/).

# Revised Cochrane risk-of-bias tool for randomized trials (RoB2) TEMPLATE FOR COMPLETION

Edited by Julian PT Higgins, Jelena Savović, Matthew J Page, Jonathan AC Sterne  
on behalf of the RoB2 Development Group

**Version of 22 August 2019**

**Low Risk**

The development of the RoB 2 tool was supported by the MRC Network of Hubs for Trials Methodology Research (MR/L004933/2- N61), with the support of the host MRC ConDuCT-II Hub (Collaboration and innovation for Difficult and Complex randomised controlled Trials In Invasive procedures - MR/K025643/1), by MRC research grant MR/M025209/1, and by a grant from The Cochrane Collaboration.



This work is licensed under a [Creative Commons Attribution-NonCommercial-NoDerivatives 4.0 International License](https://creativecommons.org/licenses/by-nc-nd/4.0/).

## Study details

### Reference

Albrektson M, Hedström L, Bergh H. Recurrent aphthous stomatitis and pain management with low-level laser therapy: A randomized controlled trial. *Oral Surg Oral Med Oral Pathol Oral Radiol* [Internet]. 2014;117(5):590–4. Available from: <http://dx.doi.org/10.1016/j.oooo.2014.01.228>

### Study design

- Individually-randomized parallel-group trial
- Cluster-randomized parallel-group trial
- Individually randomized cross-over (or other matched) trial

### For the purposes of this assessment, the interventions being compared are defined as

Experimental:

GaAIAs

Comparator:

Placebo

### Specify which outcome is being assessed for risk of bias

Reduced pain

**Specify the numerical result being assessed.** In case of multiple alternative analyses being presented, specify the numeric result (e.g. RR = 1.52 (95% CI 0.83 to 2.77) and/or a reference (e.g. to a table, figure or paragraph) that uniquely defines the result being assessed.

Fig. 1. The laser group's and placebo group's mean value and error bars of visual analog scale (VAS) rating of aphthous stomatitis pain before treatment with low-level laser therapy (day 0), 1 day after the first treatment (day 1), and 1 day after the second treatment (day 2).

### Is the review team's aim for this result...?

- to assess the effect of *assignment to intervention* (the 'intention-to-treat' effect)
- to assess the effect of *adhering to intervention* (the 'per-protocol' effect)

**If the aim is to assess the effect of *adhering to intervention*, select the deviations from intended intervention that should be addressed (at least one must be checked):**

- occurrence of non-protocol interventions
- failures in implementing the intervention that could have affected the outcome
- non-adherence to their assigned intervention by trial participants

**Which of the following sources were obtained to help inform the risk-of-bias assessment? (tick as many as apply)**

- Journal article(s) with results of the trial
- Trial protocol
- Statistical analysis plan (SAP)
- Non-commercial trial registry record (e.g. ClinicalTrials.gov record)
- Company-owned trial registry record (e.g. GSK Clinical Study Register record)
- "Grey literature" (e.g. unpublished thesis)
- Conference abstract(s) about the trial
- Regulatory document (e.g. Clinical Study Report, Drug Approval Package)
- Research ethics application
- Grant database summary (e.g. NIH RePORTER or Research Councils UK Gateway to Research)
- Personal communication with trialist
- Personal communication with the sponsor

## Risk of bias assessment

Responses underlined in green are potential markers for low risk of bias, and responses in **red** are potential markers for a risk of bias. Where questions relate only to sign posts to other questions, no formatting is used.

### Domain 1: Risk of bias arising from the randomization process

| Signalling questions                                                                                              | Comments                                                                                                                                                                     | Response options                                                                               |
|-------------------------------------------------------------------------------------------------------------------|------------------------------------------------------------------------------------------------------------------------------------------------------------------------------|------------------------------------------------------------------------------------------------|
| <b>1.1 Was the allocation sequence random?</b>                                                                    | Patients who agreed to take part in the study were randomly allocated by tossing a coin, done by another person than the operator, to either the treatment or placebo group. | <u>Y</u> / PY / PN / N / NI                                                                    |
| <b>1.2 Was the allocation sequence concealed until participants were enrolled and assigned to interventions?</b>  | Probably yes because patient in placebo control was not aware of the procedure.                                                                                              | <u>Y</u> / <u>PY</u> / PN / N / NI                                                             |
| <b>1.3 Did baseline differences between intervention groups suggest a problem with the randomization process?</b> | The placebo group in terms of age (median), sex distribution, and duration of the ulcer treated were not significantly different from the treatment group.                   | Y / PY / <u>PN</u> / N / NI                                                                    |
| <b>Risk-of-bias judgement</b>                                                                                     |                                                                                                                                                                              | <u>Low</u> High / Some concerns                                                                |
| Optional: What is the predicted direction of bias arising from the randomization process?                         |                                                                                                                                                                              | NA / Favours experimental / Favours comparator / Towards null / Away from null / Unpredictable |

Domain 2: Risk of bias due to deviations from the intended interventions (*effect of assignment to intervention*)

| Signalling questions                                                                                                                                                           | Comments                                                                                                         | Response options                                                                                  |
|--------------------------------------------------------------------------------------------------------------------------------------------------------------------------------|------------------------------------------------------------------------------------------------------------------|---------------------------------------------------------------------------------------------------|
| 2.1. Were participants aware of their assigned intervention during the trial?                                                                                                  | No. The same procedure took place in placebo group but without any power, about which the patient was not aware. | Y / PY / <input checked="" type="checkbox"/> PN / N / NI                                          |
| 2.2. Were carers and people delivering the interventions aware of participants' assigned intervention during the trial?                                                        | Yes. All treatment was carried out by one of the authors (M.A.), who was not blinded to the procedure.           | <input checked="" type="checkbox"/> Y / PY / <input checked="" type="checkbox"/> PN / N / NI      |
| 2.3. If <b>Y/PY/NI</b> to 2.1 or 2.2: Were there deviations from the intended intervention that arose because of the trial context?                                            | No because intervention protocol had been defined.                                                               | NA / Y / PY / <input checked="" type="checkbox"/> PN / <input checked="" type="checkbox"/> N / NI |
| 2.4. If <b>Y/PY</b> to 2.3: Were these deviations likely to have affected the outcome?                                                                                         | -                                                                                                                | NA / Y / PY / <input checked="" type="checkbox"/> PN / N / NI                                     |
| 2.5. If <b>Y/PY/NI</b> to 2.4: Were these deviations from intended intervention balanced between groups?                                                                       | -                                                                                                                | NA / <input checked="" type="checkbox"/> Y / PY / <input checked="" type="checkbox"/> PN / N / NI |
| 2.6. Was an appropriate analysis used to estimate the effect of assignment to intervention?                                                                                    | Statistical analysis was conducted by means of the nonparametric Mann-Whitney U test,                            | <input checked="" type="checkbox"/> Y / PY / <input checked="" type="checkbox"/> PN / N / NI      |
| 2.7. If <b>N/PN/NI</b> to 2.6: Was there potential for a substantial impact (on the result) of the failure to analyse participants in the group to which they were randomized? |                                                                                                                  | NA / Y / PY / <input checked="" type="checkbox"/> PN / N / NI                                     |
| Risk-of-bias judgement                                                                                                                                                         |                                                                                                                  | <input checked="" type="checkbox"/> Low / High / Some concerns                                    |
| Optional: What is the predicted direction of bias due to deviations from intended interventions?                                                                               |                                                                                                                  | NA / Favours experimental / Favours comparator / Towards null / Away from null / Unpredictable    |

Domain 2: Risk of bias due to deviations from the intended interventions (*effect of adhering to intervention*)

| Signalling questions                                                                                                                              | Comments | Response options                                                                               |
|---------------------------------------------------------------------------------------------------------------------------------------------------|----------|------------------------------------------------------------------------------------------------|
| 2.1. Were participants aware of their assigned intervention during the trial?                                                                     |          | Y / PY / <u>PN / N</u> / NI                                                                    |
| 2.2. Were carers and people delivering the interventions aware of participants' assigned intervention during the trial?                           |          | Y / PY / <u>PN / N</u> / NI                                                                    |
| 2.3. [If applicable:] <u>If Y/PY/NI to 2.1 or 2.2:</u> Were important non-protocol interventions balanced across intervention groups?             |          | NA / <u>Y / PY</u> / PN / N / NI                                                               |
| 2.4. [If applicable:] Were there failures in implementing the intervention that could have affected the outcome?                                  |          | NA / Y / PY / <u>PN / N</u> / NI                                                               |
| 2.5. [If applicable:] Was there non-adherence to the assigned intervention regimen that could have affected participants' outcomes?               |          | NA / Y / PY / <u>PN / N</u> / NI                                                               |
| 2.6. <u>If N/PN/NI to 2.3, or Y/PY/NI to 2.4 or 2.5:</u> Was an appropriate analysis used to estimate the effect of adhering to the intervention? |          | NA / <u>Y / PY</u> / PN / N / NI                                                               |
| Risk-of-bias judgement                                                                                                                            |          | Low / High / Some concerns                                                                     |
| Optional: What is the predicted direction of bias due to deviations from intended interventions?                                                  |          | NA / Favours experimental / Favours comparator / Towards null / Away from null / Unpredictable |



Domain 3: Missing outcome data

| Signalling questions                                                                                           | Comments                                                                            | Response options                                                                               |
|----------------------------------------------------------------------------------------------------------------|-------------------------------------------------------------------------------------|------------------------------------------------------------------------------------------------|
| <b>3.1 Were data for this outcome available for all, or nearly all, participants randomized?</b>               | Twenty patients in each group completed the study, with no reported adverse events. | Y / <b>PN</b> / N / NI                                                                         |
| <b>3.2 If <u>N/PN/NI</u> to 3.1: Is there evidence that the result was not biased by missing outcome data?</b> | -                                                                                   | NA / Y / PY / PN / N                                                                           |
| <b>3.3 If <u>N/PN</u> to 3.2: Could missingness in the outcome depend on its true value?</b>                   | -                                                                                   | NA / Y / PY / <u>PN / N</u> / NI                                                               |
| <b>3.4 If <u>Y/PY/NI</u> to 3.3: Is it likely that missingness in the outcome depended on its true value?</b>  | -                                                                                   | NA / Y / PY / <u>PN / N</u> / NI                                                               |
| <b>Risk-of-bias judgement</b>                                                                                  |                                                                                     | <b>Low</b> / High / Some concerns                                                              |
| Optional: What is the predicted direction of bias due to missing outcome data?                                 |                                                                                     | NA / Favours experimental / Favours comparator / Towards null / Away from null / Unpredictable |

Domain 4: Risk of bias in measurement of the outcome

| Signalling questions                                                                                                            | Comments                                                                                  | Response options                                                                               |
|---------------------------------------------------------------------------------------------------------------------------------|-------------------------------------------------------------------------------------------|------------------------------------------------------------------------------------------------|
| 4.1 Was the method of measuring the outcome inappropriate?                                                                      | Pain using VAS is a validated scale                                                       | Y / PY / <u>PN</u> / NI                                                                        |
| 4.2 Could measurement or ascertainment of the outcome have differed between intervention groups?                                | No, all intervention groups used the same measurement.                                    | Y / PY / <u>PN</u> / NI                                                                        |
| 4.3 If <u>N/PN/NI</u> to 4.1 and 4.2: Were outcome assessors aware of the intervention received by study participants?          | No the assessor was the patient who was blinded to which intervention they were assigned. | NA / Y / PY / <u>PN</u> / NI                                                                   |
| 4.4 If <u>Y/PY/NI</u> to 4.3: Could assessment of the outcome have been influenced by knowledge of intervention received?       | -                                                                                         | NA / Y / PY / <u>PN</u> / NI                                                                   |
| 4.5 If <u>Y/PY/NI</u> to 4.4: Is it likely that assessment of the outcome was influenced by knowledge of intervention received? | -                                                                                         | NA / Y / PY / <u>PN</u> / NI                                                                   |
| Risk-of-bias judgement                                                                                                          |                                                                                           | <u>Low</u> / High / Some concerns                                                              |
| Optional: What is the predicted direction of bias in measurement of the outcome?                                                |                                                                                           | NA / Favours experimental / Favours comparator / Towards null / Away from null / Unpredictable |

Domain 5: Risk of bias in selection of the reported result

| Signalling questions                                                                                                                                                                              | Comments                                                                                                                                                   | Response options                                                                                      |
|---------------------------------------------------------------------------------------------------------------------------------------------------------------------------------------------------|------------------------------------------------------------------------------------------------------------------------------------------------------------|-------------------------------------------------------------------------------------------------------|
| <p><b>5.1 Were the data that produced this result analysed in accordance with a pre-specified analysis plan that was finalized before unblinded outcome data were available for analysis?</b></p> | <p>the nonparametric Mann-Whitney U test, in which the study groups were compared in terms of age, sex, and number of days with the ulcer in question.</p> | <p>Y / PY / PN / N / NI</p>                                                                           |
| <p><b>Is the numerical result being assessed likely to have been selected, on the basis of the results, from...</b></p>                                                                           |                                                                                                                                                            |                                                                                                       |
| <p><b>5.2. ... multiple eligible outcome measurements (e.g. scales, definitions, time points) within the outcome domain?</b></p>                                                                  | <p>No, only using VAS score for pain intensity.</p>                                                                                                        | <p>Y / PY / PN / N / NI</p>                                                                           |
| <p><b>5.3 ... multiple eligible analyses of the data?</b></p>                                                                                                                                     | <p>No only comparison between day not between group.</p>                                                                                                   | <p>Y / PY / PN / N / NI</p>                                                                           |
| <p><b>Risk-of-bias judgement</b></p>                                                                                                                                                              |                                                                                                                                                            | <p>Low / High / Some concerns</p>                                                                     |
| <p>Optional: What is the predicted direction of bias due to selection of the reported result?</p>                                                                                                 |                                                                                                                                                            | <p>NA / Favours experimental / Favours comparator / Towards null / Away from null / Unpredictable</p> |

Overall risk of bias

|                                                                             |  |                                                                                                |
|-----------------------------------------------------------------------------|--|------------------------------------------------------------------------------------------------|
| <b>Risk-of-bias judgement</b>                                               |  | Low / High / Some concerns                                                                     |
| Optional: What is the overall predicted direction of bias for this outcome? |  | NA / Favours experimental / Favours comparator / Towards null / Away from null / Unpredictable |

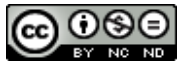

This work is licensed under a [Creative Commons Attribution-NonCommercial-NoDerivatives 4.0 International License](https://creativecommons.org/licenses/by-nc-nd/4.0/).

# Revised Cochrane risk-of-bias tool for randomized trials (RoB 2) TEMPLATE FOR COMPLETION

Edited by Julian PT Higgins, Jelena Savović, Matthew J Page, Jonathan AC Sterne  
on behalf of the RoB2 Development Group

**Version of 22 August 2019**

**High Risk**

The development of the RoB 2 tool was supported by the MRC Network of Hubs for Trials Methodology Research (MR/L004933/2- N61), with the support of the host MRC ConDuCT-II Hub (Collaboration and innovation for Difficult and Complex randomised controlled Trials In Invasive procedures - MR/K025643/1), by MRC research grant MR/M025209/1, and by a grant from The Cochrane Collaboration.



This work is licensed under a [Creative Commons Attribution-NonCommercial-NoDerivatives 4.0 International License](https://creativecommons.org/licenses/by-nc-nd/4.0/).

## Study details

### Reference

Lalabonova H, Daskalov H. Clinical assessment of the therapeutic effect of low-level laser therapy on chronic recurrent aphthous stomatitis. *Biotechnol Biotechnol Equip* [Internet]. 2014;28(5):929–33. Available from: <http://dx.doi.org/10.1080/13102818.2014.966526>

### Study design

- Individually-randomized parallel-group trial
- Cluster-randomized parallel-group trial
- Individually randomized cross-over (or other matched) trial

### For the purposes of this assessment, the interventions being compared are defined as

Experimental:

Nd:YAG

Comparator:

Granofurin Solcoseryl

### Specify which outcome is being assessed for risk of bias

Reduced pain

**Specify the numerical result being assessed.** In case of multiple alternative analyses being presented, specify the numeric result (e.g. RR = 1.52 (95% CI 0.83 to 2.77) and/or a reference (e.g. to a table, figure or paragraph) that uniquely defines the result being assessed.

Figure 1. Results for the indicator 'pain' for group 1 (LLLT).

Figure 2. Results for the indicator 'pain' for group 2 (conventional pharmacotherapy).

Figure 5. Results for the indicator 'epithelization' for group 1 (LLLT).

Figure 6. Results for the indicator 'epithelization' for group 2 (conventional pharmacotherapy).

### Is the review team's aim for this result...?

- to assess the effect of *assignment to intervention* (the 'intention-to-treat' effect)
- to assess the effect of *adhering to intervention* (the 'per-protocol' effect)

**If the aim is to assess the effect of *adhering to intervention*, select the deviations from intended intervention that should be addressed (at least one must be checked):**

- occurrence of non-protocol interventions
- failures in implementing the intervention that could have affected the outcome
- non-adherence to their assigned intervention by trial participants

**Which of the following sources were obtained to help inform the risk-of-bias assessment? (tick as many as apply)**

- Journal article(s) with results of the trial
- Trial protocol
- Statistical analysis plan (SAP)
- Non-commercial trial registry record (e.g. ClinicalTrials.gov record)
- Company-owned trial registry record (e.g. GSK Clinical Study Register record)
- "Grey literature" (e.g. unpublished thesis)
- Conference abstract(s) about the trial
- Regulatory document (e.g. Clinical Study Report, Drug Approval Package)
- Research ethics application
- Grant database summary (e.g. NIH RePORTER or Research Councils UK Gateway to Research)
- Personal communication with trialist
- Personal communication with the sponsor

## Risk of bias assessment

Responses underlined in green are potential markers for low risk of bias, and responses in **red** are potential markers for a risk of bias. Where questions relate only to sign posts to other questions, no formatting is used.

### Domain 1: Risk of bias arising from the randomization process

| Signalling questions                                                                                       | Comments                                                                                                                                            | Response options                                                                               |
|------------------------------------------------------------------------------------------------------------|-----------------------------------------------------------------------------------------------------------------------------------------------------|------------------------------------------------------------------------------------------------|
| 1.1 Was the allocation sequence random?                                                                    | The patients were randomly divided into two groups at the beginning of the study.                                                                   | <u>Y</u> / PY / PN / N / NI                                                                    |
| 1.2 Was the allocation sequence concealed until participants were enrolled and assigned to interventions?  | Not informed.                                                                                                                                       | <u>Y</u> / PY / PN / N / <u>NI</u>                                                             |
| 1.3 Did baseline differences between intervention groups suggest a problem with the randomization process? | There were no significant correlations between patients' sex and age and the studied parameters for all patients and within each group we compared. | Y / PY / <u>PN</u> / <u>N</u> / NI                                                             |
| Risk-of-bias judgement                                                                                     | No information whether the participant aware to which group of intervention they were assigned to.                                                  | Low / High / <u>Some concerns</u>                                                              |
| Optional: What is the predicted direction of bias arising from the randomization process?                  |                                                                                                                                                     | NA / Favours experimental / Favours comparator / Towards null / Away from null / Unpredictable |



Domain 2: Risk of bias due to deviations from the intended interventions (*effect of assignment to intervention*)

| Signalling questions                                                                                                                                                           | Comments                                                                                                                       | Response options                                                                               |
|--------------------------------------------------------------------------------------------------------------------------------------------------------------------------------|--------------------------------------------------------------------------------------------------------------------------------|------------------------------------------------------------------------------------------------|
| 2.1. Were participants aware of their assigned intervention during the trial?                                                                                                  | Not informed                                                                                                                   | Y / PY / <u>PN</u> / N / <u>NI</u>                                                             |
| 2.2. Were carers and people delivering the interventions aware of participants' assigned intervention during the trial?                                                        | Not informed                                                                                                                   | Y / PY / <u>PN</u> / N / <u>NI</u>                                                             |
| 2.3. If <u>Y/PY/NI</u> to 2.1 or 2.2: Were there deviations from the intended intervention that arose because of the trial context?                                            | No because intervention was performed based on protocol.                                                                       | <u>NA</u> / Y / PY / <u>PN</u> / N / NI                                                        |
| 2.4. If <u>Y/PY</u> to 2.3: Were these deviations likely to have affected the outcome?                                                                                         | -                                                                                                                              | NA / Y / PY / <u>PN</u> / N / NI                                                               |
| 2.5. If <u>Y/PY/NI</u> to 2.4: Were these deviations from intended intervention balanced between groups?                                                                       | -                                                                                                                              | NA / <u>Y</u> / PY / PN / N / NI                                                               |
| 2.6. Was an appropriate analysis used to estimate the effect of assignment to intervention?                                                                                    | Probably yes, the group a patient belonged to had a strong inverse correlation with the study variables after treatment began. | <u>Y</u> / <u>PN</u> / N / NI                                                                  |
| 2.7. If <u>N/PN/NI</u> to 2.6: Was there potential for a substantial impact (on the result) of the failure to analyse participants in the group to which they were randomized? | -                                                                                                                              | NA / Y / PY / <u>PN</u> / N / NI                                                               |
| <b>Risk-of-bias judgement</b>                                                                                                                                                  |                                                                                                                                | Low / High / <u>Some concerns</u>                                                              |
| Optional: What is the predicted direction of bias due to deviations from intended interventions?                                                                               |                                                                                                                                | NA / Favours experimental / Favours comparator / Towards null / Away from null / Unpredictable |

Domain 2: Risk of bias due to deviations from the intended interventions (*effect of adhering to intervention*)

| Signalling questions                                                                                                                              | Comments | Response options                                                                               |
|---------------------------------------------------------------------------------------------------------------------------------------------------|----------|------------------------------------------------------------------------------------------------|
| 2.1. Were participants aware of their assigned intervention during the trial?                                                                     |          | Y / PY / <u>PN / N</u> / NI                                                                    |
| 2.2. Were carers and people delivering the interventions aware of participants' assigned intervention during the trial?                           |          | Y / PY / <u>PN / N</u> / NI                                                                    |
| 2.3. [If applicable:] <u>If Y/PY/NI to 2.1 or 2.2:</u> Were important non-protocol interventions balanced across intervention groups?             |          | NA / <u>Y / PY</u> / PN / N / NI                                                               |
| 2.4. [If applicable:] Were there failures in implementing the intervention that could have affected the outcome?                                  |          | NA / Y / PY / <u>PN / N</u> / NI                                                               |
| 2.5. [If applicable:] Was there non-adherence to the assigned intervention regimen that could have affected participants' outcomes?               |          | NA / Y / PY / <u>PN / N</u> / NI                                                               |
| 2.6. <u>If N/PN/NI to 2.3, or Y/PY/NI to 2.4 or 2.5:</u> Was an appropriate analysis used to estimate the effect of adhering to the intervention? |          | NA / <u>Y / PY</u> / PN / N / NI                                                               |
| Risk-of-bias judgement                                                                                                                            |          | Low / High / Some concerns                                                                     |
| Optional: What is the predicted direction of bias due to deviations from intended interventions?                                                  |          | NA / Favours experimental / Favours comparator / Towards null / Away from null / Unpredictable |

Domain 3: Missing outcome data

| Signalling questions                                                                                           | Comments                                                                                                                                              | Response options                                                                               |
|----------------------------------------------------------------------------------------------------------------|-------------------------------------------------------------------------------------------------------------------------------------------------------|------------------------------------------------------------------------------------------------|
| <b>3.1 Were data for this outcome available for all, or nearly all, participants randomized?</b>               | The study included 180 patients with chronic RAS whom we treated between 2007 and 2012. And all patient outcome presented in the statistical analysis | <input checked="" type="checkbox"/> <u>PY</u> / <u>PN</u> / N / NI                             |
| <b>3.2 If <u>N/PN/NI</u> to 3.1: Is there evidence that the result was not biased by missing outcome data?</b> | -                                                                                                                                                     | NA / <u>Y</u> / <u>PY</u> / <u>PN</u> / N                                                      |
| <b>3.3 If <u>N/PN</u> to 3.2: Could missingness in the outcome depend on its true value?</b>                   | -                                                                                                                                                     | NA / <u>Y</u> / <u>PY</u> / <u>PN</u> / <u>N</u> / NI                                          |
| <b>3.4 If <u>Y/PY/NI</u> to 3.3: Is it likely that missingness in the outcome depended on its true value?</b>  | -                                                                                                                                                     | NA / <u>Y</u> / <u>PY</u> / <u>PN</u> / <u>N</u> / NI                                          |
| <b>Risk-of-bias judgement</b>                                                                                  |                                                                                                                                                       | <input checked="" type="checkbox"/> Low / High / Some concerns                                 |
| Optional: What is the predicted direction of bias due to missing outcome data?                                 |                                                                                                                                                       | NA / Favours experimental / Favours comparator / Towards null / Away from null / Unpredictable |

Domain 4: Risk of bias in measurement of the outcome

| Signalling questions                                                                                                                   | Comments                                                                                                                                                                                                                                                                                                                                                 | Response options                                                                               |
|----------------------------------------------------------------------------------------------------------------------------------------|----------------------------------------------------------------------------------------------------------------------------------------------------------------------------------------------------------------------------------------------------------------------------------------------------------------------------------------------------------|------------------------------------------------------------------------------------------------|
| <b>4.1 Was the method of measuring the outcome inappropriate?</b>                                                                      | Pain: A 10-point visual analogue scale was used to measure pain dynamics, 0 points were scored for no pain; 1 to 5 points, for mild pain and 6 to 10 points, for severe pain.<br>Erythema: The presence, reduction and absence of erythema were recorded.<br>Epithelization: The assessment included absence, beginning and completion of epithelization | Y / PY / <u>PN</u> / <u>N</u> / NI                                                             |
| <b>4.2 Could measurement or ascertainment of the outcome have differed between intervention groups?</b>                                | No because same parameter was used                                                                                                                                                                                                                                                                                                                       | Y / PY / <u>PN</u> / <u>N</u> / NI                                                             |
| <b>4.3 If <u>N/PN/NI</u> to 4.1 and 4.2: Were outcome assessors aware of the intervention received by study participants?</b>          | Not informed.                                                                                                                                                                                                                                                                                                                                            | NA / Y / PY / <u>PN</u> / <u>N</u> / <u>NI</u>                                                 |
| <b>4.4 If <u>Y/PY/NI</u> to 4.3: Could assessment of the outcome have been influenced by knowledge of intervention received?</b>       | No because for pain was assessed by the patient, while erythema and epithelization was assessed clinically.                                                                                                                                                                                                                                              | NA / Y / PY / <u>PN</u> / <u>N</u> / NI                                                        |
| <b>4.5 If <u>Y/PY/NI</u> to 4.4: Is it likely that assessment of the outcome was influenced by knowledge of intervention received?</b> | -                                                                                                                                                                                                                                                                                                                                                        | NA / Y / PY / <u>PN</u> / <u>N</u> / NI                                                        |
| <b>Risk-of-bias judgement</b>                                                                                                          |                                                                                                                                                                                                                                                                                                                                                          | Low / High / <u>Some concerns</u>                                                              |
| Optional: What is the predicted direction of bias in measurement of the outcome?                                                       |                                                                                                                                                                                                                                                                                                                                                          | NA / Favours experimental / Favours comparator / Towards null / Away from null / Unpredictable |

Domain 5: Risk of bias in selection of the reported result

| Signalling questions                                                                                                                                                                       | Comments                                                                                                         | Response options                                                                               |
|--------------------------------------------------------------------------------------------------------------------------------------------------------------------------------------------|------------------------------------------------------------------------------------------------------------------|------------------------------------------------------------------------------------------------|
| <b>5.1 Were the data that produced this result analysed in accordance with a pre-specified analysis plan that was finalized before unblinded outcome data were available for analysis?</b> | The group a patient belonged to had a strong inverse correlation with the study variables after treatment began. | Y / PY / PN / N / <b>NI</b>                                                                    |
| <b>Is the numerical result being assessed likely to have been selected, on the basis of the results, from...</b>                                                                           |                                                                                                                  |                                                                                                |
| <b>5.2. ... multiple eligible outcome measurements (e.g. scales, definitions, time points) within the outcome domain?</b>                                                                  | No, only VAS, erythema clinically and apithelization clinically.                                                 | Y / PY / PN / <b>NI</b> / NI                                                                   |
| <b>5.3 ... multiple eligible analyses of the data?</b>                                                                                                                                     | Reduced pain score compared to number of sample, not by mean value of the pain score.                            | Y / <b>PY</b> / PN / N / NI                                                                    |
| <b>Risk-of-bias judgement</b>                                                                                                                                                              |                                                                                                                  | Low / <b>High</b> / Some concerns                                                              |
| Optional: What is the predicted direction of bias due to selection of the reported result?                                                                                                 |                                                                                                                  | NA / Favours experimental / Favours comparator / Towards null / Away from null / Unpredictable |

Overall risk of bias

|                                                                             |  |                                                                                                |
|-----------------------------------------------------------------------------|--|------------------------------------------------------------------------------------------------|
| <b>Risk-of-bias judgement</b>                                               |  | Low <b>High</b> / Some concerns                                                                |
| Optional: What is the overall predicted direction of bias for this outcome? |  | NA / Favours experimental / Favours comparator / Towards null / Away from null / Unpredictable |

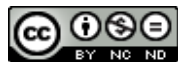

This work is licensed under a [Creative Commons Attribution-NonCommercial-NoDerivatives 4.0 International License](https://creativecommons.org/licenses/by-nc-nd/4.0/).

# Revised Cochrane risk-of-bias tool for randomized trials (RoB TEMPLATE FOR COMPLETION

Edited by Julian PT Higgins, Jelena Savović, Matthew J Page, Jonathan AC Sterne  
on behalf of the RoB2 Development Group

**Version of 22 August 2019**

Some Concerns

The development of the RoB 2 tool was supported by the MRC Network of Hubs for Trials Methodology Research (MR/L004933/2- N61), with the support of the host MRC ConDuCT-II Hub (Collaboration and innovation for Difficult and Complex randomised controlled Trials In Invasive procedures - MR/K025643/1), by MRC research grant MR/M025209/1, and by a grant from The Cochrane Collaboration.



This work is licensed under a [Creative Commons Attribution-NonCommercial-NoDerivatives 4.0 International License](https://creativecommons.org/licenses/by-nc-nd/4.0/).

## Study details

### Reference

Rezvaninezhad RS, Navabi N, Atai Z, Shahravan A. The effect Co2 laser on reducing pain associated with aphthous stomatitis. J Babol Univ Med Sci. 2016;18(10):20–5.

### Study design

- Individually-randomized parallel-group trial
- Cluster-randomized parallel-group trial
- Individually randomized cross-over (or other matched) trial

### For the purposes of this assessment, the interventions being compared are defined as

Experimental:

InGaAIP

Comparator:

Placebo

### Specify which outcome is being assessed for risk of bias

Reduced pain

**Specify the numerical result being assessed.** In case of multiple alternative analyses being presented, specify the numeric result (e.g. RR = 1.52 (95% CI 0.83 to 2.77) and/or a reference (e.g. to a table, figure or paragraph) that uniquely defines the result being assessed.

Reduction of pain in patients of three groups during four time periods showed that the mean VAS from  $5.94 \pm 2.41$  before the intervention decreased to the  $0.39 \pm 1.28$  on the seventh day and there was a significant relationship among the three groups of patients (Fig 2). In other words, pain reduction in CO2 laser treatment group was more compared to the placebo laser treatment group ( $p=0.001$ )

### Is the review team's aim for this result...?

- to assess the effect of *assignment to intervention* (the 'intention-to-treat' effect)
- to assess the effect of *adhering to intervention* (the 'per-protocol' effect)



If the aim is to assess the effect of *adhering to intervention*, select the deviations from intended intervention that should be addressed (at least one must be checked):

- occurrence of non-protocol interventions
- failures in implementing the intervention that could have affected the outcome
- non-adherence to their assigned intervention by trial participants

Which of the following sources were obtained to help inform the risk-of-bias assessment? (tick as many as apply)

- Journal article(s) with results of the trial
- Trial protocol
- Statistical analysis plan (SAP)
- Non-commercial trial registry record (e.g. ClinicalTrials.gov record)
- Company-owned trial registry record (e.g. GSK Clinical Study Register record)
- "Grey literature" (e.g. unpublished thesis)
- Conference abstract(s) about the trial
- Regulatory document (e.g. Clinical Study Report, Drug Approval Package)
- Research ethics application
- Grant database summary (e.g. NIH RePORTER or Research Councils UK Gateway to Research)
- Personal communication with trialist
- Personal communication with the sponsor

## Risk of bias assessment

Responses underlined in green are potential markers for low risk of bias, and responses in **red** are potential markers for a risk of bias. Where questions relate only to sign posts to other questions, no formatting is used.

### Domain 1: Risk of bias arising from the randomization process

| Signalling questions                                                                                              | Comments                                                                                                                                                                                                                                     | Response options                                                                               |
|-------------------------------------------------------------------------------------------------------------------|----------------------------------------------------------------------------------------------------------------------------------------------------------------------------------------------------------------------------------------------|------------------------------------------------------------------------------------------------|
| <b>1.1 Was the allocation sequence random?</b>                                                                    | Patients randomly (draw tab) were divided in three groups: Group 1 corticosteroid therapy, corticosteroid therapy and CO2 laser therapy in Group 2 and Group 3 corticosteroid therapy and laser placebo. Corticosteroid<br><br>Not informed. | <u>Y</u> / PY / PN / N / NI                                                                    |
| <b>1.2 Was the allocation sequence concealed until participants were enrolled and assigned to interventions?</b>  |                                                                                                                                                                                                                                              | <u>Y</u> / PY / PN / N / <u>N</u>                                                              |
| <b>1.3 Did baseline differences between intervention groups suggest a problem with the randomization process?</b> | No because size of ulcer was predefined in inclusion criteria. And any systemic disease was excluded.                                                                                                                                        | Y / PY / <b>PN</b> / <u>N</u> / NI                                                             |
| <b>Risk-of-bias judgement</b>                                                                                     | Not sure if the participant aware of the intervention since VAS score may be affected by patient perception                                                                                                                                  | Low / High / <u>Some concerns</u>                                                              |
| Optional: What is the predicted direction of bias arising from the randomization process?                         |                                                                                                                                                                                                                                              | NA / Favours experimental / Favours comparator / Towards null / Away from null / Unpredictable |

Domain 2: Risk of bias due to deviations from the intended interventions (*effect of assignment to intervention*)

| Signalling questions                                                                                                                                                           | Comments                                                                                                                                                                                                                                                    | Response options                                                                               |
|--------------------------------------------------------------------------------------------------------------------------------------------------------------------------------|-------------------------------------------------------------------------------------------------------------------------------------------------------------------------------------------------------------------------------------------------------------|------------------------------------------------------------------------------------------------|
| 2.1. Were participants aware of their assigned intervention during the trial?                                                                                                  | Not informed                                                                                                                                                                                                                                                | Y / PY / <u>PN</u> / N / <u>NI</u>                                                             |
| 2.2. Were carers and people delivering the interventions aware of participants' assigned intervention during the trial?                                                        | Not informed                                                                                                                                                                                                                                                | Y / PY / <u>PN</u> / N / <u>NI</u>                                                             |
| 2.3. If <u>Y/PY/NI</u> to 2.1 or 2.2: Were there deviations from the intended intervention that arose because of the trial context?                                            | Probably no because intervention following protocol.                                                                                                                                                                                                        | <u>NA</u> / Y / PY / <u>PN</u> / N / NI                                                        |
| 2.4. If <u>Y/PY</u> to 2.3: Were these deviations likely to have affected the outcome?                                                                                         | -                                                                                                                                                                                                                                                           | NA / Y / PY / <u>PN</u> / N / NI                                                               |
| 2.5. If <u>Y/PY/NI</u> to 2.4: Were these deviations from intended intervention balanced between groups?                                                                       | -                                                                                                                                                                                                                                                           | NA / <u>Y</u> / PY / PN / N / NI                                                               |
| 2.6. Was an appropriate analysis used to estimate the effect of assignment to intervention?                                                                                    | General Linear Model analysis and repeated measurement was used to evaluate the severity of pain and ulcer size as well as the Generalized Estimated Equation (GEE) analysis was done to assess clinical improvement and p<0.05 was considered significant. | <u>Y</u> / <u>PY</u> / PN / N / NI                                                             |
| 2.7. If <u>N/PN/NI</u> to 2.6: Was there potential for a substantial impact (on the result) of the failure to analyse participants in the group to which they were randomized? | -                                                                                                                                                                                                                                                           | NA / Y / PY / <u>PN</u> / N / NI                                                               |
| Risk-of-bias judgement                                                                                                                                                         |                                                                                                                                                                                                                                                             | Low / High / <u>Some concerns</u>                                                              |
| Optional: What is the predicted direction of bias due to deviations from intended interventions?                                                                               |                                                                                                                                                                                                                                                             | NA / Favours experimental / Favours comparator / Towards null / Away from null / Unpredictable |

Domain 2: Risk of bias due to deviations from the intended interventions (*effect of adhering to intervention*)

| Signalling questions                                                                                                                              | Comments | Response options                                                                               |
|---------------------------------------------------------------------------------------------------------------------------------------------------|----------|------------------------------------------------------------------------------------------------|
| 2.1. Were participants aware of their assigned intervention during the trial?                                                                     |          | Y / PY / <u>PN / N</u> / NI                                                                    |
| 2.2. Were carers and people delivering the interventions aware of participants' assigned intervention during the trial?                           |          | Y / PY / <u>PN / N</u> / NI                                                                    |
| 2.3. [If applicable:] <u>If Y/PY/NI to 2.1 or 2.2:</u> Were important non-protocol interventions balanced across intervention groups?             |          | NA / <u>Y / PY</u> / PN / N / NI                                                               |
| 2.4. [If applicable:] Were there failures in implementing the intervention that could have affected the outcome?                                  |          | NA / Y / PY / <u>PN / N</u> / NI                                                               |
| 2.5. [If applicable:] Was there non-adherence to the assigned intervention regimen that could have affected participants' outcomes?               |          | NA / Y / PY / <u>PN / N</u> / NI                                                               |
| 2.6. <u>If N/PN/NI to 2.3, or Y/PY/NI to 2.4 or 2.5:</u> Was an appropriate analysis used to estimate the effect of adhering to the intervention? |          | NA / <u>Y / PY</u> / PN / N / NI                                                               |
| Risk-of-bias judgement                                                                                                                            |          | Low / High / Some concerns                                                                     |
| Optional: What is the predicted direction of bias due to deviations from intended interventions?                                                  |          | NA / Favours experimental / Favours comparator / Towards null / Away from null / Unpredictable |

Domain 3: Missing outcome data

| Signalling questions                                                                                           | Comments                                                                                                                                                                                             | Response options                                                                               |
|----------------------------------------------------------------------------------------------------------------|------------------------------------------------------------------------------------------------------------------------------------------------------------------------------------------------------|------------------------------------------------------------------------------------------------|
| <b>3.1 Were data for this outcome available for all, or nearly all, participants randomized?</b>               | After leaving two patients during the study, 43 patients were evaluated in three groups including conventional therapy group (n=14), placebo group (n=14) and CO2 laser therapy group (15 patients). | Y / PY / PN / <b>N</b> / NI                                                                    |
| <b>3.2 If <u>N/PN/NI</u> to 3.1: Is there evidence that the result was not biased by missing outcome data?</b> | Patient drop out during study.                                                                                                                                                                       | <b>NA</b> / Y / PY / PN / N                                                                    |
| <b>3.3 If <u>N/PN</u> to 3.2: Could missingness in the outcome depend on its true value?</b>                   | Not informed.                                                                                                                                                                                        | NA / Y / PY / PN / N / <b>NI</b>                                                               |
| <b>3.4 If <u>Y/PY/NI</u> to 3.3: Is it likely that missingness in the outcome depended on its true value?</b>  | Not informed.                                                                                                                                                                                        | NA / Y / PY / PN / N / NI                                                                      |
| <b>Risk-of-bias judgement</b>                                                                                  |                                                                                                                                                                                                      | Low / High / <b>Some concerns</b>                                                              |
| Optional: What is the predicted direction of bias due to missing outcome data?                                 |                                                                                                                                                                                                      | NA / Favours experimental / Favours comparator / Towards null / Away from null / Unpredictable |

Domain 4: Risk of bias in measurement of the outcome

| Signalling questions                                                                                                            | Comments                                                                                                                                                                                                                                              | Response options                                                                               |
|---------------------------------------------------------------------------------------------------------------------------------|-------------------------------------------------------------------------------------------------------------------------------------------------------------------------------------------------------------------------------------------------------|------------------------------------------------------------------------------------------------|
| 4.1 Was the method of measuring the outcome inappropriate?                                                                      | The severity of the pain was read using this mark and standard ruler and was recorded. In addition, the size of wound was measured using a Williams probe one day before laser therapy and and the first, fourth and seventh days after laser therapy | Y / PY / <u>PN</u> <input checked="" type="checkbox"/> / NI                                    |
| 4.2 Could measurement or ascertainment of the outcome have differed between intervention groups?                                | No because pain was based on patient self assessmentt. Wound size using Williams probe.                                                                                                                                                               | Y / PY / <u>PN</u> <input checked="" type="checkbox"/> / NI                                    |
| 4.3 If <u>N/PN/NI</u> to 4.1 and 4.2: Were outcome assessors aware of the intervention received by study participants?          | Not informed                                                                                                                                                                                                                                          | NA / Y / PY / <u>PN</u> / <u>N</u> <input checked="" type="checkbox"/> / NI                    |
| 4.4 If <u>Y/PY/NI</u> to 4.3: Could assessment of the outcome have been influenced by knowledge of intervention received?       | No because one is self assessed the wound size is using probe clinically.                                                                                                                                                                             | NA / Y / PY / <u>PN</u> <input checked="" type="checkbox"/> / NI                               |
| 4.5 If <u>Y/PY/NI</u> to 4.4: Is it likely that assessment of the outcome was influenced by knowledge of intervention received? | -                                                                                                                                                                                                                                                     | NA / Y / PY / <u>PN</u> <input checked="" type="checkbox"/> / NI                               |
| Risk-of-bias judgement                                                                                                          |                                                                                                                                                                                                                                                       | Low / High / <u>Some concerns</u>                                                              |
| Optional: What is the predicted direction of bias in measurement of the outcome?                                                |                                                                                                                                                                                                                                                       | NA / Favours experimental / Favours comparator / Towards null / Away from null / Unpredictable |

Domain 5: Risk of bias in selection of the reported result

| Signalling questions                                                                                                                                                                              | Comments                                                                                                                                                                                                                                                                                                                                                                              | Response options                                                                                      |
|---------------------------------------------------------------------------------------------------------------------------------------------------------------------------------------------------|---------------------------------------------------------------------------------------------------------------------------------------------------------------------------------------------------------------------------------------------------------------------------------------------------------------------------------------------------------------------------------------|-------------------------------------------------------------------------------------------------------|
| <p><b>5.1 Were the data that produced this result analysed in accordance with a pre-specified analysis plan that was finalized before unblinded outcome data were available for analysis?</b></p> | <p>Yes. there was no significant difference between three groups of patients (placebo, conventional treatment group (<math>p=0.83</math>, <math>OR=0.91</math>) and the group treated with laser CO2 (<math>p=1.09</math>, <math>OR=0.82</math>)</p> <p>pain reduction in CO2 laser treatment group was more compared to the placebo laser treatment group (<math>p=0.001</math>)</p> | <p><input checked="" type="checkbox"/> Y / PY / PN / N / NI</p>                                       |
| <p><b>Is the numerical result being assessed likely to have been selected, on the basis of the results, from...</b></p>                                                                           |                                                                                                                                                                                                                                                                                                                                                                                       |                                                                                                       |
| <p><b>5.2. ... multiple eligible outcome measurements (e.g. scales, definitions, time points) within the outcome domain?</b></p>                                                                  | <p>No. VAS score in 100 mm scale.<br/>Wound size on first fourth and seventh day.</p>                                                                                                                                                                                                                                                                                                 | <p>Y / PY / PN <input checked="" type="checkbox"/> N / NI</p>                                         |
| <p><b>5.3 ... multiple eligible analyses of the data?</b></p>                                                                                                                                     | <p>No. Comparison of parameter among treatment groups.</p>                                                                                                                                                                                                                                                                                                                            | <p>Y / PY / PN <input checked="" type="checkbox"/> N / NI</p>                                         |
| <p><b>Risk-of-bias judgement</b></p>                                                                                                                                                              |                                                                                                                                                                                                                                                                                                                                                                                       | <p><input checked="" type="checkbox"/> Low / High / Some concerns</p>                                 |
| <p>Optional: What is the predicted direction of bias due to selection of the reported result?</p>                                                                                                 |                                                                                                                                                                                                                                                                                                                                                                                       | <p>NA / Favours experimental / Favours comparator / Towards null / Away from null / Unpredictable</p> |

Overall risk of bias

|                                                                             |  |                                                                                                |
|-----------------------------------------------------------------------------|--|------------------------------------------------------------------------------------------------|
| <b>Risk-of-bias judgement</b>                                               |  | Low / High / Some concerns                                                                     |
| Optional: What is the overall predicted direction of bias for this outcome? |  | NA / Favours experimental / Favours comparator / Towards null / Away from null / Unpredictable |

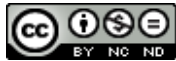

This work is licensed under a [Creative Commons Attribution-NonCommercial-NoDerivatives 4.0 International License](https://creativecommons.org/licenses/by-nc-nd/4.0/).



# Revised Cochrane risk-of-bias tool for randomized trials (RoB 2) TEMPLATE FOR COMPLETION

Edited by Julian PT Higgins, Jelena Savović, Matthew J Page, Jonathan AC Sterne  
on behalf of the RoB2 Development Group

**Version of 22 August 2019**

The development of the RoB 2 tool was supported by the MRC Network of Hubs for Trials Methodology Research (MR/L004933/2- N61), with the support of the host MRC ConDuCT-II Hub (Collaboration and innovation for Difficult and Complex randomised controlled Trials In Invasive procedures - MR/K025643/1), by MRC research grant MR/M025209/1, and by a grant from The Cochrane Collaboration.



This work is licensed under a [Creative Commons Attribution-NonCommercial-NoDerivatives 4.0 International License](https://creativecommons.org/licenses/by-nc-nd/4.0/).

## Study details

### Reference

Jahromi N. Z., Ghapanchi J., Pourshahidi S., Zahed M. EH. Clinical Evaluation of High and Low-Level Laser Treatment (Co2vsInGaAIP Diode Laser) for Recurrent Aphthous Stomatitis. J Dent Shiraz Univ Med Sci. 2017;18(1):17–23.

### Study design

- Individually-randomized parallel-group trial
- Cluster-randomized parallel-group trial
- Individually randomized cross-over (or other matched) trial

### For the purposes of this assessment, the interventions being compared are defined as

Experimental:

InGaAIP

Comparator:

Placebo

### Specify which outcome is being assessed for risk of bias

Reduced pain

**Specify the numerical result being assessed.** In case of multiple alternative analyses being presented, specify the numeric result (e.g. RR = 1.52 (95% CI 0.83 to 2.77) and/or a reference (e.g. to a table, figure or paragraph) that uniquely defines the result being assessed.

According to statistical analysis, pain reduction after treatment in group 1 was  $7.00 \pm 2.41$ , in group 2 was  $2.08 \pm 2.31$ , and in group 3 was  $1.40 \pm 1.77$ . In addition, a significant difference was observed in the reduction of functional complications in CO2 laser treated patients compared to the other two groups.

### Is the review team's aim for this result...?

- to assess the effect of *assignment to intervention* (the 'intention-to-treat' effect)
- to assess the effect of *adhering to intervention* (the 'per-protocol' effect)

**If the aim is to assess the effect of *adhering to intervention*, select the deviations from intended intervention that should be addressed (at least one must be checked):**

- occurrence of non-protocol interventions
- failures in implementing the intervention that could have affected the outcome
- non-adherence to their assigned intervention by trial participants

**Which of the following sources were obtained to help inform the risk-of-bias assessment? (tick as many as apply)**

- Journal article(s) with results of the trial
- Trial protocol
- Statistical analysis plan (SAP)
- Non-commercial trial registry record (e.g. ClinicalTrials.gov record)
- Company-owned trial registry record (e.g. GSK Clinical Study Register record)
- "Grey literature" (e.g. unpublished thesis)
- Conference abstract(s) about the trial
- Regulatory document (e.g. Clinical Study Report, Drug Approval Package)
- Research ethics application
- Grant database summary (e.g. NIH RePORTER or Research Councils UK Gateway to Research)
- Personal communication with trialist
- Personal communication with the sponsor

## Risk of bias assessment

Responses underlined in green are potential markers for low risk of bias, and responses in **red** are potential markers for a risk of bias. Where questions relate only to sign posts to other questions, no formatting is used.

### Domain 1: Risk of bias arising from the randomization process

| Signalling questions                                                                                       | Comments                                                                                                | Response options                                                                               |
|------------------------------------------------------------------------------------------------------------|---------------------------------------------------------------------------------------------------------|------------------------------------------------------------------------------------------------|
| 1.1 Was the allocation sequence random?                                                                    | The patients and the clinician who recorded the data were blind to the types of treatment applied.      | <u>Y</u> /PY / PN / N / NI                                                                     |
| 1.2 Was the allocation sequence concealed until participants were enrolled and assigned to interventions?  | Yes. The patients and the clinician who recorded the data were blind to the types of treatment applied. | <u>Y</u> /PY / PN / N / <u>NI</u>                                                              |
| 1.3 Did baseline differences between intervention groups suggest a problem with the randomization process? | Not informed VAS score among groups before treatment.                                                   | Y / PY / <u>PN</u> / <u>NI</u> / NI                                                            |
| Risk-of-bias judgement                                                                                     | We'd hope to obtain information about vas score before treatment among group.                           | Low / High / <u>Some concerns</u>                                                              |
| Optional: What is the predicted direction of bias arising from the randomization process?                  |                                                                                                         | NA / Favours experimental / Favours comparator / Towards null / Away from null / Unpredictable |

Domain 2: Risk of bias due to deviations from the intended interventions (*effect of assignment to intervention*)

| Signalling questions                                                                                                                                                          | Comments                                                                                                                                                                              | Response options                                                                               |
|-------------------------------------------------------------------------------------------------------------------------------------------------------------------------------|---------------------------------------------------------------------------------------------------------------------------------------------------------------------------------------|------------------------------------------------------------------------------------------------|
| 2.1. Were participants aware of their assigned intervention during the trial?                                                                                                 | No information whether patient aware of treatment during the trial.                                                                                                                   | Y / PY / <u>PN</u> / <u>N</u> / <u>NI</u>                                                      |
| 2.2. Were carers and people delivering the interventions aware of participants' assigned intervention during the trial?                                                       | The clinician who recorded the data were blind to the types of treatment applied.                                                                                                     | Y / PY / <u>PN</u> / <u>N</u> / NI                                                             |
| 2.3. If <u>Y/PY/NI</u> to 2.1 or 2.2: Were there deviations from the intended intervention that arose because of the trial context?                                           | No because intervention was performed by clinician and based on protocol.                                                                                                             | NA / Y / PY / <u>PN</u> / <u>N</u> / NI                                                        |
| 2.4 If <u>Y/PY</u> to 2.3: Were these deviations likely to have affected the outcome?                                                                                         | -                                                                                                                                                                                     | NA / Y / PY / <u>PN</u> / <u>N</u> / NI                                                        |
| 2.5. If <u>Y/PY/NI</u> to 2.4: Were these deviations from intended intervention balanced between groups?                                                                      | -                                                                                                                                                                                     | NA / <u>Y</u> / <u>PY</u> / <u>PN</u> / <u>N</u> / NI                                          |
| 2.6 Was an appropriate analysis used to estimate the effect of assignment to intervention?                                                                                    | The collected data was analyzed statistically with Kruskal-Wallis, Mann-Whitney, Repeated measurement-one way ANOVA and Post Hoc Tests. The significant level in this study was 0.05. | <u>Y</u> / <u>PY</u> / <u>PN</u> / <u>N</u> / NI                                               |
| 2.7 If <u>N/PN/NI</u> to 2.6: Was there potential for a substantial impact (on the result) of the failure to analyse participants in the group to which they were randomized? | -                                                                                                                                                                                     | NA / Y / PY / <u>PN</u> / <u>N</u> / NI                                                        |
| <b>Risk-of-bias judgement</b>                                                                                                                                                 | Would like to get information whether patient aware of treatment because assessment using VAS                                                                                         | Low / High / <u>Some concerns</u>                                                              |
| Optional: What is the predicted direction of bias due to deviations from intended interventions?                                                                              |                                                                                                                                                                                       | NA / Favours experimental / Favours comparator / Towards null / Away from null / Unpredictable |

Domain 2: Risk of bias due to deviations from the intended interventions (*effect of adhering to intervention*)

| Signalling questions                                                                                                                              | Comments | Response options                                                                               |
|---------------------------------------------------------------------------------------------------------------------------------------------------|----------|------------------------------------------------------------------------------------------------|
| 2.1. Were participants aware of their assigned intervention during the trial?                                                                     |          | Y / PY / <u>PN / N</u> / NI                                                                    |
| 2.2. Were carers and people delivering the interventions aware of participants' assigned intervention during the trial?                           |          | Y / PY / <u>PN / N</u> / NI                                                                    |
| 2.3. [If applicable:] <u>If Y/PY/NI to 2.1 or 2.2:</u> Were important non-protocol interventions balanced across intervention groups?             |          | NA / <u>Y / PY</u> / PN / N / NI                                                               |
| 2.4. [If applicable:] Were there failures in implementing the intervention that could have affected the outcome?                                  |          | NA / Y / PY / <u>PN / N</u> / NI                                                               |
| 2.5. [If applicable:] Was there non-adherence to the assigned intervention regimen that could have affected participants' outcomes?               |          | NA / Y / PY / <u>PN / N</u> / NI                                                               |
| 2.6. <u>If N/PN/NI to 2.3, or Y/PY/NI to 2.4 or 2.5:</u> Was an appropriate analysis used to estimate the effect of adhering to the intervention? |          | NA / <u>Y / PY</u> / PN / N / NI                                                               |
| Risk-of-bias judgement                                                                                                                            |          | Low / High / Some concerns                                                                     |
| Optional: What is the predicted direction of bias due to deviations from intended interventions?                                                  |          | NA / Favours experimental / Favours comparator / Towards null / Away from null / Unpredictable |

Domain 3: Missing outcome data

| Signalling questions                                                                                    | Comments                                                         | Response options                                                                               |
|---------------------------------------------------------------------------------------------------------|------------------------------------------------------------------|------------------------------------------------------------------------------------------------|
| <b>3.1 Were data for this outcome available for all, or nearly all, participants randomized?</b>        | Yes number of participant included and data in result was equal. | <b>Y</b> / PY / PN / N / NI                                                                    |
| <b>3.2 If N/PN/NI to 3.1: Is there evidence that the result was not biased by missing outcome data?</b> | -                                                                | NA / Y / PY / PN / N                                                                           |
| <b>3.3 If N/PN to 3.2: Could missingness in the outcome depend on its true value?</b>                   | -                                                                | NA / Y / PY / PN / N / NI                                                                      |
| <b>3.4 If Y/PY/NI to 3.3: Is it likely that missingness in the outcome depended on its true value?</b>  | -                                                                | NA / Y / PY / PN / N / NI                                                                      |
| <b>Risk-of-bias judgement</b>                                                                           |                                                                  | <b>Low</b> / High / Some concerns                                                              |
| Optional: What is the predicted direction of bias due to missing outcome data?                          |                                                                  | NA / Favours experimental / Favours comparator / Towards null / Away from null / Unpredictable |

Domain 4: Risk of bias in measurement of the outcome

| Signalling questions                                                                                                            | Comments                                                                                                                                                                                                                                                                                 | Response options                                                                               |
|---------------------------------------------------------------------------------------------------------------------------------|------------------------------------------------------------------------------------------------------------------------------------------------------------------------------------------------------------------------------------------------------------------------------------------|------------------------------------------------------------------------------------------------|
| 4.1 Was the method of measuring the outcome inappropriate?                                                                      | No. Pain severity (both the idiopathic/ noncontact and contact pain) was evaluated with visual analogue scale (VAS) before and after treatment.<br><br>we recorded the day in which the lesion was reepithelialized while a remnant of lesion was still visible in clinical examination. | Y / PY / <u>PN</u> / <u>N</u> / NI                                                             |
| 4.2 Could measurement or ascertainment of the outcome have differed between intervention groups?                                | No because it is based on VAS a validated instrument and clinical examination of ulcer size.                                                                                                                                                                                             | Y / PY / <u>PN</u> / <u>N</u> / NI                                                             |
| 4.3 If <u>N/PN/NI</u> to 4.1 and 4.2: Were outcome assessors aware of the intervention received by study participants?          | Outcome assessor was blinded to which intervention was given.                                                                                                                                                                                                                            | NA / Y / PY / <u>PN</u> / <u>N</u> / NI                                                        |
| 4.4 If <u>Y/PY/NI</u> to 4.3: Could assessment of the outcome have been influenced by knowledge of intervention received?       | -                                                                                                                                                                                                                                                                                        | NA / Y / PY / <u>PN</u> / <u>N</u> / NI                                                        |
| 4.5 If <u>Y/PY/NI</u> to 4.4: Is it likely that assessment of the outcome was influenced by knowledge of intervention received? | -                                                                                                                                                                                                                                                                                        | NA / Y / PY / <u>PN</u> / <u>N</u> / NI                                                        |
| Risk-of-bias judgement                                                                                                          |                                                                                                                                                                                                                                                                                          | <u>Low</u> / High / Some concerns                                                              |
| Optional: What is the predicted direction of bias in measurement of the outcome?                                                |                                                                                                                                                                                                                                                                                          | NA / Favours experimental / Favours comparator / Towards null / Away from null / Unpredictable |



Domain 5: Risk of bias in selection of the reported result

| Signalling questions                                                                                                                                                                       | Comments                                                                                                                                | Response options                                                                               |
|--------------------------------------------------------------------------------------------------------------------------------------------------------------------------------------------|-----------------------------------------------------------------------------------------------------------------------------------------|------------------------------------------------------------------------------------------------|
| <b>5.1 Were the data that produced this result analysed in accordance with a pre-specified analysis plan that was finalized before unblinded outcome data were available for analysis?</b> | Probably yes, because there were statistical comparison for idiopathic pain, contact pain and repair time of lesions in result section. | <input checked="" type="checkbox"/> Y / PY / PN / N / NI                                       |
| <b>Is the numerical result being assessed likely to have been selected, on the basis of the results, from...</b>                                                                           |                                                                                                                                         |                                                                                                |
| <b>5.2. ... multiple eligible outcome measurements (e.g. scales, definitions, time points) within the outcome domain?</b>                                                                  | No, only VAS score and duration of ulcer repair.                                                                                        | Y / PY / PN / <input checked="" type="checkbox"/> N / NI                                       |
| <b>5.3 ... multiple eligible analyses of the data?</b>                                                                                                                                     | No. Only comparison of outcome parameter between group.                                                                                 | Y / PY / PN / <input checked="" type="checkbox"/> N / NI                                       |
| <b>Risk-of-bias judgement</b>                                                                                                                                                              |                                                                                                                                         | <input checked="" type="checkbox"/> Low / High / Some concerns                                 |
| Optional: What is the predicted direction of bias due to selection of the reported result?                                                                                                 |                                                                                                                                         | NA / Favours experimental / Favours comparator / Towards null / Away from null / Unpredictable |

Overall risk of bias

|                                                                             |  |                                                                                                |
|-----------------------------------------------------------------------------|--|------------------------------------------------------------------------------------------------|
| <b>Risk-of-bias judgement</b>                                               |  | Low / High / <u>Some concerns</u>                                                              |
| Optional: What is the overall predicted direction of bias for this outcome? |  | NA / Favours experimental / Favours comparator / Towards null / Away from null / Unpredictable |



This work is licensed under a [Creative Commons Attribution-NonCommercial-NoDerivatives 4.0 International License](https://creativecommons.org/licenses/by-nc-nd/4.0/).

Revised Cochrane risk-of-bias tool for randomized trials (RoB 2)  
TEMPLATE FOR COMPLETION

High Risk

Edited by Julian PT Higgins, Jelena Savović, Matthew J Page, Jonathan AC Sterne  
on behalf of the RoB2 Development Group

**Version of 22 August 2019**

The development of the RoB 2 tool was supported by the MRC Network of Hubs for Trials Methodology Research (MR/L004933/2- N61), with the support of the host MRC ConDuCT-II Hub (Collaboration and innovation for Difficult and Complex randomised controlled Trials In Invasive procedures - MR/K025643/1), by MRC research grant MR/M025209/1, and by a grant from The Cochrane Collaboration.



This work is licensed under a [Creative Commons Attribution-NonCommercial-NoDerivatives 4.0 International License](https://creativecommons.org/licenses/by-nc-nd/4.0/).

## Study details

### Reference

Mustafa NS, Kashmoola MA, ZulhelmiBaharudin M, Hashim HI, Jabbar OA, Alahmad BEM. A pilot study on the use of biolase in the treatment of recurrent aphthous ulcer. Brazilian J Oral Sci. 2018;17:1–10.

### Study design

- Individually-randomized parallel-group trial
- Cluster-randomized parallel-group trial
- Individually randomized cross-over (or other matched) trial

### For the purposes of this assessment, the interventions being compared are defined as

Experimental:

LLLT

Comparator:

Triamcinolone acetonide

### Specify which outcome is being assessed for risk of bias

pain reduction

**Specify the numerical result being assessed.** In case of multiple alternative analyses being presented, specify the numeric result (e.g. RR = 1.52 (95% CI 0.83 to 2.77) and/or a reference (e.g. to a table, figure or paragraph) that uniquely defines the result being assessed.

Both groups showed significant pain reduction immediately, day 3 and day 7. Higher reduction in pain intensity was observed immediately ( $p=0.001$ ) and 3 days ( $p=0.002$ ) after treatment in group 1 patients (LLLT) compared to group 2 patients (triamcinolone acetonide 0.1%).

### Is the review team's aim for this result...?

- to assess the effect of *assignment to intervention* (the 'intention-to-treat' effect)
- to assess the effect of *adhering to intervention* (the 'per-protocol' effect)

**If the aim is to assess the effect of *adhering to intervention*, select the deviations from intended intervention that should be addressed (at least one must be checked):**

- occurrence of non-protocol interventions
- failures in implementing the intervention that could have affected the outcome
- non-adherence to their assigned intervention by trial participants

**Which of the following sources were obtained to help inform the risk-of-bias assessment? (tick as many as apply)**

- Journal article(s) with results of the trial
- Trial protocol
- Statistical analysis plan (SAP)
- Non-commercial trial registry record (e.g. ClinicalTrials.gov record)
- Company-owned trial registry record (e.g. GSK Clinical Study Register record)
- "Grey literature" (e.g. unpublished thesis)
- Conference abstract(s) about the trial
- Regulatory document (e.g. Clinical Study Report, Drug Approval Package)
- Research ethics application
- Grant database summary (e.g. NIH RePORTER or Research Councils UK Gateway to Research)
- Personal communication with trialist
- Personal communication with the sponsor

## Risk of bias assessment

Responses underlined in green are potential markers for low risk of bias, and responses in **red** are potential markers for a risk of bias. Where questions relate only to sign posts to other questions, no formatting is used.

### Domain 1: Risk of bias arising from the randomization process

| Signalling questions                                                                                       | Comments     | Response options                                                                               |
|------------------------------------------------------------------------------------------------------------|--------------|------------------------------------------------------------------------------------------------|
| 1.1 Was the allocation sequence random?                                                                    | Not informed | <u>Y</u> / PY / PN / N / <del>NI</del>                                                         |
| 1.2 Was the allocation sequence concealed until participants were enrolled and assigned to interventions?  | Not informed | <u>Y</u> / PY / PN / N / <del>NI</del>                                                         |
| 1.3 Did baseline differences between intervention groups suggest a problem with the randomization process? | Not informed | Y / PY / <u>PN</u> / N / <del>NI</del>                                                         |
| Risk-of-bias judgement                                                                                     |              | Low / High / <del>Some concern</del>                                                           |
| Optional: What is the predicted direction of bias arising from the randomization process?                  |              | NA / Favours experimental / Favours comparator / Towards null / Away from null / Unpredictable |

Domain 2: Risk of bias due to deviations from the intended interventions (*effect of assignment to intervention*)

| Signalling questions                                                                                                                                                           | Comments                                                                                                                   | Response options                                                                               |
|--------------------------------------------------------------------------------------------------------------------------------------------------------------------------------|----------------------------------------------------------------------------------------------------------------------------|------------------------------------------------------------------------------------------------|
| 2.1. Were participants aware of their assigned intervention during the trial?                                                                                                  | Not informed                                                                                                               | Y / <u>PY</u> / <u>PN</u> / N / NI                                                             |
| 2.2. Were carers and people delivering the interventions aware of participants' assigned intervention during the trial?                                                        | Not informed                                                                                                               | Y / <u>PY</u> / <u>PN</u> / N / NI                                                             |
| 2.3. If <u>Y/PY/NI</u> to 2.1 or 2.2: Were there deviations from the intended intervention that arose because of the trial context?                                            | Probably no because there is intervention protocol                                                                         | NA / Y / PY / <u>PN</u> / N / <u>NI</u>                                                        |
| 2.4. If <u>Y/PY</u> to 2.3: Were these deviations likely to have affected the outcome?                                                                                         | -                                                                                                                          | NA / Y / PY / <u>PN</u> / N / <u>NI</u>                                                        |
| 2.5. If <u>Y/PY/NI</u> to 2.4: Were these deviations from intended intervention balanced between groups?                                                                       | -                                                                                                                          | NA / <u>Y</u> / <u>PY</u> / <u>PN</u> / N / <u>NI</u>                                          |
| 2.6. Was an appropriate analysis used to estimate the effect of assignment to intervention?                                                                                    | Intragroup and intergroup comparisons were evaluated using Wilcoxon Signed Rank Test and Mann Whitney U test respectively. | <u>Y</u> / <u>PY</u> / PN / N / NI                                                             |
| 2.7. If <u>N/PN/NI</u> to 2.6: Was there potential for a substantial impact (on the result) of the failure to analyse participants in the group to which they were randomized? | -                                                                                                                          | NA / Y / PY / <u>PN</u> / N / NI                                                               |
| <b>Risk-of-bias judgement</b>                                                                                                                                                  |                                                                                                                            | Low / <u>High</u> / Some concerns                                                              |
| Optional: What is the predicted direction of bias due to deviations from intended interventions?                                                                               |                                                                                                                            | NA / Favours experimental / Favours comparator / Towards null / Away from null / Unpredictable |

Domain 2: Risk of bias due to deviations from the intended interventions (*effect of adhering to intervention*)

| Signalling questions                                                                                                                              | Comments | Response options                                                                               |
|---------------------------------------------------------------------------------------------------------------------------------------------------|----------|------------------------------------------------------------------------------------------------|
| 2.1. Were participants aware of their assigned intervention during the trial?                                                                     |          | Y / PY / <u>PN / N</u> / NI                                                                    |
| 2.2. Were carers and people delivering the interventions aware of participants' assigned intervention during the trial?                           |          | Y / PY / <u>PN / N</u> / NI                                                                    |
| 2.3. [If applicable:] <u>If Y/PY/NI to 2.1 or 2.2:</u> Were important non-protocol interventions balanced across intervention groups?             |          | NA / <u>Y / PY</u> / PN / N / NI                                                               |
| 2.4. [If applicable:] Were there failures in implementing the intervention that could have affected the outcome?                                  |          | NA / Y / PY / <u>PN / N</u> / NI                                                               |
| 2.5. [If applicable:] Was there non-adherence to the assigned intervention regimen that could have affected participants' outcomes?               |          | NA / Y / PY / <u>PN / N</u> / NI                                                               |
| 2.6. <u>If N/PN/NI to 2.3, or Y/PY/NI to 2.4 or 2.5:</u> Was an appropriate analysis used to estimate the effect of adhering to the intervention? |          | NA / <u>Y / PY</u> / PN / N / NI                                                               |
| Risk-of-bias judgement                                                                                                                            |          | Low / High / Some concerns                                                                     |
| Optional: What is the predicted direction of bias due to deviations from intended interventions?                                                  |          | NA / Favours experimental / Favours comparator / Towards null / Away from null / Unpredictable |



Domain 3: Missing outcome data

| Signalling questions                                                                                    | Comments                                                       | Response options                                                                               |
|---------------------------------------------------------------------------------------------------------|----------------------------------------------------------------|------------------------------------------------------------------------------------------------|
| 3.1 Were data for this outcome available for all, or nearly all, participants randomized?               | Of all 30 patients included, 30 data were presented in result. | <input checked="" type="radio"/> Y / PY / PN / N / NI                                          |
| 3.2 If <b>N/PN/NI</b> to 3.1: Is there evidence that the result was not biased by missing outcome data? | -                                                              | NA / <input type="radio"/> Y / PY / PN / N                                                     |
| 3.3 If <b>N/PN</b> to 3.2: Could missingness in the outcome depend on its true value?                   | -                                                              | NA / <input type="radio"/> Y / PY / <input type="radio"/> PN / N / NI                          |
| 3.4 If <b>Y/PY/NI</b> to 3.3: Is it likely that missingness in the outcome depended on its true value?  | -                                                              | NA / <input type="radio"/> Y / PY / <input type="radio"/> PN / N / NI                          |
| Risk-of-bias judgement                                                                                  |                                                                | <input checked="" type="radio"/> Low / High / Some concerns                                    |
| Optional: What is the predicted direction of bias due to missing outcome data?                          |                                                                | NA / Favours experimental / Favours comparator / Towards null / Away from null / Unpredictable |

Domain 4: Risk of bias in measurement of the outcome

| Signalling questions                                                                                                            | Comments                                                                           | Response options                                                                               |
|---------------------------------------------------------------------------------------------------------------------------------|------------------------------------------------------------------------------------|------------------------------------------------------------------------------------------------|
| 4.1 Was the method of measuring the outcome inappropriate?                                                                      | Numerical Rating Scale (NRS-11) prior to treatment.                                | Y / PY / <u>PN</u> / <u>N</u> / NI                                                             |
| 4.2 Could measurement or ascertainment of the outcome have differed between intervention groups?                                | No because scale had been used Numerical Rating Scale (NRS-11) prior to treatment. | Y / PY / <u>PN</u> / <u>N</u> / NI                                                             |
| 4.3 If <u>N/PN/NI</u> to 4.1 and 4.2: Were outcome assessors aware of the intervention received by study participants?          | Not informed.                                                                      | NA / Y / PY / <u>PN</u> / <u>N</u> / <u>NI</u>                                                 |
| 4.4 If <u>Y/PY/NI</u> to 4.3: Could assessment of the outcome have been influenced by knowledge of intervention received?       | Not informed                                                                       | NA / Y / PY / <u>PN</u> / <u>N</u> / NI                                                        |
| 4.5 If <u>Y/PY/NI</u> to 4.4: Is it likely that assessment of the outcome was influenced by knowledge of intervention received? | Probably yes because NRS based on patient perception of pain.                      | NA / Y / <u>PY</u> / <u>PN</u> / <u>N</u> / NI                                                 |
| Risk-of-bias judgement                                                                                                          |                                                                                    | Low / <u>High</u> / Some concerns                                                              |
| Optional: What is the predicted direction of bias in measurement of the outcome?                                                |                                                                                    | NA / Favours experimental / Favours comparator / Towards null / Away from null / Unpredictable |

Domain 5: Risk of bias in selection of the reported result

| Signalling questions                                                                                                                                                                       | Comments                                                                             | Response options                                                                               |
|--------------------------------------------------------------------------------------------------------------------------------------------------------------------------------------------|--------------------------------------------------------------------------------------|------------------------------------------------------------------------------------------------|
| <b>5.1 Were the data that produced this result analysed in accordance with a pre-specified analysis plan that was finalized before unblinded outcome data were available for analysis?</b> | Probably yes because in result there were statistical analysis intra and intergroup. | Y / <u>PY</u> / PN / N / NI                                                                    |
| <b>Is the numerical result being assessed likely to have been selected, on the basis of the results, from...</b>                                                                           |                                                                                      |                                                                                                |
| <b>5.2. ... multiple eligible outcome measurements (e.g. scales, definitions, time points) within the outcome domain?</b>                                                                  | No because it only use the NRS score.                                                | Y / PY / <u>PN</u> / N / NI                                                                    |
| <b>5.3 ... multiple eligible analyses of the data?</b>                                                                                                                                     | No because it is compare intra and intergroup.                                       | Y / PY / <u>PN</u> / N / NI                                                                    |
| <b>Risk-of-bias judgement</b>                                                                                                                                                              |                                                                                      | <u>Low</u> / High / Some concerns                                                              |
| <b>Optional: What is the predicted direction of bias due to selection of the reported result?</b>                                                                                          |                                                                                      | NA / Favours experimental / Favours comparator / Towards null / Away from null / Unpredictable |

Overall risk of bias

|                                                                             |  |                                                                                                |
|-----------------------------------------------------------------------------|--|------------------------------------------------------------------------------------------------|
| <b>Risk-of-bias judgement</b>                                               |  | Low / <u>High</u> / Some concerns                                                              |
| Optional: What is the overall predicted direction of bias for this outcome? |  | NA / Favours experimental / Favours comparator / Towards null / Away from null / Unpredictable |



This work is licensed under a [Creative Commons Attribution-NonCommercial-NoDerivatives 4.0 International License](https://creativecommons.org/licenses/by-nc-nd/4.0/).

# Revised Cochrane risk-of-bias tool for randomized trials (RoB 2) TEMPLATE FOR COMPLETION

Edited by Julian PT Higgins, Jelena Savović, Matthew J Page, Jonathan AC Sterne  
on behalf of the RoB2 Development Group

**Version of 22 August 2019**

The development of the RoB 2 tool was supported by the MRC Network of Hubs for Trials Methodology Research (MR/L004933/2- N61), with the support of the host MRC ConDuCT-II Hub (Collaboration and innovation for Difficult and Complex randomised controlled Trials In Invasive procedures - MR/K025643/1), by MRC research grant MR/M025209/1, and by a grant from The Cochrane Collaboration.



This work is licensed under a [Creative Commons Attribution-NonCommercial-NoDerivatives 4.0 International License](https://creativecommons.org/licenses/by-nc-nd/4.0/).

## Study details

### Reference

Soliman HA, Mostafaa D. Clinical evaluation of 660 nm diode laser therapy on the pain, size and functional disorders of recurrent aphthous stomatitis. Open Access Maced J Med Sci. 2019;7(9):1516–22.

### Study design

- Individually-randomized parallel-group trial
- Cluster-randomized parallel-group trial
- Individually randomized cross-over (or other matched) trial

### For the purposes of this assessment, the interventions being compared are defined as

Experimental:

Diode laser

Comparator:

Sodium bicarbonate mouthwash

### Specify which outcome is being assessed for risk of bias

pain scores

**Specify the numerical result being assessed.** In case of multiple alternative analyses being presented, specify the numeric result (e.g. RR = 1.52 (95% CI 0.83 to 2.77) and/or a reference (e.g. to a table, figure or paragraph) that uniquely defines the result being assessed.

Table 2: Comparison of VAS pain score between the two study groups at different follow-up periods

### Is the review team's aim for this result...?

- to assess the effect of *assignment to intervention* (the 'intention-to-treat' effect)
- to assess the effect of *adhering to intervention* (the 'per-protocol' effect)

**If the aim is to assess the effect of *adhering to intervention*, select the deviations from intended intervention that should be addressed (at least one must be checked):**

- occurrence of non-protocol interventions
- failures in implementing the intervention that could have affected the outcome
- non-adherence to their assigned intervention by trial participants

**Which of the following sources were obtained to help inform the risk-of-bias assessment? (tick as many as apply)**

- Journal article(s) with results of the trial
- Trial protocol
- Statistical analysis plan (SAP)
- Non-commercial trial registry record (e.g. ClinicalTrials.gov record)
- Company-owned trial registry record (e.g. GSK Clinical Study Register record)
- "Grey literature" (e.g. unpublished thesis)
- Conference abstract(s) about the trial
- Regulatory document (e.g. Clinical Study Report, Drug Approval Package)
- Research ethics application
- Grant database summary (e.g. NIH RePORTER or Research Councils UK Gateway to Research)
- Personal communication with trialist
- Personal communication with the sponsor

## Risk of bias assessment

Responses underlined in green are potential markers for low risk of bias, and responses in **red** are potential markers for a risk of bias. Where questions relate only to sign posts to other questions, no formatting is used.

### Domain 1: Risk of bias arising from the randomization process

| Signalling questions                                                                                              | Comments                                                                                                                                                                                  | Response options                                                                               |
|-------------------------------------------------------------------------------------------------------------------|-------------------------------------------------------------------------------------------------------------------------------------------------------------------------------------------|------------------------------------------------------------------------------------------------|
| <b>1.1 Was the allocation sequence random?</b>                                                                    | A randomised selection was made to the included patients, and they were separated into two equal groups; Group A (study group) contained ten patients who received diode laser treatment. | <u>Y</u> / PY / PN / N / NI                                                                    |
| <b>1.2 Was the allocation sequence concealed until participants were enrolled and assigned to interventions?</b>  |                                                                                                                                                                                           | Yes because randomization was performed before the intervention.                               |
| <b>1.3 Did baseline differences between intervention groups suggest a problem with the randomization process?</b> | No because At the beginning of the treatment, there was no statistically significant difference between both groups on day 1 ( $p = 0.76$ ).                                              | Y / PY / PN / <u>NI</u> / NI                                                                   |
| <b>Risk-of-bias judgement</b>                                                                                     |                                                                                                                                                                                           | <u>Low</u> High / Some concerns                                                                |
| Optional: What is the predicted direction of bias arising from the randomization process?                         |                                                                                                                                                                                           | NA / Favours experimental / Favours comparator / Towards null / Away from null / Unpredictable |



Domain 2: Risk of bias due to deviations from the intended interventions (*effect of assignment to intervention*)

| Signalling questions                                                                                                                                                          | Comments                                                                                                                                                                                                                           | Response options                                                                               |
|-------------------------------------------------------------------------------------------------------------------------------------------------------------------------------|------------------------------------------------------------------------------------------------------------------------------------------------------------------------------------------------------------------------------------|------------------------------------------------------------------------------------------------|
| 2.1. Were participants aware of their assigned intervention during the trial?                                                                                                 | Not informed if the patient was given explanation before the intervention.                                                                                                                                                         | Y / PY / <u>PN</u> / N / <u>NI</u>                                                             |
| 2.2. Were carers and people delivering the interventions aware of participants' assigned intervention during the trial?                                                       | Not informed the people delivering the intervention was aware or not during the trial.                                                                                                                                             | Y / PY / <u>PN</u> / N / <u>NI</u>                                                             |
| 2.3. If <u>Y/PY/NI</u> to 2.1 or 2.2: Were there deviations from the intended intervention that arose because of the trial context?                                           | Probably no because intervention followed study protocol.                                                                                                                                                                          | NA / Y / PY / <u>PN</u> / N / NI                                                               |
| 2.4 If <u>Y/PY</u> to 2.3: Were these deviations likely to have affected the outcome?                                                                                         | -                                                                                                                                                                                                                                  | NA / Y / PY / <u>PN</u> / N / NI                                                               |
| 2.5. If <u>Y/PY/NI</u> to 2.4: Were these deviations from intended intervention balanced between groups?                                                                      | -                                                                                                                                                                                                                                  | NA / <u>Y</u> / PY / PN / N / NI                                                               |
| 2.6 Was an appropriate analysis used to estimate the effect of assignment to intervention?                                                                                    | Results were expressed as median or mean $\pm$ SD and t-test to appraise the significance of any variances between the two study groups. All correlations were estimated, and the statistical significance was set at $p < 0.05$ . | <u>Y</u> / <u>PY</u> / PN / N / NI                                                             |
| 2.7 If <u>N/PN/NI</u> to 2.6: Was there potential for a substantial impact (on the result) of the failure to analyse participants in the group to which they were randomized? | -                                                                                                                                                                                                                                  | NA / Y / PY / <u>PN</u> / N / NI                                                               |
| Risk-of-bias judgement                                                                                                                                                        |                                                                                                                                                                                                                                    | Low / High / <u>Some concerns</u>                                                              |
| Optional: What is the predicted direction of bias due to deviations from intended interventions?                                                                              |                                                                                                                                                                                                                                    | NA / Favours experimental / Favours comparator / Towards null / Away from null / Unpredictable |

Domain 2: Risk of bias due to deviations from the intended interventions (*effect of adhering to intervention*)

| Signalling questions                                                                                                                              | Comments | Response options                                                                               |
|---------------------------------------------------------------------------------------------------------------------------------------------------|----------|------------------------------------------------------------------------------------------------|
| 2.1. Were participants aware of their assigned intervention during the trial?                                                                     |          | Y / PY / <u>PN / N</u> / NI                                                                    |
| 2.2. Were carers and people delivering the interventions aware of participants' assigned intervention during the trial?                           |          | Y / PY / <u>PN / N</u> / NI                                                                    |
| 2.3. [If applicable:] <u>If Y/PY/NI to 2.1 or 2.2:</u> Were important non-protocol interventions balanced across intervention groups?             |          | NA / <u>Y / PY</u> / PN / N / NI                                                               |
| 2.4. [If applicable:] Were there failures in implementing the intervention that could have affected the outcome?                                  |          | NA / Y / PY / <u>PN / N</u> / NI                                                               |
| 2.5. [If applicable:] Was there non-adherence to the assigned intervention regimen that could have affected participants' outcomes?               |          | NA / Y / PY / <u>PN / N</u> / NI                                                               |
| 2.6. <u>If N/PN/NI to 2.3, or Y/PY/NI to 2.4 or 2.5:</u> Was an appropriate analysis used to estimate the effect of adhering to the intervention? |          | NA / <u>Y / PY</u> / PN / N / NI                                                               |
| Risk-of-bias judgement                                                                                                                            |          | Low / High / Some concerns                                                                     |
| Optional: What is the predicted direction of bias due to deviations from intended interventions?                                                  |          | NA / Favours experimental / Favours comparator / Towards null / Away from null / Unpredictable |

Domain 3: Missing outcome data

| Signalling questions                                                                                           | Comments                                                                                                                                                               | Response options                                                                               |
|----------------------------------------------------------------------------------------------------------------|------------------------------------------------------------------------------------------------------------------------------------------------------------------------|------------------------------------------------------------------------------------------------|
| <b>3.1 Were data for this outcome available for all, or nearly all, participants randomized?</b>               | In this clinical trial, 20 patients (13 males and 7 females) with clinically diagnosed MiRAS were allocated equally into 2 groups. Data in result is also 20 patients. | <u>Y</u> /PY / PN / N / NI                                                                     |
| <b>3.2 If <u>N/PN/NI</u> to 3.1: Is there evidence that the result was not biased by missing outcome data?</b> | -                                                                                                                                                                      | NA / <u>Y</u> /PY / PN / N                                                                     |
| <b>3.3 If <u>N/PN</u> to 3.2: Could missingness in the outcome depend on its true value?</b>                   | -                                                                                                                                                                      | NA / Y / PY / <u>PN</u> / N / NI                                                               |
| <b>3.4 If <u>Y/PY/NI</u> to 3.3: Is it likely that missingness in the outcome depended on its true value?</b>  | -                                                                                                                                                                      | NA / Y / PY / <u>PN</u> / N / NI                                                               |
| <b>Risk-of-bias judgement</b>                                                                                  |                                                                                                                                                                        | <u>Low</u> High / Some concerns                                                                |
| Optional: What is the predicted direction of bias due to missing outcome data?                                 |                                                                                                                                                                        | NA / Favours experimental / Favours comparator / Towards null / Away from null / Unpredictable |

Domain 4: Risk of bias in measurement of the outcome

| Signalling questions                                                                                                            | Comments                                                                                                           | Response options                                                                               |
|---------------------------------------------------------------------------------------------------------------------------------|--------------------------------------------------------------------------------------------------------------------|------------------------------------------------------------------------------------------------|
| 4.1 Was the method of measuring the outcome inappropriate?                                                                      | A visual analogue scale (VAS) was used. Ulcer size was measured using calibrated periodontal probe.                | Y / PY / <u>PN</u> / <u>N</u> / NI                                                             |
| 4.2 Could measurement or ascertainment of the outcome have differed between intervention groups?                                | No because had been predefined in study method.                                                                    | Y / PY / <u>PN</u> / <u>N</u> / NI                                                             |
| 4.3 If <u>N/PN/NI</u> to 4.1 and 4.2: Were outcome assessors aware of the intervention received by study participants?          | Not informed.                                                                                                      | NA / Y / PY / <u>PN</u> / <u>N</u> / <u>NI</u>                                                 |
| 4.4 If <u>Y/PY/NI</u> to 4.3: Could assessment of the outcome have been influenced by knowledge of intervention received?       | No because it was using objective assessment for ulcer size. And for pain score using VAS which was self assessed. | NA / Y / PY / <u>PN</u> / <u>N</u> / NI                                                        |
| 4.5 If <u>Y/PY/NI</u> to 4.4: Is it likely that assessment of the outcome was influenced by knowledge of intervention received? | -                                                                                                                  | NA / Y / PY / <u>PN</u> / <u>N</u> / NI                                                        |
| Risk-of-bias judgement                                                                                                          |                                                                                                                    | <u>Low</u> / High / Some concerns                                                              |
| Optional: What is the predicted direction of bias in measurement of the outcome?                                                |                                                                                                                    | NA / Favours experimental / Favours comparator / Towards null / Away from null / Unpredictable |

Domain 5: Risk of bias in selection of the reported result

| Signalling questions                                                                                                                                                                       | Comments                                                                   | Response options                                                                               |
|--------------------------------------------------------------------------------------------------------------------------------------------------------------------------------------------|----------------------------------------------------------------------------|------------------------------------------------------------------------------------------------|
| <b>5.1 Were the data that produced this result analysed in accordance with a pre-specified analysis plan that was finalized before unblinded outcome data were available for analysis?</b> | Probably yes because there was statistical analysis in the result section. | <input checked="" type="checkbox"/> Y / PY / PN / N / NI                                       |
| <b>Is the numerical result being assessed likely to have been selected, on the basis of the results, from...</b>                                                                           |                                                                            |                                                                                                |
| <b>5.2. ... multiple eligible outcome measurements (e.g. scales, definitions, time points) within the outcome domain?</b>                                                                  | No because it is directly comparing the parameter between group.           | Y / PY / PN / <input checked="" type="checkbox"/> N / NI                                       |
| <b>5.3 ... multiple eligible analyses of the data?</b>                                                                                                                                     | No only comparison between group.                                          | Y / PY / PN / <input checked="" type="checkbox"/> N / NI                                       |
| <b>Risk-of-bias judgement</b>                                                                                                                                                              |                                                                            | <input checked="" type="checkbox"/> Low / High / Some concerns                                 |
| <b>Optional: What is the predicted direction of bias due to selection of the reported result?</b>                                                                                          |                                                                            | NA / Favours experimental / Favours comparator / Towards null / Away from null / Unpredictable |

Overall risk of bias

|                                                                             |  |                                                                                                |
|-----------------------------------------------------------------------------|--|------------------------------------------------------------------------------------------------|
| <b>Risk-of-bias judgement</b>                                               |  | Low / High / <u>Some concerns</u>                                                              |
| Optional: What is the overall predicted direction of bias for this outcome? |  | NA / Favours experimental / Favours comparator / Towards null / Away from null / Unpredictable |



This work is licensed under a [Creative Commons Attribution-NonCommercial-NoDerivatives 4.0 International License](https://creativecommons.org/licenses/by-nc-nd/4.0/).

Revised Cochrane risk-of-bias tool for randomized trials (RoB 2)  
TEMPLATE FOR COMPLETION

Low Risk

Edited by Julian PT Higgins, Jelena Savović, Matthew J Page, Jonathan AC Sterne  
on behalf of the RoB2 Development Group

**Version of 22 August 2019**

The development of the RoB 2 tool was supported by the MRC Network of Hubs for Trials Methodology Research (MR/L004933/2- N61), with the support of the host MRC ConDuCT-II Hub (Collaboration and innovation for Difficult and Complex randomised controlled Trials In Invasive procedures - MR/K025643/1), by MRC research grant MR/M025209/1, and by a grant from The Cochrane Collaboration.



This work is licensed under a [Creative Commons Attribution-NonCommercial-NoDerivatives 4.0 International License](https://creativecommons.org/licenses/by-nc-nd/4.0/).

## Study details

### Reference

Bardellini E, Veneri F, Amadori F, Conti G, Majorana A. Photobiomodulation therapy for the management of recurrent aphthous stomatitis in children: Clinical effectiveness and parental satisfaction. *Med Oral Patol Oral y Cir Bucal*. 2020;25(4):e549–53.

### Study design

- Individually-randomized parallel-group trial
- Cluster-randomized parallel-group trial
- Individually randomized cross-over (or other matched) trial

### For the purposes of this assessment, the interventions being compared are defined as

Experimental: Diode laser

Comparator: Placebo

### Specify which outcome is being assessed for risk of bias

Pain reduction

**Specify the numerical result being assessed.** In case of multiple alternative analyses being presented, specify the numeric result (e.g. RR = 1.52 (95% CI 0.83 to 2.77) and/or a reference (e.g. to a table, figure or paragraph) that uniquely defines the result being assessed.

Table 2: Lesion diameters and VAS medians at T0, T1, T2

### Is the review team's aim for this result...?

- to assess the effect of *assignment to intervention* (the 'intention-to-treat' effect)
- to assess the effect of *adhering to intervention* (the 'per-protocol' effect)



**If the aim is to assess the effect of *adhering to intervention*, select the deviations from intended intervention that should be addressed (at least one must be checked):**

- occurrence of non-protocol interventions
- failures in implementing the intervention that could have affected the outcome
- non-adherence to their assigned intervention by trial participants

**Which of the following sources were obtained to help inform the risk-of-bias assessment? (tick as many as apply)**

- Journal article(s) with results of the trial
- Trial protocol
- Statistical analysis plan (SAP)
- Non-commercial trial registry record (e.g. ClinicalTrials.gov record)
- Company-owned trial registry record (e.g. GSK Clinical Study Register record)
- "Grey literature" (e.g. unpublished thesis)
- Conference abstract(s) about the trial
- Regulatory document (e.g. Clinical Study Report, Drug Approval Package)
- Research ethics application
- Grant database summary (e.g. NIH RePORTER or Research Councils UK Gateway to Research)
- Personal communication with trialist
- Personal communication with the sponsor

## Risk of bias assessment

Responses underlined in green are potential markers for low risk of bias, and responses in **red** are potential markers for a risk of bias. Where questions relate only to sign posts to other questions, no formatting is used.

### Domain 1: Risk of bias arising from the randomization process

| Signalling questions                                                                                              | Comments                                                                                                                                                                                                                                                                                                                                                                                                                  | Response options                                                                               |
|-------------------------------------------------------------------------------------------------------------------|---------------------------------------------------------------------------------------------------------------------------------------------------------------------------------------------------------------------------------------------------------------------------------------------------------------------------------------------------------------------------------------------------------------------------|------------------------------------------------------------------------------------------------|
| <b>1.1 Was the allocation sequence random?</b>                                                                    | patients were randomized into two groups by a computer code: group A which included patients receiving laser therapy and group B receiving sham therapy (placebo), i.e. the device was switched on but the hand piece did not work. Randomization was performed using an automatically generated list in a 1:1 block size for two patients. Patients included in the study were randomly assigned to one of the 2 groups. | <u>Y</u> / PY / PN / N / NI                                                                    |
| <b>1.2 Was the allocation sequence concealed until participants were enrolled and assigned to interventions?</b>  |                                                                                                                                                                                                                                                                                                                                                                                                                           | <u>Y</u> / PY / PN / N / NI                                                                    |
| <b>1.3 Did baseline differences between intervention groups suggest a problem with the randomization process?</b> | No significance difference in VAS score before treatment and either in lesion diameter                                                                                                                                                                                                                                                                                                                                    | Y / PY / PN / <u>N</u> / NI                                                                    |
| <b>Risk-of-bias judgement</b>                                                                                     |                                                                                                                                                                                                                                                                                                                                                                                                                           | <u>Low</u> / High / Some concerns                                                              |
| Optional: What is the predicted direction of bias arising from the randomization process?                         |                                                                                                                                                                                                                                                                                                                                                                                                                           | NA / Favours experimental / Favours comparator / Towards null / Away from null / Unpredictable |

Domain 2: Risk of bias due to deviations from the intended interventions (*effect of assignment to intervention*)

| Signalling questions                                                                                                                                                           | Comments                                                                                                                                                                                                                                                                                                                                   | Response options                                                                                  |
|--------------------------------------------------------------------------------------------------------------------------------------------------------------------------------|--------------------------------------------------------------------------------------------------------------------------------------------------------------------------------------------------------------------------------------------------------------------------------------------------------------------------------------------|---------------------------------------------------------------------------------------------------|
| <b>2.1. Were participants aware of their assigned intervention during the trial?</b>                                                                                           | Patients received the exact repetition of the treatment modality but without any laser emission: although switched off, the laser devices emitted the same sound and showed the same screen parameters when working in the effective PBMT modality.<br><br>Operators who performed the treatment were not blinded to the allocation group. | Y / PY / <input checked="" type="checkbox"/> PN / N / NI                                          |
| <b>2.2. Were carers and people delivering the interventions aware of participants' assigned intervention during the trial?</b>                                                 |                                                                                                                                                                                                                                                                                                                                            | <input checked="" type="checkbox"/> Y / PY / <input checked="" type="checkbox"/> PN / N / NI      |
| <b>2.3. If Y/PY/NI to 2.1 or 2.2: Were there deviations from the intended intervention that arose because of the trial context?</b>                                            | No because intervention conducted following study protocol.                                                                                                                                                                                                                                                                                | NA / Y / PY / <input checked="" type="checkbox"/> PN / N / NI                                     |
| <b>2.4. If Y/PY to 2.3: Were these deviations likely to have affected the outcome?</b>                                                                                         | -                                                                                                                                                                                                                                                                                                                                          | NA / Y / PY / <input checked="" type="checkbox"/> PN / N / NI                                     |
| <b>2.5. If Y/PY/NI to 2.4: Were these deviations from intended intervention balanced between groups?</b>                                                                       | -                                                                                                                                                                                                                                                                                                                                          | NA / <input checked="" type="checkbox"/> Y / PY / <input checked="" type="checkbox"/> PN / N / NI |
| <b>2.6. Was an appropriate analysis used to estimate the effect of assignment to intervention?</b>                                                                             | Concordance or differences in the frequency distribution between the two groups were tested using the Exact Fisher's test. Student t test was used to compare VAS and size between groups. A level of significance of 5 % was used                                                                                                         | <input checked="" type="checkbox"/> Y / PY / <input checked="" type="checkbox"/> PN / N / NI      |
| <b>2.7. If N/PN/NI to 2.6: Was there potential for a substantial impact (on the result) of the failure to analyse participants in the group to which they were randomized?</b> | -                                                                                                                                                                                                                                                                                                                                          | NA / Y / PY / <input checked="" type="checkbox"/> PN / N / NI                                     |
| <b>Risk-of-bias judgement</b>                                                                                                                                                  |                                                                                                                                                                                                                                                                                                                                            | <input checked="" type="checkbox"/> Low / High / Some concerns                                    |
| Optional: What is the predicted direction of bias due to deviations from intended interventions?                                                                               |                                                                                                                                                                                                                                                                                                                                            | NA / Favours experimental / Favours comparator / Towards null / Away from null / Unpredictable    |

Domain 2: Risk of bias due to deviations from the intended interventions (*effect of adhering to intervention*)

| Signalling questions                                                                                                                              | Comments | Response options                                                                               |
|---------------------------------------------------------------------------------------------------------------------------------------------------|----------|------------------------------------------------------------------------------------------------|
| 2.1. Were participants aware of their assigned intervention during the trial?                                                                     |          | Y / PY / <u>PN / N</u> / NI                                                                    |
| 2.2. Were carers and people delivering the interventions aware of participants' assigned intervention during the trial?                           |          | Y / PY / <u>PN / N</u> / NI                                                                    |
| 2.3. [If applicable:] <u>If Y/PY/NI to 2.1 or 2.2:</u> Were important non-protocol interventions balanced across intervention groups?             |          | NA / <u>Y / PY</u> / PN / N / NI                                                               |
| 2.4. [If applicable:] Were there failures in implementing the intervention that could have affected the outcome?                                  |          | NA / Y / PY / <u>PN / N</u> / NI                                                               |
| 2.5. [If applicable:] Was there non-adherence to the assigned intervention regimen that could have affected participants' outcomes?               |          | NA / Y / PY / <u>PN / N</u> / NI                                                               |
| 2.6. <u>If N/PN/NI to 2.3, or Y/PY/NI to 2.4 or 2.5:</u> Was an appropriate analysis used to estimate the effect of adhering to the intervention? |          | NA / <u>Y / PY</u> / PN / N / NI                                                               |
| Risk-of-bias judgement                                                                                                                            |          | Low / High / Some concerns                                                                     |
| Optional: What is the predicted direction of bias due to deviations from intended interventions?                                                  |          | NA / Favours experimental / Favours comparator / Towards null / Away from null / Unpredictable |

Domain 3: Missing outcome data

| Signalling questions                                                                                    | Comments                                                             | Response options                                                                               |
|---------------------------------------------------------------------------------------------------------|----------------------------------------------------------------------|------------------------------------------------------------------------------------------------|
| <b>3.1 Were data for this outcome available for all, or nearly all, participants randomized?</b>        | Of all 30 participants, thirty data was presented in result section. | <input checked="" type="checkbox"/> Y / PY / PN / N / NI                                       |
| <b>3.2 If N/PN/NI to 3.1: Is there evidence that the result was not biased by missing outcome data?</b> | -                                                                    | NA / <input type="checkbox"/> Y / PY / PN / N                                                  |
| <b>3.3 If N/PN to 3.2: Could missingness in the outcome depend on its true value?</b>                   | -                                                                    | NA / <input type="checkbox"/> Y / PY / <input type="checkbox"/> PN / N / NI                    |
| <b>3.4 If Y/PY/NI to 3.3: Is it likely that missingness in the outcome depended on its true value?</b>  |                                                                      | NA / <input type="checkbox"/> Y / PY / <input type="checkbox"/> PN / N / NI                    |
| <b>Risk-of-bias judgement</b>                                                                           |                                                                      | <input checked="" type="checkbox"/> Low / High / Some concerns                                 |
| Optional: What is the predicted direction of bias due to missing outcome data?                          |                                                                      | NA / Favours experimental / Favours comparator / Towards null / Away from null / Unpredictable |

Domain 4: Risk of bias in measurement of the outcome

| Signalling questions                                                                                                            | Comments                                                                                               | Response options                                                                               |
|---------------------------------------------------------------------------------------------------------------------------------|--------------------------------------------------------------------------------------------------------|------------------------------------------------------------------------------------------------|
| 4.1 Was the method of measuring the outcome inappropriate?                                                                      | Pain was evaluated through the Visual Analogue Scale (VAS) at the same timing of lesion measurement    | Y / PY / <u>PN</u> / NI                                                                        |
| 4.2 Could measurement or ascertainment of the outcome have differed between intervention groups?                                | No because VAS score is validated for self assessment and ulcer size was based on clinical evaluation. | Y / PY / <u>PN</u> / NI                                                                        |
| 4.3 If <u>N/PN/NI</u> to 4.1 and 4.2: Were outcome assessors aware of the intervention received by study participants?          | Yes investigator was not blinded.                                                                      | NA / <u>Y</u> / PY / <u>PN</u> / N / NI                                                        |
| 4.4 If <u>Y/PY/NI</u> to 4.3: Could assessment of the outcome have been influenced by knowledge of intervention received?       | No because pain score was self assessed and ulcer size measured using periodontal probe.               | NA / Y / PY / <u>PN</u> / N / NI                                                               |
| 4.5 If <u>Y/PY/NI</u> to 4.4: Is it likely that assessment of the outcome was influenced by knowledge of intervention received? | -                                                                                                      | NA / Y / PY / <u>PN</u> / N / NI                                                               |
| Risk-of-bias judgement                                                                                                          |                                                                                                        | <u>Low</u> / High / Some concerns                                                              |
| Optional: What is the predicted direction of bias in measurement of the outcome?                                                |                                                                                                        | NA / Favours experimental / Favours comparator / Towards null / Away from null / Unpredictable |

Domain 5: Risk of bias in selection of the reported result

| Signalling questions                                                                                                                                                                       | Comments                                                                | Response options                                                                                                                                             |
|--------------------------------------------------------------------------------------------------------------------------------------------------------------------------------------------|-------------------------------------------------------------------------|--------------------------------------------------------------------------------------------------------------------------------------------------------------|
| <b>5.1 Were the data that produced this result analysed in accordance with a pre-specified analysis plan that was finalized before unblinded outcome data were available for analysis?</b> | Probably yes because there were statistical analysis in result section. | <input checked="" type="checkbox"/> Y / <input type="checkbox"/> PY / <input type="checkbox"/> PN / <input type="checkbox"/> N / <input type="checkbox"/> NI |
| <b>Is the numerical result being assessed likely to have been selected, on the basis of the results, from...</b>                                                                           |                                                                         |                                                                                                                                                              |
| <b>5.2. ... multiple eligible outcome measurements (e.g. scales, definitions, time points) within the outcome domain?</b>                                                                  | No, primary outcome was compared between group.                         | <input type="checkbox"/> Y / <input type="checkbox"/> PY / <input type="checkbox"/> PN / <input checked="" type="checkbox"/> N / <input type="checkbox"/> NI |
| <b>5.3 ... multiple eligible analyses of the data?</b>                                                                                                                                     | No, primary outcome was directly compared between group.                | <input type="checkbox"/> Y / <input type="checkbox"/> PY / <input type="checkbox"/> PN / <input checked="" type="checkbox"/> N / <input type="checkbox"/> NI |
| <b>Risk-of-bias judgement</b>                                                                                                                                                              |                                                                         | <input checked="" type="checkbox"/> Low / <input type="checkbox"/> High / <input type="checkbox"/> Some concerns                                             |
| <b>Optional: What is the predicted direction of bias due to selection of the reported result?</b>                                                                                          |                                                                         | NA / Favours experimental / Favours comparator / Towards null / Away from null / Unpredictable                                                               |

Overall risk of bias

|                                                                             |  |                                                                                                |
|-----------------------------------------------------------------------------|--|------------------------------------------------------------------------------------------------|
| <b>Risk-of-bias judgement</b>                                               |  | Low / High / Some concerns                                                                     |
| Optional: What is the overall predicted direction of bias for this outcome? |  | NA / Favours experimental / Favours comparator / Towards null / Away from null / Unpredictable |

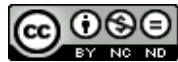

This work is licensed under a [Creative Commons Attribution-NonCommercial-NoDerivatives 4.0 International License](https://creativecommons.org/licenses/by-nc-nd/4.0/).



# Revised Cochrane risk-of-bias tool for randomized trials (RoB 2) TEMPLATE FOR COMPLETION

Edited by Julian PT Higgins, Jelena Savović, Matthew J Page, Jonathan AC Sterne  
on behalf of the RoB2 Development Group

**Version of 22 August 2019**

The development of the RoB 2 tool was supported by the MRC Network of Hubs for Trials Methodology Research (MR/L004933/2- N61), with the support of the host MRC ConDuCT-II Hub (Collaboration and innovation for Difficult and Complex randomised controlled Trials In Invasive procedures - MR/K025643/1), by MRC research grant MR/M025209/1, and by a grant from The Cochrane Collaboration.



This work is licensed under a [Creative Commons Attribution-NonCommercial-NoDerivatives 4.0 International License](https://creativecommons.org/licenses/by-nc-nd/4.0/).

## Study details

### Reference

Huo X, Han N, Liu L. Effect of different treatments on recurrent aphthous stomatitis: laser versus medication. *Lasers Med Sci.* 2021;36(5):1095–100.

### Study design

- Individually-randomized parallel-group trial
- Cluster-randomized parallel-group trial
- Individually randomized cross-over (or other matched) trial

### For the purposes of this assessment, the interventions being compared are defined as

Experimental: diode laser

Comparator: triamcinolone acetonide

### Specify which outcome is being assessed for risk of bias

painr reduction

**Specify the numerical result being assessed.** In case of multiple alternative analyses being presented, specify the numeric result (e.g. RR = 1.52 (95% CI 0.83 to 2.77) and/or a reference (e.g. to a table, figure or paragraph) that uniquely defines the result being assessed.

Table 2 Comparison of the VAS scores and healing time

### Is the review team's aim for this result...?

- to assess the effect of *assignment to intervention* (the 'intention-to-treat' effect)
- to assess the effect of *adhering to intervention* (the 'per-protocol' effect)

**If the aim is to assess the effect of *adhering to intervention*, select the deviations from intended intervention that should be addressed (at least one must be checked):**

- occurrence of non-protocol interventions
- failures in implementing the intervention that could have affected the outcome
- non-adherence to their assigned intervention by trial participants

**Which of the following sources were obtained to help inform the risk-of-bias assessment? (tick as many as apply)**

- Journal article(s) with results of the trial
- Trial protocol
- Statistical analysis plan (SAP)
- Non-commercial trial registry record (e.g. ClinicalTrials.gov record)
- Company-owned trial registry record (e.g. GSK Clinical Study Register record)
- "Grey literature" (e.g. unpublished thesis)
- Conference abstract(s) about the trial
- Regulatory document (e.g. Clinical Study Report, Drug Approval Package)
- Research ethics application
- Grant database summary (e.g. NIH RePORTER or Research Councils UK Gateway to Research)
- Personal communication with trialist
- Personal communication with the sponsor

## Risk of bias assessment

Responses underlined in green are potential markers for low risk of bias, and responses in **red** are potential markers for a risk of bias. Where questions relate only to sign posts to other questions, no formatting is used.

### Domain 1: Risk of bias arising from the randomization process

| Signalling questions                                                                                              | Comments                                                                                                                                                                                                 | Response options                                                                               |
|-------------------------------------------------------------------------------------------------------------------|----------------------------------------------------------------------------------------------------------------------------------------------------------------------------------------------------------|------------------------------------------------------------------------------------------------|
| <b>1.1 Was the allocation sequence random?</b>                                                                    | After written and verbal informed consent was obtained, the patients were randomly assigned to either laser or medication group using a block of random numbers generated by an assistant by Excel 2007. | <u>Y</u> / PY / PN / N / NI                                                                    |
| <b>1.2 Was the allocation sequence concealed until participants were enrolled and assigned to interventions?</b>  | Not informed.                                                                                                                                                                                            | Y / <u>PY</u> / PN / N / NI                                                                    |
| <b>1.3 Did baseline differences between intervention groups suggest a problem with the randomization process?</b> | No. No significant difference was noted in the spontaneous pain before treatment between the two groups ( $P > 0.05$ ).                                                                                  | Y / PY / <u>PN</u> / N / <u>NI</u>                                                             |
| <b>Risk-of-bias judgement</b>                                                                                     |                                                                                                                                                                                                          | Low / High / <u>Some concerns</u>                                                              |
| Optional: What is the predicted direction of bias arising from the randomization process?                         |                                                                                                                                                                                                          | NA / Favours experimental / Favours comparator / Towards null / Away from null / Unpredictable |

Domain 2: Risk of bias due to deviations from the intended interventions (*effect of assignment to intervention*)

| Signalling questions                                                                                                                                                           | Comments                                                                                                                  | Response options                                                                               |
|--------------------------------------------------------------------------------------------------------------------------------------------------------------------------------|---------------------------------------------------------------------------------------------------------------------------|------------------------------------------------------------------------------------------------|
| 2.1. Were participants aware of their assigned intervention during the trial?                                                                                                  | Not informed.                                                                                                             | Y / PY / <u>PN</u> / N / <u>NI</u>                                                             |
| 2.2. Were carers and people delivering the interventions aware of participants' assigned intervention during the trial?                                                        | Not informed.                                                                                                             | Y / PY / <u>PN</u> / N / <u>NI</u>                                                             |
| 2.3. If <u>Y/PY/NI</u> to 2.1 or 2.2: Were there deviations from the intended intervention that arose because of the trial context?                                            | Probably no because intervention following study protocol.                                                                | NA / Y / PY / <u>PN</u> / N / <u>NI</u>                                                        |
| 2.4. If <u>Y/PY</u> to 2.3: Were these deviations likely to have affected the outcome?                                                                                         | -                                                                                                                         | NA / Y / PY / <u>PN</u> / N / NI                                                               |
| 2.5. If <u>Y/PY/NI</u> to 2.4: Were these deviations from intended intervention balanced between groups?                                                                       | -                                                                                                                         | NA / <u>Y</u> / PY / PN / N / <u>NI</u>                                                        |
| 2.6. Was an appropriate analysis used to estimate the effect of assignment to intervention?                                                                                    | When applying a two-sided t test, the sample size was calculated and determined as 24, with 12 participants in each group | <u>Y</u> / PY / PN / N / NI                                                                    |
| 2.7. If <u>N/PN/NI</u> to 2.6: Was there potential for a substantial impact (on the result) of the failure to analyse participants in the group to which they were randomized? | -                                                                                                                         | NA / Y / PY / <u>PN</u> / N / NI                                                               |
| Risk-of-bias judgement                                                                                                                                                         |                                                                                                                           | Low / High / <u>Some concerns</u>                                                              |
| Optional: What is the predicted direction of bias due to deviations from intended interventions?                                                                               |                                                                                                                           | NA / Favours experimental / Favours comparator / Towards null / Away from null / Unpredictable |

Domain 2: Risk of bias due to deviations from the intended interventions (*effect of adhering to intervention*)

| Signalling questions                                                                                                                              | Comments | Response options                                                                               |
|---------------------------------------------------------------------------------------------------------------------------------------------------|----------|------------------------------------------------------------------------------------------------|
| 2.1. Were participants aware of their assigned intervention during the trial?                                                                     |          | Y / PY / <u>PN / N</u> / NI                                                                    |
| 2.2. Were carers and people delivering the interventions aware of participants' assigned intervention during the trial?                           |          | Y / PY / <u>PN / N</u> / NI                                                                    |
| 2.3. [If applicable:] <u>If Y/PY/NI to 2.1 or 2.2:</u> Were important non-protocol interventions balanced across intervention groups?             |          | NA / <u>Y / PY</u> / PN / N / NI                                                               |
| 2.4. [If applicable:] Were there failures in implementing the intervention that could have affected the outcome?                                  |          | NA / Y / PY / <u>PN / N</u> / NI                                                               |
| 2.5. [If applicable:] Was there non-adherence to the assigned intervention regimen that could have affected participants' outcomes?               |          | NA / Y / PY / <u>PN / N</u> / NI                                                               |
| 2.6. <u>If N/PN/NI to 2.3, or Y/PY/NI to 2.4 or 2.5:</u> Was an appropriate analysis used to estimate the effect of adhering to the intervention? |          | NA / <u>Y / PY</u> / PN / N / NI                                                               |
| Risk-of-bias judgement                                                                                                                            |          | Low / High / Some concerns                                                                     |
| Optional: What is the predicted direction of bias due to deviations from intended interventions?                                                  |          | NA / Favours experimental / Favours comparator / Towards null / Away from null / Unpredictable |

Domain 3: Missing outcome data

| Signalling questions                                                                                        | Comments                                                                                                         | Response options                                                                               |
|-------------------------------------------------------------------------------------------------------------|------------------------------------------------------------------------------------------------------------------|------------------------------------------------------------------------------------------------|
| 3.1 Were data for this outcome available for all, or nearly all, participants randomized?                   | Among the remaining 51 patients, 25 patients finished their treatment in laser group and 26 in medication group. | Y / PY / PN / <del>N</del> / NI                                                                |
| 3.2 If <del>N/PN/NI</del> to 3.1: Is there evidence that the result was not biased by missing outcome data? | In medication group, one patient discontinued the treatment because of nausea and one subject failed to contact. | NA / Y / PY / <del>PN</del> / N                                                                |
| 3.3 If <del>N/PN</del> to 3.2: Could missingness in the outcome depend on its true value?                   | -                                                                                                                | NA / Y / PY / <del>PN</del> / N / <del>NI</del>                                                |
| 3.4 If Y/PY/NI to 3.3: Is it likely that missingness in the outcome depended on its true value?             | -                                                                                                                | NA / Y / PY / <del>PN</del> / N / <del>NI</del>                                                |
| Risk-of-bias judgement                                                                                      |                                                                                                                  | Low / <del>High</del> / Some concerns                                                          |
| Optional: What is the predicted direction of bias due to missing outcome data?                              |                                                                                                                  | NA / Favours experimental / Favours comparator / Towards null / Away from null / Unpredictable |

Domain 4: Risk of bias in measurement of the outcome

| Signalling questions                                                                                                            | Comments                                                                                                   | Response options                                                                               |
|---------------------------------------------------------------------------------------------------------------------------------|------------------------------------------------------------------------------------------------------------|------------------------------------------------------------------------------------------------|
| 4.1 Was the method of measuring the outcome inappropriate?                                                                      | scale (VAS) before treatment, immediately after laser therapy for the first time, and on days 1, 3, and 7. | Y / PY / <u>PN</u> / <u>N</u> / NI                                                             |
| 4.2 Could measurement or ascertainment of the outcome have differed between intervention groups?                                | No because the outcome was measured by the same parameter between intervention group.                      | Y / PY / <u>PN</u> / <u>N</u> / NI                                                             |
| 4.3 If <u>N/PN/NI</u> to 4.1 and 4.2: Were outcome assessors aware of the intervention received by study participants?          | Not informed.                                                                                              | NA / Y / PY / <u>PN</u> / <u>N</u> / <u>NI</u>                                                 |
| 4.4 If <u>Y/PY/NI</u> to 4.3: Could assessment of the outcome have been influenced by knowledge of intervention received?       | -                                                                                                          | NA / Y / PY / <u>PN</u> / <u>N</u> / <u>NI</u>                                                 |
| 4.5 If <u>Y/PY/NI</u> to 4.4: Is it likely that assessment of the outcome was influenced by knowledge of intervention received? | -                                                                                                          | NA / Y / PY / <u>PN</u> / <u>N</u> / <u>NI</u>                                                 |
| Risk-of-bias judgement                                                                                                          |                                                                                                            | Low / High / <u>Some concerns</u>                                                              |
| Optional: What is the predicted direction of bias in measurement of the outcome?                                                |                                                                                                            | NA / Favours experimental / Favours comparator / Towards null / Away from null / Unpredictable |



Domain 5: Risk of bias in selection of the reported result

| Signalling questions                                                                                                                                                                       | Comments                                                                                                                                                                                                                                                                                       | Response options                                                                               |
|--------------------------------------------------------------------------------------------------------------------------------------------------------------------------------------------|------------------------------------------------------------------------------------------------------------------------------------------------------------------------------------------------------------------------------------------------------------------------------------------------|------------------------------------------------------------------------------------------------|
| <b>5.1 Were the data that produced this result analysed in accordance with a pre-specified analysis plan that was finalized before unblinded outcome data were available for analysis?</b> | Yes. Chi-square test was used to compare the differences between the groups including gender of the patients and location of the lesions. Mann-Whitney U test was used to compare the distribution of the patient age and lesion size before treatment after testing by Shapiro-Wilk's method. | <input checked="" type="checkbox"/> Y / PY / PN / N / NI                                       |
| <b>Is the numerical result being assessed likely to have been selected, on the basis of the results, from...</b>                                                                           |                                                                                                                                                                                                                                                                                                |                                                                                                |
| <b>5.2. ... multiple eligible outcome measurements (e.g. scales, definitions, time points) within the outcome domain?</b>                                                                  | No because only primary outcome compare between group.                                                                                                                                                                                                                                         | Y / PY / PN / <input checked="" type="checkbox"/> N / NI                                       |
| <b>5.3 ... multiple eligible analyses of the data?</b>                                                                                                                                     | No. It is based on primary outcome.                                                                                                                                                                                                                                                            | Y / PY / PN / <input checked="" type="checkbox"/> N / NI                                       |
| <b>Risk-of-bias judgement</b>                                                                                                                                                              |                                                                                                                                                                                                                                                                                                | <input checked="" type="checkbox"/> Low / High / Some concerns                                 |
| Optional: What is the predicted direction of bias due to selection of the reported result?                                                                                                 |                                                                                                                                                                                                                                                                                                | NA / Favours experimental / Favours comparator / Towards null / Away from null / Unpredictable |

Overall risk of bias

|                                                                             |  |                                                                                                |
|-----------------------------------------------------------------------------|--|------------------------------------------------------------------------------------------------|
| <b>Risk-of-bias judgement</b>                                               |  | Low / <b>High</b> / Some concerns                                                              |
| Optional: What is the overall predicted direction of bias for this outcome? |  | NA / Favours experimental / Favours comparator / Towards null / Away from null / Unpredictable |

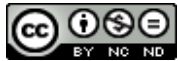

This work is licensed under a [Creative Commons Attribution-NonCommercial-NoDerivatives 4.0 International License](https://creativecommons.org/licenses/by-nc-nd/4.0/).

Revised Cochrane risk-of-bias tool for randomized trials (RoB)  
TEMPLATE FOR COMPLETION

Edited by Julian PT Higgins, Jelena Savović, Matthew J Page, Jonathan AC Sterne  
on behalf of the RoB2 Development Group

**Version of 22 August 2019**

High Risk

The development of the RoB 2 tool was supported by the MRC Network of Hubs for Trials Methodology Research (MR/L004933/2- N61), with the support of the host MRC ConDuCT-II Hub (Collaboration and innovation for Difficult and Complex randomised controlled Trials In Invasive procedures - MR/K025643/1), by MRC research grant MR/M025209/1, and by a grant from The Cochrane Collaboration.



This work is licensed under a [Creative Commons Attribution-NonCommercial-NoDerivatives 4.0 International License](https://creativecommons.org/licenses/by-nc-nd/4.0/).

## Study details

### Reference

Ghali HGH, Abdulhamed BS. Treatment of recurrent minor aphthous stomatitis using diode laser (940 nm). J Popul Ther Clin Pharmacol J la Ther des Popul la Pharmacol Clin. 2022;28(2):e99–112.

### Study design

- Individually-randomized parallel-group trial
- Cluster-randomized parallel-group trial
- Individually randomized cross-over (or other matched) trial

### For the purposes of this assessment, the interventions being compared are defined as

Experimental: Diode laser

Comparator: anginovag, placebo

### Specify which outcome is being assessed for risk of bias

pain reduction, healing time

**Specify the numerical result being assessed.** In case of multiple alternative analyses being presented, specify the numeric result (e.g. RR = 1.52 (95% CI 0.83 to 2.77) and/or a reference (e.g. to a table, figure or paragraph) that uniquely defines the result being assessed.

TABLE 2. Intra-Group Comparison of Pain VAS Score.

### Is the review team's aim for this result...?

- to assess the effect of *assignment to intervention* (the 'intention-to-treat' effect)
- to assess the effect of *adhering to intervention* (the 'per-protocol' effect)

If the aim is to assess the effect of *adhering to intervention*, select the deviations from intended intervention that should be addressed (at least one must be checked):

- occurrence of non-protocol interventions
- failures in implementing the intervention that could have affected the outcome
- non-adherence to their assigned intervention by trial participants

Which of the following sources were obtained to help inform the risk-of-bias assessment? (tick as many as apply)

- Journal article(s) with results of the trial
- Trial protocol
- Statistical analysis plan (SAP)
- Non-commercial trial registry record (e.g. ClinicalTrials.gov record)
- Company-owned trial registry record (e.g. GSK Clinical Study Register record)
- "Grey literature" (e.g. unpublished thesis)
- Conference abstract(s) about the trial
- Regulatory document (e.g. Clinical Study Report, Drug Approval Package)
- Research ethics application
- Grant database summary (e.g. NIH RePORTER or Research Councils UK Gateway to Research)
- Personal communication with trialist
- Personal communication with the sponsor

## Risk of bias assessment

Responses underlined in green are potential markers for low risk of bias, and responses in **red** are potential markers for a risk of bias. Where questions relate only to sign posts to other questions, no formatting is used.

### Domain 1: Risk of bias arising from the randomization process

| Signalling questions                                                                                              | Comments                                                                                       | Response options                                                                               |
|-------------------------------------------------------------------------------------------------------------------|------------------------------------------------------------------------------------------------|------------------------------------------------------------------------------------------------|
| <b>1.1 Was the allocation sequence random?</b>                                                                    | Not informed.                                                                                  | <u>Y</u> / <u>PY</u> / <b>PN</b> / <b>N</b> / <b>NI</b>                                        |
| <b>1.2 Was the allocation sequence concealed until participants were enrolled and assigned to interventions?</b>  | Not informed                                                                                   | <u>Y</u> / <u>PY</u> / <b>PN</b> / <b>N</b> / <b>NI</b>                                        |
| <b>1.3 Did baseline differences between intervention groups suggest a problem with the randomization process?</b> | Probabky no because VAS score between group before treatment showed no significant difference. | <b>Y</b> / <b>PY</b> / <u>PN</u> / <u>N</u> / <b>NI</b>                                        |
| <b>Risk-of-bias judgement</b>                                                                                     |                                                                                                | Low / High / <b>Some concerns</b>                                                              |
| Optional: What is the predicted direction of bias arising from the randomization process?                         |                                                                                                | NA / Favours experimental / Favours comparator / Towards null / Away from null / Unpredictable |

Domain 2: Risk of bias due to deviations from the intended interventions (*effect of assignment to intervention*)

| Signalling questions                                                                                                                                                           | Comments                                                  | Response options                                                                               |
|--------------------------------------------------------------------------------------------------------------------------------------------------------------------------------|-----------------------------------------------------------|------------------------------------------------------------------------------------------------|
| 2.1. Were participants aware of their assigned intervention during the trial?                                                                                                  | Not informed.                                             | Y / PY / <u>PN</u> / N / <u>NI</u>                                                             |
| 2.2. Were carers and people delivering the interventions aware of participants' assigned intervention during the trial?                                                        | Not informed.                                             | Y / PY / <u>PN</u> / N / <u>NI</u>                                                             |
| 2.3. If <u>Y/PY/NI</u> to 2.1 or 2.2: Were there deviations from the intended intervention that arose because of the trial context?                                            | Not informed.                                             | NA / Y / PY / <u>PN</u> / N / <u>NI</u>                                                        |
| 2.4. If <u>Y/PY</u> to 2.3: Were these deviations likely to have affected the outcome?                                                                                         | Probably no because VAS was self assessed by the patient. | NA / Y / PY / <u>PN</u> / N / NI                                                               |
| 2.5. If <u>Y/PY/NI</u> to 2.4: Were these deviations from intended intervention balanced between groups?                                                                       | -                                                         | NA / <u>Y/PY</u> / <u>PN</u> / N / <u>NI</u>                                                   |
| 2.6. Was an appropriate analysis used to estimate the effect of assignment to intervention?                                                                                    | No statistical analysis to compare the effect             | <u>Y/PY</u> / <u>PN</u> / N / NI                                                               |
| 2.7. If <u>N/PN/NI</u> to 2.6: Was there potential for a substantial impact (on the result) of the failure to analyse participants in the group to which they were randomized? | Compare the mean                                          | NA / Y / PY / <u>PN</u> / N / NI                                                               |
| <b>Risk-of-bias judgement</b>                                                                                                                                                  |                                                           | Low / High / <u>Some concerns</u>                                                              |
| Optional: What is the predicted direction of bias due to deviations from intended interventions?                                                                               |                                                           | NA / Favours experimental / Favours comparator / Towards null / Away from null / Unpredictable |

Domain 2: Risk of bias due to deviations from the intended interventions (*effect of adhering to intervention*)

| Signalling questions                                                                                                                              | Comments | Response options                                                                               |
|---------------------------------------------------------------------------------------------------------------------------------------------------|----------|------------------------------------------------------------------------------------------------|
| 2.1. Were participants aware of their assigned intervention during the trial?                                                                     |          | Y / PY / <u>PN / N</u> / NI                                                                    |
| 2.2. Were carers and people delivering the interventions aware of participants' assigned intervention during the trial?                           |          | Y / PY / <u>PN / N</u> / NI                                                                    |
| 2.3. [If applicable:] <u>If Y/PY/NI to 2.1 or 2.2:</u> Were important non-protocol interventions balanced across intervention groups?             |          | NA / <u>Y / PY</u> / PN / N / NI                                                               |
| 2.4. [If applicable:] Were there failures in implementing the intervention that could have affected the outcome?                                  |          | NA / Y / PY / <u>PN / N</u> / NI                                                               |
| 2.5. [If applicable:] Was there non-adherence to the assigned intervention regimen that could have affected participants' outcomes?               |          | NA / Y / PY / <u>PN / N</u> / NI                                                               |
| 2.6. <u>If N/PN/NI to 2.3, or Y/PY/NI to 2.4 or 2.5:</u> Was an appropriate analysis used to estimate the effect of adhering to the intervention? |          | NA / <u>Y / PY</u> / PN / N / NI                                                               |
| Risk-of-bias judgement                                                                                                                            |          | Low / High / Some concerns                                                                     |
| Optional: What is the predicted direction of bias due to deviations from intended interventions?                                                  |          | NA / Favours experimental / Favours comparator / Towards null / Away from null / Unpredictable |



Domain 3: Missing outcome data

| Signalling questions                                                                                           | Comments                                                                                                  | Response options                                                                               |
|----------------------------------------------------------------------------------------------------------------|-----------------------------------------------------------------------------------------------------------|------------------------------------------------------------------------------------------------|
| <b>3.1 Were data for this outcome available for all, or nearly all, participants randomized?</b>               | There were 7 participants in each group but no information whether all data were presented in the result. | <u>Y</u> / <u>PY</u> / <u>PN</u> / <u>N</u> / <u>NI</u>                                        |
| <b>3.2 If <u>N/PN/NI</u> to 3.1: Is there evidence that the result was not biased by missing outcome data?</b> | No                                                                                                        | <u>NA</u> / <u>Y</u> / <u>PY</u> / <u>PN</u> / <u>N</u>                                        |
| <b>3.3 If <u>N/PN</u> to 3.2: Could missingness in the outcome depend on its true value?</b>                   | Not informed                                                                                              | NA / <u>Y</u> / <u>PY</u> / <u>PN</u> / <u>N</u> / NI                                          |
| <b>3.4 If <u>Y/PY/NI</u> to 3.3: Is it likely that missingness in the outcome depended on its true value?</b>  |                                                                                                           | NA / <u>Y</u> / <u>PY</u> / <u>PN</u> / <u>N</u> / NI                                          |
| <b>Risk-of-bias judgement</b>                                                                                  | Not informed                                                                                              | Low / High / <u>some concerns</u>                                                              |
| Optional: What is the predicted direction of bias due to missing outcome data?                                 |                                                                                                           | NA / Favours experimental / Favours comparator / Towards null / Away from null / Unpredictable |

Domain 4: Risk of bias in measurement of the outcome

| Signalling questions                                                                                                            | Comments                                                                                                       | Response options                                                                               |
|---------------------------------------------------------------------------------------------------------------------------------|----------------------------------------------------------------------------------------------------------------|------------------------------------------------------------------------------------------------|
| 4.1 Was the method of measuring the outcome inappropriate?                                                                      | No, pain using VAS, diameter of ulcer using AUDM.                                                              | Y / PY / <u>PN</u> / <u>N</u> / NI                                                             |
| 4.2 Could measurement or ascertainment of the outcome have differed between intervention groups?                                | No because it is predefined.                                                                                   | Y / PY / <u>PN</u> / <u>N</u> / NI                                                             |
| 4.3 If <u>N/PN/NI</u> to 4.1 and 4.2: Were outcome assessors aware of the intervention received by study participants?          | Not informed.                                                                                                  | NA / Y / PY / <u>PN</u> / <u>N</u> / <u>NI</u>                                                 |
| 4.4 If <u>Y/PY/NI</u> to 4.3: Could assessment of the outcome have been influenced by knowledge of intervention received?       | Probably yes because patient self assessed the pain and might be affected by their perception on intervention. | NA / Y / <u>PY</u> / <u>PN</u> / <u>N</u> / NI                                                 |
| 4.5 If <u>Y/PY/NI</u> to 4.4: Is it likely that assessment of the outcome was influenced by knowledge of intervention received? | Probably yes because assessment of pain may be affected by patient perception over intervention.               | NA / Y / <u>PY</u> / <u>PN</u> / <u>N</u> / NI                                                 |
| Risk-of-bias judgement                                                                                                          |                                                                                                                | Low / <u>High</u> / Some concerns                                                              |
| Optional: What is the predicted direction of bias in measurement of the outcome?                                                |                                                                                                                | NA / Favours experimental / Favours comparator / Towards null / Away from null / Unpredictable |

Domain 5: Risk of bias in selection of the reported result

| Signalling questions                                                                                                                                                                       | Comments                                                                        | Response options                                                                               |
|--------------------------------------------------------------------------------------------------------------------------------------------------------------------------------------------|---------------------------------------------------------------------------------|------------------------------------------------------------------------------------------------|
| <b>5.1 Were the data that produced this result analysed in accordance with a pre-specified analysis plan that was finalized before unblinded outcome data were available for analysis?</b> | Yes because primary outcome obtained after measurement protocol was predefined. | Y / <b>PY</b> / PN / N / NI                                                                    |
| <b>Is the numerical result being assessed likely to have been selected, on the basis of the results, from...</b>                                                                           |                                                                                 |                                                                                                |
| <b>5.2. ... multiple eligible outcome measurements (e.g. scales, definitions, time points) within the outcome domain?</b>                                                                  | No only comparison between primary outcome.                                     | Y / PY / PN / <b>NI</b> / NI                                                                   |
| <b>5.3 ... multiple eligible analyses of the data?</b>                                                                                                                                     | No only based on primary outcome.                                               | Y / PY / PN / <b>NI</b> / NI                                                                   |
| <b>Risk-of-bias judgement</b>                                                                                                                                                              |                                                                                 | <b>Low</b> / High / Some concerns                                                              |
| Optional: What is the predicted direction of bias due to selection of the reported result?                                                                                                 |                                                                                 | NA / Favours experimental / Favours comparator / Towards null / Away from null / Unpredictable |

Overall risk of bias

|                                                                             |  |                                                                                                |
|-----------------------------------------------------------------------------|--|------------------------------------------------------------------------------------------------|
| <b>Risk-of-bias judgement</b>                                               |  | Low / <b>High</b> / Some concerns                                                              |
| Optional: What is the overall predicted direction of bias for this outcome? |  | NA / Favours experimental / Favours comparator / Towards null / Away from null / Unpredictable |



This work is licensed under a [Creative Commons Attribution-NonCommercial-NoDerivatives 4.0 International License](https://creativecommons.org/licenses/by-nc-nd/4.0/).

# Revised Cochrane risk-of-bias tool for randomized trials (RoB 2) TEMPLATE FOR COMPLETION

Edited by Julian PT Higgins, Jelena Savović, Matthew J Page, Jonathan AC Sterne  
on behalf of the RoB2 Development Group

**Version of 22 August 2019**

The development of the RoB 2 tool was supported by the MRC Network of Hubs for Trials Methodology Research (MR/L004933/2- N61), with the support of the host MRC ConDuCT-II Hub (Collaboration and innovation for Difficult and Complex randomised controlled Trials In Invasive procedures - MR/K025643/1), by MRC research grant MR/M025209/1, and by a grant from The Cochrane Collaboration.



This work is licensed under a [Creative Commons Attribution-NonCommercial-NoDerivatives 4.0 International License](https://creativecommons.org/licenses/by-nc-nd/4.0/).

## Study details

### Reference

Yilmaz HG, Albaba MR, Caygur A, Cengiz E, Boke-Karacaoglu F, Tumer H. Treatment of recurrent aphthous stomatitis with Er,Cr:YSGG laser irradiation: A randomized controlled split mouth clinical study. J Photochem Photobiol B Biol [Internet]. 2017;170:1–5. Available from: <http://dx.doi.org/10.1016/j.jphotobiol.2017.08.011>

### Study design

- Individually-randomized parallel-group trial
- Cluster-randomized parallel-group trial
- Individually randomized cross-over (or other matched) trial

### For the purposes of this assessment, the interventions being compared are defined as

Experimental: Er,Cr:YSGG Laser

Comparator: Placebo

### Specify which outcome is being assessed for risk of bias

pain reduction, healing time

**Specify the numerical result being assessed.** In case of multiple alternative analyses being presented, specify the numeric result (e.g. RR = 1.52 (95% CI 0.83 to 2.77) and/or a reference (e.g. to a table, figure or paragraph) that uniquely defines the result being assessed.

Table 1 Mean degree of VAS scores and standard deviation in both groups over 10 days.  
Table 2. Mean degree of HRAS scores and standard deviation in both groups over 10 days

### Is the review team's aim for this result...?

- to assess the effect of *assignment to intervention* (the 'intention-to-treat' effect)
- to assess the effect of *adhering to intervention* (the 'per-protocol' effect)

If the aim is to assess the effect of *adhering to intervention*, select the deviations from intended intervention that should be addressed (at least one must be checked):

- occurrence of non-protocol interventions
- failures in implementing the intervention that could have affected the outcome
- non-adherence to their assigned intervention by trial participants

Which of the following sources were obtained to help inform the risk-of-bias assessment? (tick as many as apply)

- Journal article(s) with results of the trial
- Trial protocol
- Statistical analysis plan (SAP)
- Non-commercial trial registry record (e.g. ClinicalTrials.gov record)
- Company-owned trial registry record (e.g. GSK Clinical Study Register record)
- "Grey literature" (e.g. unpublished thesis)
- Conference abstract(s) about the trial
- Regulatory document (e.g. Clinical Study Report, Drug Approval Package)
- Research ethics application
- Grant database summary (e.g. NIH RePORTER or Research Councils UK Gateway to Research)
- Personal communication with trialist
- Personal communication with the sponsor

## Risk of bias assessment

Responses underlined in green are potential markers for low risk of bias, and responses in **red** are potential markers for a risk of bias. Where questions relate only to sign posts to other questions, no formatting is used.

### Domain 1: Risk of bias arising from the randomization process

| Signalling questions                                                                                              | Comments                                                                                                                                                    | Response options                                                                               |
|-------------------------------------------------------------------------------------------------------------------|-------------------------------------------------------------------------------------------------------------------------------------------------------------|------------------------------------------------------------------------------------------------|
| <b>1.1 Was the allocation sequence random?</b>                                                                    | For each subject, selected RAS lesions were randomly assigned by the toss method to 2 groups: test (Fig. 1) or the control group in this split-mouth study. | <u>Y</u> / PY / PN / N / NI                                                                    |
| <b>1.2 Was the allocation sequence concealed until participants were enrolled and assigned to interventions?</b>  | Probably yes because randomization was conducted right before treatment was done.                                                                           | <u>Y</u> / PY / PN / N / NI                                                                    |
| <b>1.3 Did baseline differences between intervention groups suggest a problem with the randomization process?</b> | No because size of ulceration and duration of lesion was predefined.                                                                                        | Y / PY / PN / <u>N</u> / NI                                                                    |
| <b>Risk-of-bias judgement</b>                                                                                     |                                                                                                                                                             | <u>Low</u> High / Some concerns                                                                |
| Optional: What is the predicted direction of bias arising from the randomization process?                         |                                                                                                                                                             | NA / Favours experimental / Favours comparator / Towards null / Away from null / Unpredictable |



Domain 2: Risk of bias due to deviations from the intended interventions (*effect of assignment to intervention*)

| Signalling questions                                                                                                                                                          | Comments                                                                                                                                                                                                                                                                                                                                                                                                                                                                                                    | Response options                                                                              |
|-------------------------------------------------------------------------------------------------------------------------------------------------------------------------------|-------------------------------------------------------------------------------------------------------------------------------------------------------------------------------------------------------------------------------------------------------------------------------------------------------------------------------------------------------------------------------------------------------------------------------------------------------------------------------------------------------------|-----------------------------------------------------------------------------------------------|
| 2.1. Were participants aware of their assigned intervention during the trial?                                                                                                 | In the placebo group, RAS was irradiated by the same Er,Cr:YSGG laser without laser emission. All treatments (laser and placebo) were performed by the same investigator only at the first visit.                                                                                                                                                                                                                                                                                                           | Y / PY / <u>PN</u> / N / NI                                                                   |
| 2.2. Were carers and people delivering the interventions aware of participants' assigned intervention during the trial?                                                       | Yes because it was performed by the same investigator.                                                                                                                                                                                                                                                                                                                                                                                                                                                      | Y / <u>PY</u> / <u>PN</u> / N / NI                                                            |
| 2.3. If <u>Y/PY/NI</u> to 2.1 or 2.2: Were there deviations from the intended intervention that arose because of the trial context?                                           | No because procedure protocol was predefined.                                                                                                                                                                                                                                                                                                                                                                                                                                                               | NA / Y / PY / <u>PN</u> / N / <u>N</u>                                                        |
| 2.4 If <u>Y/PY</u> to 2.3: Were these deviations likely to have affected the outcome?                                                                                         | -                                                                                                                                                                                                                                                                                                                                                                                                                                                                                                           | NA / Y / PY / <u>PN</u> / N / NI                                                              |
| 2.5. If <u>Y/PY/NI</u> to 2.4: Were these deviations from intended intervention balanced between groups?                                                                      | -                                                                                                                                                                                                                                                                                                                                                                                                                                                                                                           | NA / <u>Y</u> / PY / <u>PN</u> / N / NI                                                       |
| 2.6 Was an appropriate analysis used to estimate the effect of assignment to intervention?                                                                                    | For all groups, mean values of the VAS scores were calculated. The normal distribution of all scores was evaluated with the Kolmogorov- Smirnov test. One-way repeated analysis of variance (ANOVA) was performed to assess the changes over timewithin the groups.When significance was detected, Tukey's test was performed for post hoc comparisons. A paired t-test was performed to compare the study groups at each follow-up periods. Values of p b 0.05 were accepted as statistically significant. | <u>Y</u> / <u>PY</u> / <u>PN</u> / N / NI                                                     |
| 2.7 If <u>N/PN/NI</u> to 2.6: Was there potential for a substantial impact (on the result) of the failure to analyse participants in the group to which they were randomized? | -                                                                                                                                                                                                                                                                                                                                                                                                                                                                                                           | NA / Y / PY / <u>PN</u> / N / NI                                                              |
| Risk-of-bias judgement                                                                                                                                                        |                                                                                                                                                                                                                                                                                                                                                                                                                                                                                                             | Low / High / <u>Some concerns</u>                                                             |
| Optional: What is the predicted direction of bias due to deviations from intended interventions?                                                                              |                                                                                                                                                                                                                                                                                                                                                                                                                                                                                                             | NA / Favours experimental / Favours comparator / Towards null /Away from null / Unpredictable |

Domain 2: Risk of bias due to deviations from the intended interventions (*effect of adhering to intervention*)

| Signalling questions                                                                                                                              | Comments | Response options                                                                               |
|---------------------------------------------------------------------------------------------------------------------------------------------------|----------|------------------------------------------------------------------------------------------------|
| 2.1. Were participants aware of their assigned intervention during the trial?                                                                     |          | Y / PY / <u>PN / N</u> / NI                                                                    |
| 2.2. Were carers and people delivering the interventions aware of participants' assigned intervention during the trial?                           |          | Y / PY / <u>PN / N</u> / NI                                                                    |
| 2.3. [If applicable:] <u>If Y/PY/NI to 2.1 or 2.2:</u> Were important non-protocol interventions balanced across intervention groups?             |          | NA / <u>Y / PY</u> / PN / N / NI                                                               |
| 2.4. [If applicable:] Were there failures in implementing the intervention that could have affected the outcome?                                  |          | NA / Y / PY / <u>PN / N</u> / NI                                                               |
| 2.5. [If applicable:] Was there non-adherence to the assigned intervention regimen that could have affected participants' outcomes?               |          | NA / Y / PY / <u>PN / N</u> / NI                                                               |
| 2.6. <u>If N/PN/NI to 2.3, or Y/PY/NI to 2.4 or 2.5:</u> Was an appropriate analysis used to estimate the effect of adhering to the intervention? |          | NA / <u>Y / PY</u> / PN / N / NI                                                               |
| Risk-of-bias judgement                                                                                                                            |          | Low / High / Some concerns                                                                     |
| Optional: What is the predicted direction of bias due to deviations from intended interventions?                                                  |          | NA / Favours experimental / Favours comparator / Towards null / Away from null / Unpredictable |

Domain 3: Missing outcome data

| Signalling questions                                                                                           | Comments                                                    | Response options                                                                                                                                             |
|----------------------------------------------------------------------------------------------------------------|-------------------------------------------------------------|--------------------------------------------------------------------------------------------------------------------------------------------------------------|
| <b>3.1 Were data for this outcome available for all, or nearly all, participants randomized?</b>               | Yes. Of forty included participants there were 40 outcomes. | <input checked="" type="checkbox"/> Y / <input type="checkbox"/> PY / <input type="checkbox"/> PN / <input type="checkbox"/> N / <input type="checkbox"/> NI |
| <b>3.2 If <u>N/PN/NI</u> to 3.1: Is there evidence that the result was not biased by missing outcome data?</b> | -                                                           | NA / <input type="checkbox"/> Y / <input type="checkbox"/> PY / <input type="checkbox"/> PN / <input type="checkbox"/> N                                     |
| <b>3.3 If <u>N/PN</u> to 3.2: Could missingness in the outcome depend on its true value?</b>                   | -                                                           | NA / <input type="checkbox"/> Y / <input type="checkbox"/> PY / <input type="checkbox"/> PN / <input type="checkbox"/> N / <input type="checkbox"/> NI       |
| <b>3.4 If <u>Y/PY/NI</u> to 3.3: Is it likely that missingness in the outcome depended on its true value?</b>  | -                                                           | NA / <input type="checkbox"/> Y / <input type="checkbox"/> PY / <input type="checkbox"/> PN / <input type="checkbox"/> N / <input type="checkbox"/> NI       |
| <b>Risk-of-bias judgement</b>                                                                                  |                                                             | <input checked="" type="checkbox"/> Low / High / Some concerns                                                                                               |
| Optional: What is the predicted direction of bias due to missing outcome data?                                 |                                                             | NA / Favours experimental / Favours comparator / Towards null / Away from null / Unpredictable                                                               |

Domain 4: Risk of bias in measurement of the outcome

| Signalling questions                                                                                                            | Comments                                                                               | Response options                                                                               |
|---------------------------------------------------------------------------------------------------------------------------------|----------------------------------------------------------------------------------------|------------------------------------------------------------------------------------------------|
| 4.1 Was the method of measuring the outcome inappropriate?                                                                      | Pain measure using VAS, healing process measured using HRAS.                           | Y / PY / <u>PN</u> / <u>N</u> / NI                                                             |
| 4.2 Could measurement or ascertainment of the outcome have differed between intervention groups?                                | No because it is based on subjective and clinical manifestation.                       | Y / PY / <u>PN</u> / <u>N</u> / NI                                                             |
| 4.3 If <u>N/PN/NI</u> to 4.1 and 4.2: Were outcome assessors aware of the intervention received by study participants?          | Probably no for VAS score. Not informed for HRAS.                                      | NA / Y / <u>PY</u> / <u>PN</u> / <u>N</u> / NI                                                 |
| 4.4 If <u>Y/PY/NI</u> to 4.3: Could assessment of the outcome have been influenced by knowledge of intervention received?       | Probably no because pain was self assessed and healing process is clinically assessed. | NA / Y / <u>PY</u> / <u>PN</u> / <u>N</u> / NI                                                 |
| 4.5 If <u>Y/PY/NI</u> to 4.4: Is it likely that assessment of the outcome was influenced by knowledge of intervention received? | -                                                                                      | NA / Y / <u>PY</u> / <u>PN</u> / <u>N</u> / NI                                                 |
| Risk-of-bias judgement                                                                                                          |                                                                                        | <u>Low</u> High / Some concerns                                                                |
| Optional: What is the predicted direction of bias in measurement of the outcome?                                                |                                                                                        | NA / Favours experimental / Favours comparator / Towards null / Away from null / Unpredictable |

Domain 5: Risk of bias in selection of the reported result

| Signalling questions                                                                                                                                                                       | Comments                                                                                          | Response options                                                                               |
|--------------------------------------------------------------------------------------------------------------------------------------------------------------------------------------------|---------------------------------------------------------------------------------------------------|------------------------------------------------------------------------------------------------|
| <b>5.1 Were the data that produced this result analysed in accordance with a pre-specified analysis plan that was finalized before unblinded outcome data were available for analysis?</b> | Probably yes because there was statistical comparison between group and between day of treatment. | Y / <b>PN</b> / PN / N / NI                                                                    |
| <b>Is the numerical result being assessed likely to have been selected, on the basis of the results, from...</b>                                                                           |                                                                                                   |                                                                                                |
| <b>5.2. ... multiple eligible outcome measurements (e.g. scales, definitions, time points) within the outcome domain?</b>                                                                  | No, only comparison of VAS score and HRAS.                                                        | Y / PY / <b>PN</b> / N / NI                                                                    |
| <b>5.3 ... multiple eligible analyses of the data?</b>                                                                                                                                     | No, only comparison between treatment group and days.                                             | Y / PY / <b>PN</b> / N / NI                                                                    |
| <b>Risk-of-bias judgement</b>                                                                                                                                                              |                                                                                                   | <b>Low</b> / High / Some concerns                                                              |
| Optional: What is the predicted direction of bias due to selection of the reported result?                                                                                                 |                                                                                                   | NA / Favours experimental / Favours comparator / Towards null / Away from null / Unpredictable |

Overall risk of bias

|                                                                             |  |                                                                                                |
|-----------------------------------------------------------------------------|--|------------------------------------------------------------------------------------------------|
| <b>Risk-of-bias judgement</b>                                               |  | Low / High / <u>Some concerns</u>                                                              |
| Optional: What is the overall predicted direction of bias for this outcome? |  | NA / Favours experimental / Favours comparator / Towards null / Away from null / Unpredictable |

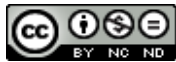

This work is licensed under a [Creative Commons Attribution-NonCommercial-NoDerivatives 4.0 International License](https://creativecommons.org/licenses/by-nc-nd/4.0/).
