# Supplementary material for: Effectiveness of low-level laser therapy in reducing pain score and healing time of recurrent aphthous stomatitis: a systematic review and meta-analysis
Source: PubMed Central journal article supplement (PMC11264394; doi:10.1186/s13643-024-02595-0), 2024-07-22
Supplement: 13643_2024_2595_MOESM2_ESM.pdf [file 13643_2024_2595_MOESM2_ESM.pdf]

## Formulating search statements

(low level laser therapy OR phototherapy laser OR biostimulation laser OR photobiomodulation therapy) AND recurrent aphthous stomatitis.

|              |                                       |
|--------------|---------------------------------------|
| Population   | Patient with recurrent aphthous ulcer |
| Intervention | Low-level laser therapy               |
| Control      | Placebo and medication                |
| Outcome      | Reduced pain score and healing time   |

Database searched: Pubmed, ScienceDirect and Scopus

Date of search: 1 January 1967 to 30 June 2022

Language restriction: English

We contact no individuals or organizations since the information required was assessed based on the article published.

Search strategy was documented in excel as below.

Records marked as ineligible by automation tools based on types of studies. Validated RCT filter were used to exclude study with different design.

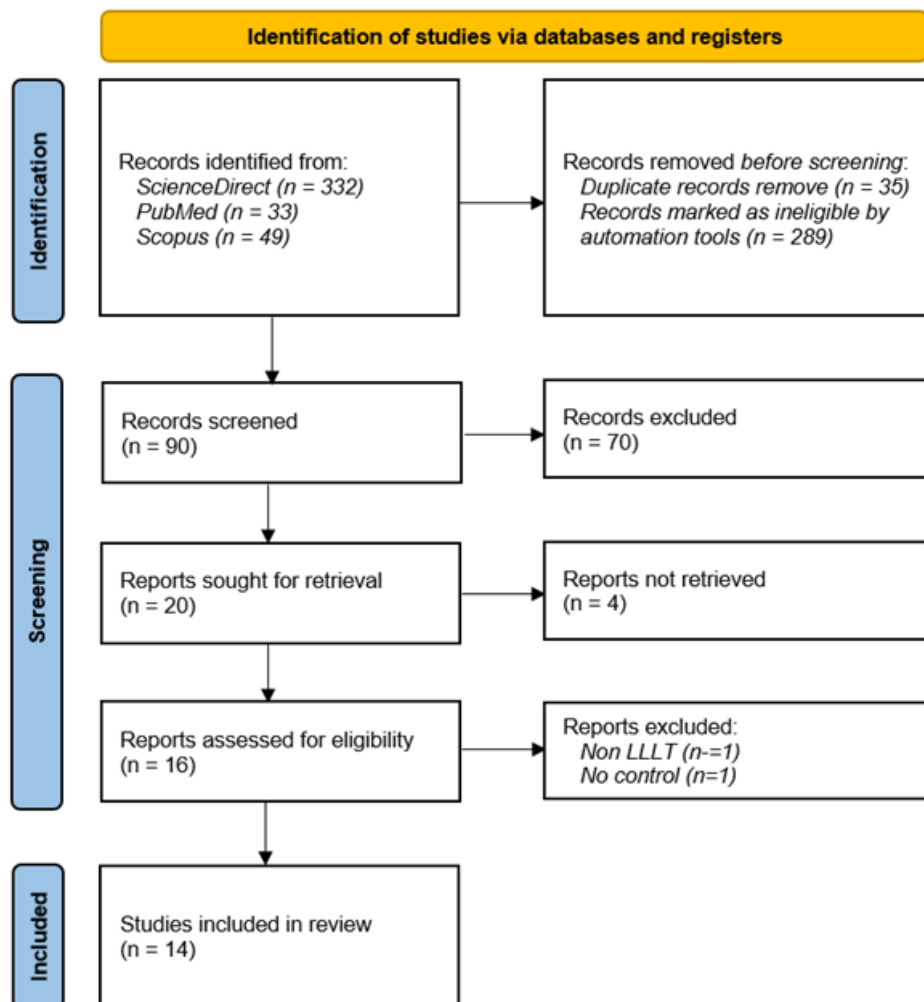



|   |   |   |      |                                                                                                                                                                |                 |               |
|---|---|---|------|----------------------------------------------------------------------------------------------------------------------------------------------------------------|-----------------|---------------|
|   |   | 1 | 2013 | 9 - Herbal approaches to system dysfunctions                                                                                                                   | Book Chapter    | ScienceDirect |
|   |   | 1 | 2021 | 9 - Systemic Antibacterial Agents                                                                                                                              | Book Chapter    | ScienceDirect |
|   |   | 1 | 2021 | A                                                                                                                                                              | Book Chapter    | ScienceDirect |
|   |   | 1 | 2014 | A                                                                                                                                                              | Book Chapter    | ScienceDirect |
|   |   | 1 | 2007 | A                                                                                                                                                              | Book Chapter    | ScienceDirect |
| 1 |   |   | 2017 | Moghadam-Kia S A diagnostic and therapeutic approach to primary burning mouth syndrome                                                                         | Journal Article | ScienceDirect |
| 1 |   |   | 1993 | Greer RO,Linden A A double-blind study of topically applied 5% amlexanox in the treatment of aphthous ulcers                                                   | Journal Article | ScienceDirect |
| 1 |   |   | 2012 | Meiller TF,Garbe A A Review of Common Oral Pathology Lesions, With a Focus on Periodontology and Implantology                                                  | Journal Article | ScienceDirect |
|   |   | 1 | 2005 | ABSTRACT BOOK                                                                                                                                                  | Journal Article | ScienceDirect |
|   |   | 1 | 2013 | Abstract Book                                                                                                                                                  | Journal Article | ScienceDirect |
|   |   | 1 | 1999 | Abstracts                                                                                                                                                      | Journal Article | ScienceDirect |
|   |   | 1 | 2010 | Abstracts                                                                                                                                                      | Journal Article | ScienceDirect |
|   |   | 1 | 1989 | Abstracts                                                                                                                                                      | Journal Article | ScienceDirect |
|   |   | 1 | 1998 | Abstracts of papers presented at the 52nd annual meeting of the American Academy of Oral Medicine                                                              | Journal Article | ScienceDirect |
|   |   | 1 | 1994 | Abstracts of papers presented at the American Academy of Oral Medicine Annual Meeting, Clearwater, Fla., April 27-29, 1994                                     | Journal Article | ScienceDirect |
| 1 |   |   | 2022 | Patil S,Mustaq S Advancement in therapeutic strategies for immune-mediated oral diseases                                                                       | Journal Article | ScienceDirect |
| 1 |   |   | 2009 | Parent D,Vallant Afe, aftosis, malattia di Behcet                                                                                                              | Journal Article | ScienceDirect |
|   |   | 1 | 2002 | AGA abstracts 82-724                                                                                                                                           | Journal Article | ScienceDirect |
|   |   | 1 | 2002 | AGA abstracts T1590-W1053                                                                                                                                      | Journal Article | ScienceDirect |
| 1 |   |   | 2000 | Halpern LR,Ogle Alternative Treatment Modalities for Orofacial Pain                                                                                            | Journal Article | ScienceDirect |
|   | 1 |   | 2019 | Cagna DR,Donof Annual review of selected scientific literature: A report of the Committee on Scientific Investigation of the American Academy of Oral Medicine | Journal Article | ScienceDirect |
|   | 1 |   | 2021 | Cagna DR,Donof Annual review of selected scientific literature: A report of the Committee on Scientific Investigation of the American Academy of Oral Medicine | Journal Article | ScienceDirect |
|   | 1 |   | 2000 | Sadick NS Antibiotics: unapproved uses or indications                                                                                                          | Journal Article | ScienceDirect |
|   | 1 |   | 2016 | Vaillant L,Samim Aphtes et ulcérations buccales                                                                                                                | Journal Article | ScienceDirect |
|   | 1 |   | 2016 | Aphthous Stomatitis                                                                                                                                            | Book Chapter    | ScienceDirect |
|   | 1 |   | 2007 | Boulanger BL Aphthous Ulcers                                                                                                                                   | Book Chapter    | ScienceDirect |
|   | 1 |   | 2021 | Appendix - Supplemental Material                                                                                                                               | Book Chapter    | ScienceDirect |
|   | 1 |   | 2013 | Prasad R, S.Pal A Assessment of immediate pain relief with laser treatment in recurrent aphthous stomatitis                                                    | Journal Article | ScienceDirect |
|   | 1 |   | 1997 | Author index                                                                                                                                                   | Journal Article | ScienceDirect |
|   | 1 |   | 1994 | Author index                                                                                                                                                   | Journal Article | ScienceDirect |
|   | 1 |   | 1996 | Author index                                                                                                                                                   | Journal Article | ScienceDirect |
|   | 1 |   | 1988 | Author index                                                                                                                                                   | Journal Article | ScienceDirect |
|   | 1 |   | 1997 | Author index                                                                                                                                                   | Journal Article | ScienceDirect |
|   | 1 |   | 1996 | Author index                                                                                                                                                   | Journal Article | ScienceDirect |
|   | 1 |   | 2011 | Sciubba JJ Autoimmune Oral Mucosal Diseases: Clinical, Etiologic, Diagnostic, and Treatment Considerations                                                     | Journal Article | ScienceDirect |
|   | 1 |   | 2013 | Auto-Immunity & Inflammation                                                                                                                                   | Journal Article | ScienceDirect |
|   | 1 |   | 2007 | Lachman RS B                                                                                                                                                   | Book Chapter    | ScienceDirect |
| 1 |   |   | 2017 | Bulur I,Onder M Behcet disease: New aspects                                                                                                                    | Journal Article | ScienceDirect |
|   | 1 |   | 2012 | Chan MH,Wolf JK Biopsy Techniques and Diagnoses & Treatment of Mucocutaneous Lesions                                                                           | Journal Article | ScienceDirect |
|   | 1 |   | 2003 | Drage LA,Rogers Burning mouth syndrome                                                                                                                         | Journal Article | ScienceDirect |
|   | 1 |   | 2015 | Balakumar P,Kav Cardiovascular drugs-induced oral toxicities: A murky area to be revisited and illuminated                                                     | Journal Article | ScienceDirect |
|   | 1 |   | 2009 | Burris K,Patel G, Chapter 10 - Diseases of the mouth and oral mucosa                                                                                           | Book Chapter    | ScienceDirect |
|   | 1 |   | 2006 | Maniar J,Kamath Chapter 11 - HIV and HIV-associated disorders                                                                                                  | Book Chapter    | ScienceDirect |
|   | 1 |   | 2007 | Crum PM,DesRoe CHAPTER 11 - Oral Cancer: Prevention, Management, and Treatment                                                                                 | Book Chapter    | ScienceDirect |
|   | 1 |   | 2004 | Sapp JP,Eversole CHAPTER 12 - Diseases of Blood                                                                                                                | Book Chapter    | ScienceDirect |
|   | 1 |   | 2009 | Skvarka CB,Ko CJ Chapter 13 - Lichenoid dermatoses                                                                                                             | Book Chapter    | ScienceDirect |
|   | 1 |   | 2016 | John V,Weddell Chapter 14 - Gingivitis and Periodontal Disease                                                                                                 | Book Chapter    | ScienceDirect |
|   | 1 |   | 2009 | Weidner N,Matt CHAPTER 14 - Oral Cavity and Jaws                                                                                                               | Book Chapter    | ScienceDirect |
|   | 1 |   | 2008 | Elad S,Epstein JJ Chapter 14 - Orofacial pain in the medically complex patient                                                                                 | Book Chapter    | ScienceDirect |
|   | 1 |   | 2007 | Wetmore RE CHAPTER 15 - Approach to the Pediatric Neck Mass                                                                                                    | Book Chapter    | ScienceDirect |
|   | 1 |   | 2020 | Pansare B,Nagas Chapter 15 - Dermatological Toxicities of Targeted Therapy                                                                                     | Book Chapter    | ScienceDirect |
|   | 1 |   | 2012 | Maurer T,Michel Chapter 17 - Global HIV and dermatology                                                                                                        | Book Chapter    | ScienceDirect |
|   | 1 |   | 2009 | Benollel F,Pertes Chapter 17 - OROFACIAL PAIN                                                                                                                  | Book Chapter    | ScienceDirect |
|   | 1 |   | 2013 | Little JW,Falace H Chapter 18 - AIDS, HIV Infection, and Related Conditions                                                                                    | Book Chapter    | ScienceDirect |
|   | 1 |   | 2012 | O'Handley JG,Te Chapter 19 - Otorhinolaryngology                                                                                                               | Book Chapter    | ScienceDirect |
|   | 1 |   | 2011 | McDonald RE,Av CHAPTER 20 - Gingivitis and Periodontal Disease                                                                                                 | Book Chapter    | ScienceDirect |
|   | 1 |   | 2012 | Liu JK,Lichtenst Chapter 21 - Inflammatory Bowel Disease                                                                                                       | Book Chapter    | ScienceDirect |
|   | 1 |   | 2008 | Maurer T CHAPTER 22 - Global HIV and Dermatology                                                                                                               | Book Chapter    | ScienceDirect |
|   | 1 |   | 2021 | Jung L,Paul WM, Chapter 23 - Autoimmune disorders                                                                                                              | Book Chapter    | ScienceDirect |
|   | 1 |   | 2009 | Petrus RE,Frank Chapter 23 - Large Intestine (Colon)                                                                                                           | Book Chapter    | ScienceDirect |
|   | 1 |   | 2011 | Sanders BJ,Shap CHAPTER 24 - Management of the Medically Compromised Patient: Hematologic Disorders, Cancer, Hepatitis, and AIDS                               | Book Chapter    | ScienceDirect |
|   | 1 |   | 2009 | Herron MD,Zone Chapter 25 - Cutaneous Diseases Associated with Gastrointestinal Abnormalities                                                                  | Book Chapter    | ScienceDirect |
|   | 1 |   | 2004 | Sanchez M,Fried Chapter 25 - Skin Manifestations of HIV Infection                                                                                              | Book Chapter    | ScienceDirect |
|   | 1 |   | 2016 | Sanders BJ,Shap Chapter 26 - Management of the Medically Compromised Patient: Hematologic Disorders, Cancer, Hepatitis, and AIDS                               | Book Chapter    | ScienceDirect |
|   | 1 |   | 2021 | Concha JS,Werth Chapter 28 - Skin                                                                                                                              | Book Chapter    | ScienceDirect |
|   | 1 |   | 2007 | Scully C,Diz Dios Chapter 3 - SPECIFIC PROBLEM AREAS                                                                                                           | Book Chapter    | ScienceDirect |
|   | 1 |   | 2012 | Chapter 3 - White Lesions                                                                                                                                      | Book Chapter    | ScienceDirect |
|   | 1 |   | 2014 | Lally A,Jenkins SJ Chapter 34 - Non-Malignant and Malignant Skin Lesions in Kidney Transplant Patients                                                         | Book Chapter    | ScienceDirect |
|   | 1 |   | 2012 | Chapter 36 - Chronic Disease Management                                                                                                                        | Book Chapter    | ScienceDirect |
|   | 1 |   | 2009 | Bouquot JE,Mull Chapter 4 - Lesions of the Oral Cavity                                                                                                         | Book Chapter    | ScienceDirect |
|   | 1 |   | 2017 | Franz-Montan M Chapter 4 - Nanostructured systems for transbuccal drug delivery                                                                                | Book Chapter    | ScienceDirect |
|   | 1 |   | 2011 | Werth VP,Verka K Chapter 41 - Skin                                                                                                                             | Book Chapter    | ScienceDirect |
|   | 1 |   | 2009 | Chacko MR,Staal CHAPTER 48 - GENITAL INFECTIONS                                                                                                                | Book Chapter    | ScienceDirect |
|   | 1 |   | 2012 | Elden LM,Wetm Chapter 55 - Otolaryngologic Disorders                                                                                                           | Book Chapter    | ScienceDirect |
|   | 1 |   | 2004 | Nopper AJ,Geor Chapter 56 - Rashes and Skin Lesions                                                                                                            | Book Chapter    | ScienceDirect |
|   | 1 |   | 2010 | Johnson MM Chapter 6 - Ear, Nose, and Throat Infections                                                                                                        | Book Chapter    | ScienceDirect |
|   | 1 |   | 2014 | Chapter 7 - Head and Neck Pathology                                                                                                                            | Book Chapter    | ScienceDirect |
|   | 1 |   | 2004 | Sapp JP,Eversole CHAPTER 7 - Oral Infections                                                                                                                   | Book Chapter    | ScienceDirect |
|   | 1 |   | 2020 | Sandri G,Ruggieri Chapter 8 - (Trans)buccal drug delivery                                                                                                      | Book Chapter    | ScienceDirect |
|   | 1 |   | 2006 | Chapter Four - Pathology                                                                                                                                       | Book Chapter    | ScienceDirect |
|   | 1 |   | 2020 | Xerez MC,Costa CLINICAL AND SURGICAL CONDUCT IN AMELOBLASTOMA OF LARGE DIMENSIONS                                                                              | Journal Article | ScienceDirect |
|   | 1 |   | 2018 | Davis MD,Lihr SJ Clinical pearls in dermatology 2018                                                                                                           | Journal Article | ScienceDirect |
|   | 1 |   | 2004 | Sharon-Buller A CO2-laser treatment of ulcerative lesions                                                                                                      | Journal Article | ScienceDirect |
| 1 |   |   | 1990 | Halvorsen JG Common Problems of the Oral Cavity                                                                                                                | Journal Article | ScienceDirect |
|   | 1 |   | 2009 | Communications orales                                                                                                                                          | Journal Article | ScienceDirect |
| 1 |   |   | 2020 | John SS,Mohant Comparative evaluation of Low Level Laser Therapy and cryotherapy in pain control and wound healing following oral surgery                      | Journal Article | ScienceDirect |
| 1 |   |   | 2006 | Beltrani VS,Bern Contact dermatitis: a practice parameter                                                                                                      | Journal Article | ScienceDirect |
|   |   | 1 | 2010 | Contents                                                                                                                                                       | Journal Article | ScienceDirect |
|   |   | 1 | 2014 | Contents: Volume 42                                                                                                                                            | Journal Article | ScienceDirect |
|   |   | 1 | 2005 | Cumulative Index                                                                                                                                               | Journal Article | ScienceDirect |
|   |   | 1 | 1990 | Cumulative Index 1990                                                                                                                                          | Journal Article | ScienceDirect |
|   |   | 1 | 1991 | Cumulative Index 1991                                                                                                                                          | Journal Article | ScienceDirect |
|   |   | 1 | 1992 | CUMULATIVE INDEX 1992                                                                                                                                          | Journal Article | ScienceDirect |
|   |   | 1 | 2000 | CUMULATIVE INDEX 2000                                                                                                                                          | Journal Article | ScienceDirect |
|   |   | 1 | 2004 | Cumulative Index 2004                                                                                                                                          | Journal Article | ScienceDirect |
|   |   | 1 | 2005 | Everekloglu C Current Concepts in the Etiology and Treatment of Behcet Disease                                                                                 | Journal Article | ScienceDirect |
|   |   | 1 | 2020 | Moghadam ET,Y Current herbal medicine as an alternative treatment in dentistry: In vitro, in vivo and clinical studies                                         | Journal Article | ScienceDirect |
|   |   | 1 | 1987 | Current papers in Oral Biology (34622-34725)                                                                                                                   | Journal Article | ScienceDirect |
|   |   | 1 | 1994 | Prussick R,Knowl Cutaneous drug reactions                                                                                                                      | Journal Article | ScienceDirect |
|   |   | 1 | 2013 | Thrasch B,Patel M Cutaneous manifestations of gastrointestinal disease: Part II                                                                                | Journal Article | ScienceDirect |
| 1 |   |   | 2021 | Marmora BC,Br Defocused high-power diode laser accelerates skin repair in a murine model through REDOX state modulation and regulation                         | Journal Article | ScienceDirect |
| 1 |   |   | 1993 | Coskey RJ Dermatologic therapy: 1992                                                                                                                           | Journal Article | ScienceDirect |
| 1 |   |   | 1985 | Coskey RJ Dermatologic therapy: December 1983 through November 1984                                                                                            | Journal Article | ScienceDirect |

|   |   |      |                     |                                                                                                                        |                 |               |
|---|---|------|---------------------|------------------------------------------------------------------------------------------------------------------------|-----------------|---------------|
| 1 |   | 1982 | Coskey RJ           | Dermatologic therapy: December, 1980, through November, 1981                                                           | Journal Article | ScienceDirect |
| 1 |   | 1998 | Barr CE, Glick M    | Diagnosis and Management of Oral and Cutaneous Lesions in HIV-1 Disease                                                | Journal Article | ScienceDirect |
| 1 |   | 1998 | Reich RF, Kerpel S  | Differential Diagnosis and Treatment of Ulcerative, Erosive, and Vesiculobullous Lesions of the Oral Mucosa            | Journal Article | ScienceDirect |
| 1 |   | 2017 | Greenberg SA, Sa    | Diseases of the lips                                                                                                   | Journal Article | ScienceDirect |
|   | 1 | 1996 | Camisa C, Rindler   | Diseases of the oral mucous membranes                                                                                  | Journal Article | ScienceDirect |
| 1 |   | 2020 | Iglesias-Sancho     | Drug Compounding for Diseases of the Oral Mucosa                                                                       | Journal Article | ScienceDirect |
| 1 |   | 2001 | Shin HT, Chang M    | Drug eruptions in children                                                                                             | Journal Article | ScienceDirect |
| 1 |   | 2002 | Shin HT, Change     | Drug eruptions in children                                                                                             | Journal Article | ScienceDirect |
|   | 1 | 2011 |                     | ECCO Congress Abstracts                                                                                                | Journal Article | ScienceDirect |
|   |   | 2018 | Rocca JP, Zhao M    | Effect of laser irradiation on aphthae pain management: A four different wavelengths comparison                        | Journal Article | ScienceDirect |
|   | 1 | 2019 | Bhattacharya PT     | Effectiveness of 904nm Gallium-Arsenide Diode Laser in Treatment of Oral Lichen Planus: Report of 2 Cases              | Journal Article | ScienceDirect |
| 1 |   | 2013 | Jiang XW, Zhang     | Effects of berberine gelatin on recurrent aphthous stomatitis: a randomized, placebo-controlled, double-blind trial in | Journal Article | ScienceDirect |
|   | 1 | 2017 | Al-Maweri SA, Ja    | Efficacy of low level laser therapy in the treatment of burning mouth syndrome: A systematic review                    | Journal Article | ScienceDirect |
| 1 |   | 2014 | Levy-Clarke G, Ja   | Expert Panel Recommendations for the Use of Anti-Tumor Necrosis Factor Biologic Agents in Patients with Ocular In      | Journal Article | ScienceDirect |
|   | 1 | 2020 | Netto JD, Mirand    | EXUBERANT SYMMETRIC UPOMATOSIS OF THE TONGUE                                                                           | Journal Article | ScienceDirect |
|   | 1 | 2017 | Chusid MJ           | Fever of Unknown Origin in Childhood                                                                                   | Journal Article | ScienceDirect |
|   | 1 | 2018 | World Dental Fe     | Friday, 7 September 2018 - Free Communication Sessions 28-42 and Poster Sessions 31-45                                 | Journal Article | ScienceDirect |
|   | 1 | 2015 | World Dental Fe     | Friday, September 12, 2014 - FREE COMMUNICATIONS SESSIONS 05-08                                                        | Journal Article | ScienceDirect |
| 1 |   | 2018 | Matthews N, Wo      | Genital diseases in the mature woman                                                                                   | Journal Article | ScienceDirect |
|   | 1 | 2005 | Lyon KF             | Gingivostomatitis                                                                                                      | Journal Article | ScienceDirect |
| 1 |   | 1997 | Task Force: Rico    | Guidelines of care for dermatologic conditions in patients infected with HIV                                           | Journal Article | ScienceDirect |
| 1 |   | 1997 | Chairman MJ, M      | Guidelines of care for dermatologic conditions in patients infected with HIV                                           | Journal Article | ScienceDirect |
|   | 1 | 2019 | Kao JH              | Highlights                                                                                                             | Journal Article | ScienceDirect |
|   | 1 | 2008 | Smith JA            | HIV and AIDS in the Adolescent and Adult: An Update for the Oral and Maxillofacial Surgeon                             | Journal Article | ScienceDirect |
|   | 1 | 2003 | Patton LL           | HIV Disease                                                                                                            | Journal Article | ScienceDirect |
| 1 |   | 1994 | Porter SR, Scully   | HIV. The surgeon's perspective Part 2. Diagnosis and management of non-malignant oral manifestations                   | Journal Article | ScienceDirect |
|   | 1 | 2022 | Besepago JF, de N   | How can biophotonics help dentistry to avoid or minimize cross infection by SARS-CoV-2?                                | Journal Article | ScienceDirect |
|   | 1 | 2007 | Fatahadeh M, S      | Human herpes simplex virus infections: Epidemiology, pathogenesis, symptomatology, diagnosis, and management           | Journal Article | ScienceDirect |
|   | 1 | 2001 | Ramsay A, Lightn    | Hypopyon Uveitis                                                                                                       | Journal Article | ScienceDirect |
| 1 |   | 2016 | Fellmann F, Ange    | IL-17 receptor A and adenosine deaminase 2 deficiency in siblings with recurrent infections and chronic inflammation   | Journal Article | ScienceDirect |
|   | 1 | 2020 |                     | Index                                                                                                                  | Book Chapter    | ScienceDirect |
|   | 1 | 2015 |                     | Index                                                                                                                  | Book Chapter    | ScienceDirect |
|   | 1 | 2017 |                     | Index                                                                                                                  | Book Chapter    | ScienceDirect |
|   | 1 | 2018 |                     | Index                                                                                                                  | Book Chapter    | ScienceDirect |
|   | 1 | 2015 |                     | Index                                                                                                                  | Book Chapter    | ScienceDirect |
|   | 1 | 2017 |                     | Index                                                                                                                  | Book Chapter    | ScienceDirect |
|   | 1 | 2019 |                     | Index                                                                                                                  | Book Chapter    | ScienceDirect |
|   | 1 | 2020 |                     | Index                                                                                                                  | Book Chapter    | ScienceDirect |
|   | 1 | 2016 |                     | Index                                                                                                                  | Book Chapter    | ScienceDirect |
|   | 1 | 2013 |                     | Index                                                                                                                  | Book Chapter    | ScienceDirect |
|   | 1 | 2018 |                     | Index                                                                                                                  | Book Chapter    | ScienceDirect |
|   | 1 | 2016 |                     | Index                                                                                                                  | Book Chapter    | ScienceDirect |
|   | 1 | 2014 |                     | Index                                                                                                                  | Book Chapter    | ScienceDirect |
|   | 1 | 2020 |                     | Index                                                                                                                  | Book Chapter    | ScienceDirect |
|   | 1 | 2015 |                     | Index                                                                                                                  | Book Chapter    | ScienceDirect |
|   | 1 | 2018 |                     | Index                                                                                                                  | Book Chapter    | ScienceDirect |
|   | 1 | 2021 |                     | Index                                                                                                                  | Book Chapter    | ScienceDirect |
|   | 1 | 1980 |                     | Index                                                                                                                  | Journal Article | ScienceDirect |
|   | 1 | 2014 |                     | Index of drugs                                                                                                         | Book Chapter    | ScienceDirect |
|   | 1 | 1990 |                     | Index to volume 11                                                                                                     | Journal Article | ScienceDirect |
|   | 1 | 1996 |                     | Index to volume 34 subject index                                                                                       | Journal Article | ScienceDirect |
|   | 1 | 2004 |                     | Index to volume 50                                                                                                     | Journal Article | ScienceDirect |
|   | 1 | 2004 |                     | Index to volume 50                                                                                                     | Journal Article | ScienceDirect |
|   | 1 | 1989 |                     | INDEX TO VOLUME 1, 1989                                                                                                | Journal Article | ScienceDirect |
| 1 |   | 1999 | Bordon E, Bordo     | INFECTIOUS DISEASE CONCERNS AND POSSIBLE COMPLICATIONS IN THE DENTAL PATIENT                                           | Journal Article | ScienceDirect |
| 1 |   | 1987 | Lawson W, Blitze    | Inflammatory and neoplastic lesions of the oral cavity                                                                 | Journal Article | ScienceDirect |
|   | 1 | 2016 | Gutiérrez-Vargas    | Instruments to measure the quality of life in patients with oral mucositis undergoing oncological treatment: a system  | Journal Article | ScienceDirect |
| 1 |   | 2016 | Gutiérrez-Vargas    | Instruments to measure the quality of life in patients with oral mucositis undergoing oncological treatment: a system  | Journal Article | ScienceDirect |
| 1 |   | 2014 | Uberti G, Goldbl    | Ischemic enterocolitis and its differential diagnosis                                                                  | Journal Article | ScienceDirect |
|   | 1 | 2003 | Egula A, Saldón R   | La Estomatitis Alftosa Recurrente (II): Aspectos diagnósticos y terapéuticos                                           | Journal Article | ScienceDirect |
|   | 1 | 2017 | Briguardello-Pet    | Laser use may improve pain and wound healing in patients with recurrent aphthous stomatitis                            | Journal Article | ScienceDirect |
|   | 1 | 2008 | Kotlow L            | Lasers and Soft Tissue Treatments for the Pediatric Dental Patient                                                     | Journal Article | ScienceDirect |
| 1 |   | 2000 | Convissar RA        | LASERS IN A HOSPITAL-BASED DENTAL PRACTICE                                                                             | Journal Article | ScienceDirect |
|   | 1 | 2004 | Convissar RA        | Lasers in general dentistry                                                                                            | Journal Article | ScienceDirect |
|   | 1 | 2017 |                     | Liste des abréviations                                                                                                 | Book Chapter    | ScienceDirect |
| 1 |   | 2010 | Robertson SA, La    | Long-Term pain in cats: How much do we know about this important welfare issue?                                        | Journal Article | ScienceDirect |
|   | 1 | 2019 | lâcome-Santos I     | Low-level laser as a complementary therapy in orofacial granulomatosis management: a case report                       | Journal Article | ScienceDirect |
|   | 1 | 2018 | Jijn MJ, Râkârâd    | Low level laser therapy versus 5% amlexanox: a comparison of treatment effects in a cohort of patients with minor      | Journal Article | ScienceDirect |
| 1 |   | 1992 | Scully C, McCarth   | Management of oral health in persons with HIV infection                                                                | Journal Article | ScienceDirect |
|   | 1 | 2016 | Naeab S, Khursh     | Management of recurrent aphthous ulcers using low-level lasers: A systematic review                                    | Journal Article | ScienceDirect |
| 1 |   | 2015 | Landry BW, Fisch    | Managing Chronic Pain in Children and Adolescents: A Clinical Review                                                   | Journal Article | ScienceDirect |
|   | 1 | 1991 | van Riel PL         | Metals                                                                                                                 | Book Chapter    | ScienceDirect |
| 1 |   | 2020 | Sganzerla JT, Kru   | MOUTH ULCERS IN CANCER PATIENTS UNDERGOING EXPERIMENTAL TREATMENT WITH IMMUNE CHECKPOINT INHIBITORS                    | Journal Article | ScienceDirect |
|   | 1 | 2016 | De Sanctis V, Bos   | Mucositis in head and neck cancer patients treated with radiotherapy and systemic therapies: Literature review and     | Journal Article | ScienceDirect |
| 1 |   | 1987 | Case JD, Callen JH  | Mucous membranes in systemic disease                                                                                   | Journal Article | ScienceDirect |
|   | 1 | 2016 | Wanat KA, Kim B     | Multisystem diseases affecting the skin and eye                                                                        | Journal Article | ScienceDirect |
| 1 |   | 2020 | Kia SJ, Mansouria   | New concentration of curcumin orabase in recurrent aphthous stomatitis: A randomized, controlled clinical trial        | Journal Article | ScienceDirect |
|   | 1 | 2014 | Sehgal VN, Pandit   | Nonspecific genital ulcers                                                                                             | Journal Article | ScienceDirect |
|   | 1 | 2020 | Silva WR, Franca    | ODONTOGENIC FIBROMIXOMA: A CASE REPORT OF AN UNCOMMON NEOPLASM                                                         | Journal Article | ScienceDirect |
|   | 1 | 2020 | Santana LA, Aguil   | ODONTOMA-ASSOCIATED CALCIFYING ODONTOGENIC CYST MIMETIZING DENTAL GERM                                                 | Journal Article | ScienceDirect |
|   | 1 | 2008 | Guhli G, Diaz-Ley   | Off-label Use of Biologic Agents in the Treatment of Dermatitis. Part 2: Etanercept, Efalizumab, Alefacept, Rituximat  | Journal Article | ScienceDirect |
|   | 1 | 2022 | Tuchin VV, Genin    | Optical clearing of tissues: Issues of antimicrobial phototherapy and drug delivery                                    | Journal Article | ScienceDirect |
|   | 1 | 1996 | Singh N, Scully C   | Oral complications of cancer therapies: Prevention and management                                                      | Journal Article | ScienceDirect |
|   | 1 | 2009 | Leao JC, Ribeiro C  | Oral Complications of HIV Disease                                                                                      | Journal Article | ScienceDirect |
|   | 1 | 2017 | Elad S, Zadik Y, Ya | Oral Complications of Nonsurgical Cancer Therapies                                                                     | Journal Article | ScienceDirect |
|   | 1 | 2000 | Tüzün B, Tüzün Y    | Oral disorders: unapproved treatments or indications11The opinions expressed herein are solely those of the invest     | Journal Article | ScienceDirect |
|   | 1 | 2008 | Schubert MM, Co     | Oral Graft-Versus-Host Disease                                                                                         | Journal Article | ScienceDirect |
| 1 |   | 2010 | Warnakulasuriya     | Oral health risks of tobacco use and effects of cessation                                                              | Journal Article | ScienceDirect |
|   | 1 | 2021 | Asan MF, Castelli   | Oral Immune-Related Adverse Events—Current Concepts and their Management                                               | Journal Article | ScienceDirect |
| 1 |   | 1999 | Patton LL, van de   | ORAL INFECTIONS AND OTHER MANIFESTATIONS OF HIV DISEASE                                                                | Journal Article | ScienceDirect |
|   | 1 | 2013 | Patton LL           | Oral Lesions Associated with Human Immunodeficiency Virus Disease                                                      | Journal Article | ScienceDirect |
|   | 1 | 2003 | Patel NJ, Scubba    | Oral lesions in young children                                                                                         | Journal Article | ScienceDirect |
|   | 1 | 1993 | Itin PH, Lautensch  | Oral manifestations in HIV-infected patients: Diagnosis and management                                                 | Journal Article | ScienceDirect |
| 1 |   | 2014 | Cowan GM, Lock      | Oral Manifestations of Allergic, Infectious, and Immune-mediated Disease                                               | Journal Article | ScienceDirect |
|   | 1 | 2017 | Mejia LM            | Oral Manifestations of Gastrointestinal Disorders                                                                      | Journal Article | ScienceDirect |
|   | 1 | 2000 | Casiglia JW, Woo    | Oral manifestations of HIV infection                                                                                   | Journal Article | ScienceDirect |
| 1 |   | 1991 | Scully C, Laskaris  | Oral manifestations of HIV infection and their management. I. More common lesions                                      | Journal Article | ScienceDirect |
|   | 1 | 2017 | Johnson L, Persch   | Oral Manifestations of Immunologically Mediated Diseases                                                               | Journal Article | ScienceDirect |
|   | 1 | 2014 | Stoopler ET, Solle  | Oral Mucosal Diseases: Evaluation and Management                                                                       | Journal Article | ScienceDirect |
|   | 1 | 2005 | Lalla RV, Peterso   | Oral mucositis                                                                                                         | Journal Article | ScienceDirect |
| 1 |   | 2022 | Shetty SS, Maruti   | Oral mucositis: Current knowledge and future directions                                                                | Journal Article | ScienceDirect |
|   | 1 | 2011 | Sanjar FA, Queiro   | Otolaryngologic manifestations in HIV disease - clinical aspects and treatment                                         | Journal Article | ScienceDirect |
| 1 |   | 1999 | Chandrasekhar       | Oxypentifylline in the management of recurrent aphthous oral ulcersAn open clinical trial                              | Journal Article | ScienceDirect |



|   |  |  |   |      |                   |                                                                                                                     |                 |        |
|---|--|--|---|------|-------------------|---------------------------------------------------------------------------------------------------------------------|-----------------|--------|
|   |  |  | 1 | 2017 | Yilmaz HG,Albab   | Treatment of recurrent aphthous stomatitis with Er,Cr:YSGG laser irradiation: A randomized controlled split mouth c | Journal Article | Scopus |
|   |  |  | 1 | 2022 | Ghali HG,Abdulh   | Treatment of recurrent minor aphthous stomatitis using diode laser (940 nm)                                         | Journal Article | Scopus |
| 1 |  |  |   | 2015 | Lal K,Parthiban J | Usefulness of laser in oral and maxillofacial surgery                                                               | Journal Article | Scopus |
| 1 |  |  |   | 2015 | Babu B,Uppada     | Versatility of diode lasers in low-level laser therapy for the management of recurrent aphthous stomatitis          | Journal Article | Scopus |

Literature Review
